1 **Nitric oxide acts as a cotransmitter in a subset of dopaminergic neurons to diversify**  
2 **memory dynamics**

3

4 Yoshinori Aso<sup>1\*</sup>, Robert Ray<sup>1</sup>, Xi Long<sup>1</sup>, Karol Cichewicz<sup>2</sup>, Teri-TB Ngo<sup>1</sup>, Brandi  
5 Sharp<sup>1</sup>, Christina Christoforou<sup>1</sup>, Andrew Lemire<sup>1</sup>, Jay Hirsh<sup>2</sup>, Ashok Litwin-Kumar<sup>3</sup>,  
6 Gerald M. Rubin<sup>1\*</sup>

7

8 <sup>1</sup> Janelia Research Campus, Howard Hughes Medical Institute, 19700 Helix Drive, Ashburn,  
9 VA 20147, USA

10 <sup>2</sup> Department of Biology, University of Virginia, Charlottesville, VA 22904, USA

11 <sup>3</sup> Department of Neuroscience, Columbia University, 3227 Broadway, New York, NY  
12 10027, USA

13 Contact Info

14 Correspondence: [asoy@janelia.hhmi.org](mailto:asoy@janelia.hhmi.org) and [rubing@janelia.hhmi.org](mailto:rubing@janelia.hhmi.org)

15

16 **Summary**

17 Animals employ multiple and distributed neuronal networks with diverse learning rules and  
18 synaptic plasticity dynamics to record distinct temporal and statistical information about  
19 the world. However, the molecular mechanisms underlying this diversity are poorly  
20 understood. The anatomically defined compartments of the insect mushroom body function  
21 as parallel units of associative learning, with different learning rates, memory decay  
22 dynamics and flexibility (Aso & Rubin 2016). Here we show that nitric oxide (NO) acts as  
23 a neurotransmitter in a subset of dopaminergic neurons in *Drosophila*. NO's effects  
24 develop more slowly than those of dopamine and depend on soluble guanylate cyclase in  
25 postsynaptic Kenyon cells. NO acts antagonistically to dopamine; it shortens memory  
26 retention and facilitates the rapid updating of memories. The interplay of NO and dopamine  
27 enables memories stored in local domains along Kenyon cell axons to be specialized for  
28 predicting the value of odors based only on recent events. Our results provide key  
29 mechanistic insights into how diverse memory dynamics are established in parallel memory  
30 systems.

31

32

33 **Keywords**

34 memory dynamics, associative learning, cotransmitter, dopamine, nitric oxide, mushroom  
35 body, *Drosophila*

36

37

## 38 **Introduction**

39 An animal's survival in a dynamically changing world depends on storing distinct  
40 sensory information about their environment as well as the temporal and probabilistic  
41 relationship between those cues and punishment or reward. Thus it is not surprising that  
42 multiple distributed neuronal circuits in the mammalian brain have been shown to process  
43 and store distinct facets of information acquired during learning (White & McDonald,  
44 2002). Even a simple form of associative learning such as fear conditioning induces  
45 enduring changes, referred to as memory engrams, in circuits distributed across different  
46 brain areas (Herry & Johansen, 2014). Do these multiple engrams serve different  
47 mnemonic functions, what molecular and circuit mechanisms underly these differences,  
48 and how are they integrated to control behavior? Localizing these distributed engrams,  
49 understanding what information is stored in each individual memory unit and how units  
50 interact to function as one network are important but highly challenging problems.

51 The *Drosophila* mushroom body (MB) provides a well-characterized and experimentally  
52 tractable system to study parallel memory circuits. Olfactory memory formation and  
53 retrieval in insects requires the MB (DeBelle & Heisenberg, 1994; Dubnau, Grady,  
54 Kitamoto, & Tully, 2001; Erber, MASUHR, & MENZEL, 1980; Heisenberg, 2003;  
55 McGuire, Le, & Davis, 2001). In associative olfactory learning, exposure to an odor  
56 paired with a reward or punishment results in formation of a positive- or negative-valence  
57 memory, respectively (Quinn, Harris, & Benzer, 1974; Tempel, Bonini, Dawson, &  
58 Quinn, 1983; Tully & Quinn, 1985). In the MB, sensory stimuli are represented by the  
59 sparse activity of ~2,000 Kenyon cells (KCs). Each of 20 types of dopaminergic neurons

60 (DANs) innervates compartmental regions along the parallel axonal fibers of the KCs.  
61 Similarly, 22 types of mushroom body output neurons (MBONs) arborize their dendrites  
62 in specific axonal segments of the KCs; together, the arbors of the DANs and MBONs  
63 define the compartmental units of the MB (Aso, Hattori, et al., 2014; Mao & Davis, 2009;  
64 Tanaka, Tanimoto, & Ito, 2008). Activation of individual MBONs can cause behavioral  
65 attraction or repulsion, depending on the compartment in which their dendrites arborize,  
66 and MBONs appear to use a population code to govern behavior (Oswald et al 2015; Aso  
67 et al 2014b).

68 A large body of evidence indicates that these anatomically defined compartments of the  
69 MB are also the units of associative learning (Aso et al., 2012; Aso, Sitaraman, et al.,  
70 2014; Aso et al., 2010; Berry, Phan, & Davis, 2018; A. L. Blum, W. Li, M. Cressy, & J.  
71 Dubnau, 2009; Bouzaiane, Trannoy, Scheunemann, Placais, & Preat, 2015; Burke et al.,  
72 2012; Claridge-Chang et al., 2009; Huetteroth et al., 2015; Ichinose et al., 2015; Isabel,  
73 Pascual, & Preat, 2004; Krashes et al., 2009; Lin et al., 2014; Liu et al., 2012; Oswald et  
74 al., 2015; Pai et al., 2013; Placais, Trannoy, Friedrich, Tanimoto, & Preat, 2013;  
75 Schwaerzel et al., 2003; Sejourne et al., 2011; Trannoy, Redt-Clouet, Dura, & Preat,  
76 2011; Yamagata et al., 2015; Zars, Fischer, Schulz, & Heisenberg, 2000). Despite the  
77 long history of behavioral genetics in fly learning and memory, many aspects of the  
78 signaling pathways governing plasticity—especially whether they differ between  
79 compartments—remain poorly understood. Nevertheless, dopaminergic neurons and  
80 signaling play a key role in all MB compartments, and flies can be trained to form  
81 associative memories by pairing the presentation of an odor with stimulation of a single  
82 dopaminergic neuron (Aso et al., 2010). Punishment or reward activates distinct sets of

83 DANs that innervate specific compartments of the MB (Das et al., 2014; Galili et al.,  
84 2014; Kirkhart & Scott, 2015; Liu et al., 2012; Mao & Davis, 2009; Riemensperger,  
85 Voller, Stock, Buchner, & Fiala, 2005; Tomchik, 2013). Activation of the DAN  
86 innervating a MB compartment induces enduring depression of KC-MBONs synapses in  
87 those specific KCs that were active in that compartment at the time of dopamine release  
88 (Berry et al., 2018; Bouzaiane et al., 2015; Cohn, Morantte, & Ruta, 2015; Hige, Aso,  
89 Modi, Rubin, & Turner, 2015; Oswald et al., 2015; Sejourne et al., 2011). Thus, which  
90 compartment receives dopamine during training appears to determine the valence of the  
91 memory, while which KCs were active during training determines the sensory specificity  
92 of the memory (Figure 1A).

93 Compartments operate with distinct learning rules. Selective activation of DANs  
94 innervating specific compartments has revealed that they can differ extensively in their  
95 rates of memory formation, decay dynamics, storage capacity, and flexibility to learn new  
96 associations (Aso et al., 2012; Aso & Rubin, 2016; Huetteroth et al., 2015; Yamagata et  
97 al., 2015). For instance, the dopaminergic neuron PAM- $\alpha$ 1 can induce a 24h memory  
98 with a single 1-minute training session, whereas PPL1- $\alpha$ 3 requires ten repetitions of the  
99 same training to induce a 24h memory. PPL1- $\gamma$ 1pedc (aka MB-MP1) can induce a robust  
100 short-lasting memory with a single 10-second training, but cannot induce long-term  
101 memories even after 10 repetitions of a 1-minute training. PAM- $\alpha$ 1 can write a new  
102 memory without compromising an existing memory, whereas PPL1- $\gamma$ 1pedc extinguishes  
103 the existing memory when writing a new memory (Aso & Rubin, 2016). What molecular  
104 and cellular differences are responsible for the functional diversity of these  
105 compartments? Some differences might be arise from differences among KC cell types

106 (reviewed in Keene and Waddel, 2007, McGuire et al., 2005), but memory dynamics are  
107 different even between compartments that lie along the axon bundles of the same Kenyon  
108 cells (for example,  $\alpha 1$  and  $\alpha 3$ ). In this paper, we show that differences in memory  
109 dynamics between compartments can arise from the deployment of distinct cotransmitters  
110 by the DAN cell types that innervate them.

111

112

113

114 **Results**

115 **Dopaminergic neurons can induce memories without dopamine, but with inverted**  
116 **valence**

117 DANs release diverse cotransmitters in the mammalian brain (Maher & Westbrook,  
118 2008; Stuber, Hnasko, Britt, Edwards, & Bonci, 2010; Sulzer et al., 1998; Tecuapetla et  
119 al., 2010; Tritsch, Ding, & Sabatini, 2012). In *Drosophila*, the terminals of the MB DANs  
120 contain both clear and dense-core vesicles (Takemura et al., 2017), prompting us to ask if  
121 the DAN cell types innervating different MB compartments might use distinct  
122 cotransmitters that could play a role in generating compartment-specific learning rules.  
123 We individually activated several DAN cell types in a tyrosine hydroxylase (TH) mutant  
124 background that eliminates dopamine synthesis in the nervous system (Cichewicz et al.,  
125 2016; Riemensperger et al., 2011) and assayed their ability to induce associative learning  
126 when paired with an odor stimulus.

127 We first examined the PPL1 cluster of DANs, which innervate several MB compartments  
128 involved in aversive learning, driven by stimuli such as electric shock, noxious  
129 temperature, and bitter taste (Galili et al., 2014; Kirkhart & Scott, 2015; Mao & Davis,  
130 2009; Riemensperger et al., 2005; Tomchik, 2013). Using an optogenetic olfactory arena  
131 (Aso & Rubin, 2016), we trained flies by pairing odor exposure with optogenetic  
132 activation of these DANs using CsChrimson-mVenus and then immediately tested  
133 memory formation (Figure 1B, C). In flies with a wild-type TH allele, this training  
134 protocol induced robust negative-valence memory of the paired odor (Figure 1D), as  
135 observed previously (Claridge-Chang et al., 2009; Schroll et al., 2006). In the dopamine-

136 deficient background, activation of the same DANs still induced a robust odor memory,  
137 but its valence was now positive (Figure 1E). This result is consistent with previous  
138 findings that TH mutant flies show a weak positive-valence memory after odor-shock  
139 conditioning (Riemensperger et al., 2011), although the positive-valence memory we  
140 observed is much stronger.

141 Arguing against the possibility that this valence-inversion phenotype resulted from a  
142 developmental defect caused by the constitutive absence of dopamine (Niens et al.,  
143 2017), feeding L-DOPA and carbidopa to adult-stage flies fully restored normal valence  
144 memory (Figure 1F). Nor did the valence-inversion phenotype result from lack of  
145 dopamine signaling outside the MB, as restoring TH expression specifically in the PPL1  
146 DANs was sufficient to restore formation of negative-valence memory (Figure 1G;  
147 Figure 1-figure supplement 1). Moreover, valence-inversion in the absence of dopamine  
148 was not limited to punishment-representing DANs. Activation of reward-representing  
149 PAM cluster DANs (Burke et al., 2012; Liu et al., 2012) in the TH mutant background  
150 also induced odor memory of opposite valence, in this case negative rather than positive  
151 (Figure 1D,E); as we found for PPL1-induced memories, either L-DOPA and carbidopa  
152 feeding or TH expression in reward-representing DANs restored the ability to form a  
153 memory of the valence that is observed in wild-type flies (Figure 1F,G). These  
154 observations suggested the possible presence of a cotransmitter in these DANs that exerts  
155 an opposite effect from dopamine on synaptic plasticity and memory.

### 156 **Putative cotransmitter effects differ among DAN cell types**

157 If DAN cell types use different cotransmitters, we might expect the effects of activating



158 DANs in the TH mutant background to vary with cell type. We tested this idea by  
159 comparing the associative memories formed in wild-type and TH mutant backgrounds  
160 when an odor was paired with optogenetic activation of different subsets of DAN cell  
161 types using seven split-GAL4 driver lines (Figure 2 and Figure 2-figure supplement 1).  
162 We also demonstrated that valence inversion is not limited to training using direct DAN  
163 stimulation with CsChrimson; activating bitter taste sensory neurons using Gr66a-GAL4,  
164 which activate PPL1-DANs (Das et al., 2014; Kirkhart & Scott, 2015), likewise induced  
165 memories of inverted valence (Figure 2). We identified two DAN cell types that  
166 exhibited the valence-inversion phenotype: PPL1- $\gamma$ 1pedc and PAM- $\gamma$ 5/PAM- $\beta$ '2a. With  
167 PPL1- $\gamma$ 1pedc stimulation, memory valence switched from negative to positive in TH  
168 mutant animals. Conversely, with PAM- $\gamma$ 5 and PAM- $\beta$ '2a stimulation, memory valence  
169 flipped in the opposite direction, from positive to negative in TH mutants.

170 The valence-inversion phenotype was not, however, observed in all compartments.  
171 Activation of PPL1- $\gamma$ 2 $\alpha$ '1 resulted in negative-valence memory in both TH mutant and  
172 wild type, suggesting a cotransmitter with the same sign of action as dopamine.  
173 Activation of PPL1- $\alpha$ 3 or PAM- $\beta$ '1 in the TH mutant background did not induce  
174 significant memory, indicating that these cells do not express a cotransmitter capable of  
175 inducing memory without dopamine.

### 176 **Identification of nitric oxide synthase in a subset of DAN cell types by transcript** 177 **profiling**

178 To identify potential cotransmitters, we profiled (using RNA-Seq methods) the  
179 transcriptomes of the DAN cell types in these seven split-GAL4 lines, and looked for

180 candidates whose expression correlated with the valence-inversion effect. Isolation of  
181 pure populations of specific DAN cell types is challenging because of their low  
182 abundance. For example, PPL1 is a single cell in each brain hemisphere and thus requires  
183 ~50,000-fold enrichment. We used a collection of split-GAL4 driver lines (Aso, Hattori,  
184 et al., 2014) to fluorescently mark the soma of specific DAN cell types and confirmed  
185 that the nuclear-targeted reporters we used for sorting visualized the same restricted set of  
186 cells as the membrane-targeted reporters in the original study. In this way, we selected a  
187 combination of reporter and driver lines that provided the most specific labeling of the  
188 targeted cell type. The number of detected genes and the correlation across biological  
189 replicates of RNA profiling experiments has been observed to be highly dependent on  
190 cDNA yield during library construction (Fred P. Davis1, 2018). Due to different soma  
191 sizes, the amount of mRNA per cell is expected to differ across cell types. To estimate  
192 the number of cells necessary for our experimental condition, we started with MBON-  
193  $\gamma$ 1pedc> $\alpha/\beta$  cells, a cell type that occurs once per hemisphere. Three replicates with ~350  
194 cells yielded on average 5.3  $\mu$ g of cDNA, and we observed a high correlation across  
195 biological replicates on these dataset (Pearson R=0.90). Thus we aimed for similar cDNA  
196 yields by sorting more cells for cell types with a smaller soma (i.e., KCs and PAM cluster  
197 DANs). We collected data from ten driver lines for DAN cell types, with 2-4 biological  
198 replicates per line. We also examined two classes of KCs and three additional MBON  
199 cell types. On average, we collected 2,500 cells for KCs, 546 +/- 60 cells for PAM  
200 DANs, and 310 +/- 18 cells for PPL1 DAN and MBON cell types per replicate, by hand  
201 or fluorescence activated cell sorting (FACS), yielding 3.53 +/- 0.21  $\mu$ g of cDNA, 22.3  
202 +/- 0.8 million mapped reads per replicate, and 0.80 +/- 0.02 Pearson R across biological

203 replicates (Figure 3-figure supplement 1; Supplementary File 1).

204 We analyzed these data for different splicing isoforms (see Material and methods). Using  
205 DE-seq2 (Love, Huber, & Anders, 2014), we searched for transcripts that were  
206 differentially expressed among DAN cell types and, in particular, for those commonly  
207 expressed in DAN cell types that showed the valence-inversion phenotype (PPL1- $\gamma$ 1pedc  
208 and PAM- $\gamma$ 5), but not in other cell types (Figure 3A,B). Through this analysis, we  
209 identified nitric oxide synthase (NOS) as a strong candidate for a cotransmitter. Similar  
210 enrichment in PPL1- $\gamma$ 1pedc and PAM- $\gamma$ 5 was found in only five other transcripts, none  
211 of which are likely to encode a neurotransmitter: (i) *epac-RG*, a cAMP-activated guanine  
212 nucleotide exchange factor. (ii) *br-RO*, *br-RI*, both transcripts of the zinc finger  
213 transcription factor *broad*, (iii) *CG32547-RD*, a G-protein coupled receptor, and (iv)  
214 *CG12717-RA*, a SUMO-specific isopeptidase (data reviewed in FlyBase)(Thurmond et  
215 al., 2019). In addition to these transcripts that matched our criteria, we found other  
216 potential candidates whose expression was not a precise match. We detected a high level  
217 of the *DH44* neuropeptide in PPL1- $\gamma$ 1pedc, but not in PAM- $\gamma$ 5. A receptor for DH44,  
218 *DH44-RI*, was expressed in PAM- $\gamma$ 4 and/or  $\gamma$ 4< $\gamma$ 1 $\gamma$ 2 and to lower extent in  $\alpha/\beta$  Kenyon  
219 cells, but neither of the two known receptors for DH44 was detected in  $\gamma$  Kenyon cells  
220 (Figure 3-figure supplement 2). Transcripts of the neuropeptide gene *Nplp1* were detected  
221 in PPL1- $\gamma$ 1pedc and PAM- $\gamma$ 5, but other DANs and MBONs also expressed this gene  
222 (Figure 3-figure supplement 2)(Croset, Treiber, & Waddell, 2018). Expression of  
223 *Gyc76C*, the receptor for *Nplp1*, was barely detectable in KCs, DANs, and MBONs.  
224 Complete transcript data are presented in Supplementary File 1, and the expression of  
225 genes encoding neurotransmitters, neuropeptides and their receptors, as well as

226 components of gap junctions, is summarized in Figure 3-figure supplement 2. Although  
227 we cannot formally rule out a contribution of other genes and pathways, we chose to  
228 pursue NOS, as it was the most promising candidate for a cotransmitter that might be  
229 responsible for the valence-inversion effect.

230 *Drosophila* has only one gene encoding nitric oxide synthase (*Nos*), but this gene has  
231 multiple splicing isoforms (Figure 3C)(Rabinovich, Yaniv, Alyagor, & Schuldiner, 2016;  
232 Regulski & Tully, 1995; Stasiv, Regulski, Kuzin, Tully, & Enikolopov, 2001). Only  
233 NOS1, the full-length isoform, is functional, while the truncated isoforms can function as  
234 a dominant-negative. Thus identifying the expressed splicing isoform of *Nos* was crucial  
235 for understanding NOS functions in DANs. NOS1 was the most abundantly expressed  
236 isoform as judged by RNA profiling. We confirmed NOS1 expression by combining  
237 fluorescent *in situ* hybridization (FISH) and antibody staining. For whole-brain FISH  
238 (Long, Colonell, Wong, Singer, & Lionnet, 2017), we used 40 probes against c-terminus  
239 exons that are present in NOS1 and NOS4, but not NOS-RK, transcripts (Figures 3C and  
240 Figure 3-figure supplement 1 D). PPL1- $\gamma$ 1pedc was labeled with these FISH probes  
241 (Figure S3D), confirming expression of NOS1 or NOS4 in these cells. For  
242 immunohistochemistry, we used an antibody raised against exon 16 of NOS (Kuntz,  
243 Poeck, & Strauss, 2017; Yakubovich, Silva, & O'Farrell, 2010) that is present in NOS1  
244 and NOS-RK, but not in NOS4 (Figure 3C). We validated its specificity by  
245 demonstrating a loss of the staining that accompanied RNAi-mediated knockdown of  
246 NOS in PPL1- $\gamma$ 1pedc (Figures 3D and Figure 3-figure supplement 1 B)(Ni et al., 2011).  
247 In the MB lobes, the  $\gamma$ 1pedc and  $\gamma$ 5 compartments showed enriched anti-NOS  
248 immunoreactivity, as expected from RNA-Seq data. In addition,  $\gamma$ 3 and  $\gamma$ 4 also showed

249 significant anti-NOS immunoreactivity (Figures 3E). However, the low NOS transcript  
250 levels observed via RNA-Seq in PAM- $\gamma$ 3 and PAM- $\gamma$ 4 are most consistent with anti-NOS  
251 immunoreactivity in  $\gamma$ 3 and  $\gamma$ 4 arising from non-DAN cell types or developmental  
252 expression. The cell-type-specific expression and localization of NOS1 in a subset of  
253 DANs associated with compartments that display the valence-inversion phenotype  
254 prompted us to test the hypothesis that NO plays a direct role in generating the diversity  
255 of memory dynamics observed in different compartments.

### 256 **NOS in dopaminergic neurons contributes to memory formation**

257 We next evaluated the role of NOS in memory formation in the absence of dopamine  
258 biosynthesis. If NO is indeed the cotransmitter that supports the valence-inverted memory  
259 in TH mutant flies, we would predict that inhibiting NOS should block this effect, and  
260 that flies would show no memory. To assess the requirement for NO synthesis, we fed  
261 flies the competitive NOS inhibitor L-NNA for one day before training and then  
262 measured the memory induced by optogenetic training using PPL1- $\gamma$ 1pedc in a TH  
263 mutant background. We found that this treatment reduced valence-inverted memory  
264 formation in a dose-dependent manner (Figure 4A). While NOS is broadly expressed in  
265 the brain (Kuntz et al., 2017), two lines of evidence suggest that L-NNA fed flies are  
266 capable of olfactory learning. First, when we bypassed the TH mutant by feeding L-  
267 DOPA and carbidopa to restore dopamine levels, the L-NNA fed flies showed a normal  
268 level of negative-valence odor memory formation in response to pairing an odor with  
269 PPL1-  $\gamma$ 1pedc activation (Figure 4A). Second, the effect of L-NNA feeding was cell-type  
270 specific; memory formed by activation of either PPL1- $\gamma$ 1pedc or PAM- $\gamma$ 5/ $\beta$ '2a was

271 affected but that formed by activation of PPL1- $\gamma$ 2 $\alpha$ '1, was not (Figure 4B). We obtained  
272 consistent results in knockdown experiments where we expressed NOS-RNAi in all PPL1  
273 DANs (Figure 4C).

274 We also examined whether we could transfer this valence-inversion property to another  
275 compartment by ectopically expressing NOS. We expressed NOS in PPL1- $\alpha$ 3, a  
276 compartment where we observed no intrinsic NOS expression, and where extended  
277 optogenetic training induces a negative-valence memory (Aso & Rubin, 2016). TH  
278 mutant flies formed no odor association with PPL1- $\alpha$ 3 activation, but when NOS was  
279 ectopically expressed in the  $\alpha$ 3 compartment, the same training protocol induced a  
280 positive-valence memory (Figure 4D and E). In other words, NO was able to form an  
281 association of opposite valence to that formed by dopamine. These results demonstrate  
282 the functional significance of NOS in DANs, but leave open its mechanism of action.

### 283 **Soluble guanylate cyclase in Kenyon cells is required to form NO-dependent** 284 **memories**

285 In the MB, dopamine induces synaptic plasticity by binding to dopamine receptors on the  
286 axons of KCs and activating the *rutabaga*-encoded adenylyl cyclase in these cells  
287 (Gervasi, Tchenio, & Preat, 2010; Tomchik & Davis, 2009). Does NO released from  
288 DANs also act on receptors in the KCs? RNA-seq data revealed expression of the  
289 subunits of soluble guanylate cyclase (sGC), *Gyc $\alpha$ 99B* and *Gyc $\beta$ 100B*, in KCs, DANs,  
290 and MBONs (Figure 5A-B). Similar to its mammalian homologs, *Drosophila* sGC is  
291 activated upon binding NO (Morton, Langlais, Stewart, & Vermehren, 2005). Transcripts  
292 for other guanylyl cyclases were found at lower levels, if at all (Figure 5A-B;

293 Supplementary File 1), suggesting that sGC formed by  $Gyc\alpha99B$  and  $Gyc\beta100B$  is the  
294 primary source of cGMP in KCs. Consistent with these transcriptomic data, we observed  
295 that a protein trap  $Gyc\beta100B$ -EGFP fusion protein (MI08892; (Venken et al., 2011) was  
296 broadly expressed in the MB lobes (Figure 5-figure supplement 1).

297 We tested the role of  $Gyc\beta100B$  with acute RNAi knockdown in KCs using the MB-  
298 switch system (McGuire, Le, Osborn, Matsumoto, & Davis, 2003). This adult-specific  
299 knockdown abolished the valence-inverted memory induced by activation of PPL1-  
300  $\gamma1pedc$  in a TH mutant background (Figure 5C). This effect is unlikely to be caused by a  
301 developmental defect in KCs, as we could restore normal memory by feeding flies L-  
302 DOPA (Figure 5C). Taken together, our data argue strongly that NO functions as  
303 cotransmitter that is released by DANs and acts on sGC in postsynaptic KCs to regulate  
304 cGMP levels, although our results do not exclude the possibility that NO has other  
305 targets.

### 306 **NO-dependent and dopamine-dependent memories have different kinetics**

307 We next compared the dynamics of memory induction by NO and dopamine and explored  
308 the consequences of their combined action. First, we examined memory acquisition rates  
309 when flies were trained by activation of PPL1- $\gamma1pedc$  (Figure 6A). In wild-type flies,  
310 PPL1- $\gamma1pedc$  activation as brief as 10s can induce significant negative-valence memory.  
311 Blocking NOS activity with L-NNA did not affect the memory scores observed shortly  
312 after a wide range of training protocols (Figure 6B). In contrast, longer and repetitive  
313 training was required to induce robust NO-dependent positive-valence memory in the  
314 absence of dopamine (Figure 6A-B).

315 Riemensperger et al. (2011) reported that dopamine-deficient flies developed weak  
316 positive-valence memory after odor-shock conditioning, but this memory was not  
317 detectable until two hours after the training. Motivated by this observation, we examined  
318 the kinetics of NO-dependent memory formation and the role of NOS in memory  
319 retention. When we used a single cycle of training, we found that NO-dependent memory  
320 develops slowly over time. Memory scores were not significantly different from zero at  
321 1, 3, 5 min after training, and only became significant after 10 min. Once formed,  
322 however, these NO-dependent memories were long lasting and were still more than half  
323 maximal after 6 hours (Figure 6C). This result contrasts with the time course of memory  
324 formation by PPL1- $\gamma$ 1pedc activation in a wild-type background, where memory is  
325 detectable within 1 min after training, but has a half-life of only 2-3 hours (Aso et al.,  
326 2012). These observations raised the possibility that NO signaling, with its opposite  
327 valence and slower dynamics, might serve to limit memory retention in a wild-type  
328 background. Indeed, we found that expression of NOS-RNAi or L-NNA feeding  
329 prolonged the retention of memories induced by either optogenetic training with PPL1-  
330  $\gamma$ 1pedc or odor-shock conditioning (Figure 6D, Figure 6-figure supplement 1A-B).

331 Memory persistence is often enhanced by repetitive training. However, PPL1- $\gamma$ 1pedc  
332 fails to induce long-lasting memory even after 10x repetitive training at spaced intervals  
333 (Aso & Rubin, 2016). In contrast, other DANs from the PPL1 cluster that do not exhibit  
334 significant NOS expression, PPL1- $\alpha$ 3 or a combination of PPL1- $\gamma$ 2 $\alpha$ '1 and PPL1- $\alpha$ '2 $\alpha$ 2,  
335 are able to induce stable memory lasting for four days after 10x spaced training (Aso &  
336 Rubin, 2016). Our results strongly suggest that NO signaling is responsible for this  
337 difference in memory retention. Spaced training with PPL1- $\gamma$ 1pedc induced memory



338 lasting 1 day when NOS signaling was compromised, either by knockdown with RNAi  
339 (Figure 6E) or inhibition by L-NNA (Figure 6-figure supplement 1C). The valence-  
340 inverted memories formed in the  $\gamma 1$ pedc compartment following repetitive training in TH  
341 mutants also lasted 1 day after training (Figure 6E). Thus, the effects of NOS signaling  
342 accumulate slowly, but can be long lasting. These effects are antagonistic to memories  
343 formed by dopamine signaling, and serve to sculpt the time course of memory retention.  
344 As discussed below, NO-signaling also contributes to other features of memory  
345 dynamics.

#### 346 **Nitric oxide enhances fast updating of memory**

347 We designed behavioral experiments to examine memory dynamics when flies that had  
348 been previously trained encounter a new experience. We tested three different types of  
349 new experience: (1) switching which odor is paired with DAN activation during odor  
350 conditioning (reversal conditioning); (2) exposing flies to odors without DAN activation;  
351 and (3) activating DANs without odor exposure (Figure 7A). In wild-type flies, odor  
352 preference can be altered by a single trial of reversal conditioning with PPL1- $\gamma 1$ pedc  
353 activation (Figure 7B, left), whereas this process became slower and required more  
354 training when NOS was inhibited (Figure 7B; center), such that switching odor  
355 preference required a repetition of reversal conditioning. In TH mutants, NO-dependent  
356 memory was also altered by reversal conditioning, but with an even slower time course  
357 (Figure 7B; right). The second type of new experience, exposure to odors alone, did not  
358 change the existing memory in this assay (Figure 7C). The third type of new experience,  
359 DAN activation alone, quickly reduced conditioned odor response in wild-type flies.

360 Inhibiting NOS slowed this process (Figure 7D; center). NO-dependent memory was also  
361 reduced by unpaired activation of DANs, but it took five trials to detect significant  
362 reduction (Figure 7D; right). These results suggest that both the slow formation and the  
363 persistence of NO-dependent memory facilitate the fast updating of memories stored in  
364 NOS-positive MB compartments in response to changing conditions.

365

### 366 **Modeling the function of NO and DA in memory dynamics**

367 To understand the interplay between DA and NO dependent plasticity, we fit a minimal  
368 model to our data that accounts for the observed effects of these two pathways on  
369 formation of odor memories. We then used this model both to infer the parameters of a  
370 synaptic plasticity rule consistent with the data as well as to test hypotheses about the  
371 mechanisms of DA and NO-mediated synaptic modifications that would be able to  
372 generate the memory dynamics we observed. Imaging and physiology experiments have  
373 demonstrated that DANs induce intracellular signaling cascades in KCs and  
374 bidirectionally modulate the weights of KC-MBON synapses, with the direction of the  
375 plasticity determined by whether each KC is active or inactive (Cohn et al., 2015, Gervasi  
376 et al., 2010, Hattori et al., 2017, Hige et al., 2015, Berry et al., 2018, Boto et al., 2014,  
377 Tomchik and Davis, 2009, Oswald et al., 2015, Bouzaiane et al., 2015)(Cassenaer &  
378 Laurent, 2012; Okada, Rybak, Manz, & Menzel, 2007). This dependence on presynaptic  
379 KC firing ensures the odor-specificity of memories formed following DAN activation.  
380 NO-dependent memories, like DA-dependent memories, are odor-specific, suggesting  
381 that plasticity induced by NO also depends on KC activity. Based on this observation and

382 the results of previous studies, we constructed our model by assuming that: (1) both  
383 dopamine and NO bidirectionally modulate KC-MBON synapses depending on KC  
384 activity, (2) memory decay is due to background levels of DAN activity following  
385 conditioning (Placais et al., 2012, Berry et al., 2015, Sitaraman et al., 2015), and (3) the  
386 effects of DA and NO occur via independent pathways and can coexist (Figure 6).

387 Specifically, we denoted the effects of DA and NO-dependent synaptic plasticity at time  $t$   
388 by two quantities,  $D(t)$  and  $N(t)$ , that lie between 0 and 1. We assumed that coincident  
389 KC-DAN activation increases  $D$  and  $N$  with a timescale of 30 s and 10 min, respectively,  
390 to account for the slower induction of NO-mediated effects (Fig. 8A,B). Based on  
391 previous observations in TH wild type flies that pairing of activation of the PPL1-  $\gamma$ 1pedc  
392 DAN with odor induces synaptic depression between odor activated KCs and MBON-  
393  $\gamma$ 1pedc $>\alpha/\beta$  (Hige et al., 2015), we assumed that the effect of an increase in  $D$  is a  
394 reduction in the weight of the corresponding KC-MBON synapse (Fig. 8B, left). As the  
395 activity of this MBON promotes approach behavior (Aso et al., 2014b, Oswald et al.,  
396 2015), its reduced response to the conditioned odor after DA-dependent synaptic  
397 depression results in avoidance during subsequent odor presentations. In the TH-null  
398 background, in contrast, we have shown that PPL1- $\gamma$ 1pedc activation leads to a positive-  
399 valence memory (Figure 2). This is most readily explained in our model by assuming  
400 that, in such flies, NO induces potentiation of synapses between odor-activated KCs and  
401 MBONs (Fig. 8B, right). Thus, in the model, the effect of an increase in  $N$  is an increase  
402 in synaptic weight, opposite to the effect of  $D$ . Finally, based on observations that  
403 activation of DANs alone can reverse synaptic depression induced by KC-DAN pairing  
404 (Cohn et al., 2015, Hattori et al., 2017, Berry et al., 2018), we assumed that DAN

405 activation in the absence of KC activity causes a reduction in  $D$  and  $N$ , recovering the  
406 synapse to its baseline weight.

407 We fit the model by assuming that the performance index (PI) is determined by the odor-  
408 evoked activation of the MBON and then determining the parameters that best match the  
409 behavioral data reported in Figure 6B-D. We used data that isolates the effects of DA and  
410 NO dependent plasticity mechanisms to fit the parameters for the two pathways  
411 separately (see Methods). In the resulting model, NO-dependent plasticity develops more  
412 gradually and requires more KC-DAN pairings to produce a memory of equal magnitude,  
413 compared to DA-dependent plasticity (Fig. 8C).

414 We next asked how these plasticity mechanisms interact to determine effective KC-to-  
415 MBON synaptic weights when both DA and NO pathways are active. The synaptic  
416 weight is a function of both DA and NO-mediated effects,  $w = f(D, N)$ . One possibility for  
417 the function  $f$  is a difference between terms corresponding to DA-dependent depression  
418 and NO-dependent facilitation; that is,  $w \propto N - D$ . When we fit a model with this  
419 functional form to our data, we found that it incorrectly predicts a reduction in memory  
420 strength after repeated pairings, because of the slower accumulation of NO-dependent  
421 facilitation after DA-dependent potentiation has saturated (Figure 8D, gray curve).

422 Another possibility for  $f$  is a multiplicative form, e.g.  $w \propto (1 - D) \times (1 + N)$ . While we  
423 cannot unambiguously determine the identity of the biophysical parameters underlying  
424 DA and NO-mediated effects, such a form would arise naturally if the two pathways  
425 modulated parameters such as quantal size and the probability of synaptic vesicle release  
426 from KCs. We found that the multiplicative model provides a good match to our data

427 (Figure 8C, blue curve). In this model, strong DA-dependent depression (i.e.  $D$  close to  
428 1) leads to a small synaptic weight even in the presence of NO-dependent facilitation.

429 We further tested our model by investigating its behavior in other paradigms. Assuming  
430 that spontaneous activity in DANs leads to memory decay (Placais et al., 2012, Berry et  
431 al., 2015, Sitaraman et al., 2015) accounted for the NO-dependent reduction in memory  
432 lifetime that we observed (Figure 8E). Fitting the magnitudes of DA-dependent  
433 facilitation and NO-dependent depression in the absence of KC activity using the data of  
434 Figure 7D also predicted the dynamics of reversal learning and its facilitation by NO with  
435 no additional free parameters (Figure 8F). In total, modeling a multiplicative interaction  
436 between DA- and NO-dependent plasticity accounts for the immediate effects of these  
437 pathways on odor memories that we observed experimentally. A notable exception is  
438 that this model cannot account for the enhanced persistence of memories after 10x  
439 training for DA or NO-null conditions (Figure 6E), suggesting a recruitment of additional  
440 consolidation mechanisms after spaced conditioning, as previously proposed (Pagani et  
441 al., 2009, Tully et al., 1994, Pai et al., 2013, Scheunemann et al., 2018, Cervantes-  
442 Sandoval et al., 2013, Miyashita et al., 2018, Huang et al., 2012, Akalal et al., 2011).

443

## 444 **Discussion**

445 Evidence from a wide range of organisms establishes that dopaminergic neurons often  
446 release a second neurotransmitter, but the role of such cotransmitters in diversifying  
447 neuronal signaling is much less clear. In rodents, subsets of dopaminergic neurons co-  
448 release glutamate or GABA (Maher & Westbrook, 2008; Stuber et al., 2010; Sulzer et al.,  
449 1998; Tecuapetla et al., 2010; Tritsch et al., 2012). In mice and *Drosophila*, single-cell  
450 expression profiling reveals expression of diverse neuropeptides in dopaminergic neurons  
451 (Croset et al., 2018; Poulin et al., 2014). EM connectome studies of the mushroom body  
452 in adult and larval *Drosophila* reveal the co-existence of small-clear-core and large-  
453 dense-core synaptic vesicles in individual terminals of dopaminergic neurons (Eichler et  
454 al., 2017; Takemura et al., 2017); moreover, the size of the observed large-dense-core  
455 vesicles differs between DAN cell types (Takemura et al., 2017).

456 We found that NOS, the enzyme that synthesizes NO, was located in the terminals  
457 of a subset of DAN cell types. NOS catalyzes the production of nitric oxide (NO) from L-  
458 arginine. *Drosophila* NOS is regulated by  $Ca^{2+}$ /calmodulin (Regulski & Tully, 1995), as  
459 is the neuronal isoform of NOS in the mammalian brain (Abu-Soud & Stuehr, 1993),  
460 raising the possibility that NO synthesis might be activity dependent. Furthermore, the  
461 localization of the NOS1 protein in the axonal terminals of DANs (Figure 3D) is  
462 consistent with NO serving as a cotransmitter. Our conclusion that NO acts as a  
463 neurotransmitter is supported by the observation that NO signaling requires the presence  
464 of a putative receptor, soluble guanylate cyclase, in the postsynaptic Kenyon cells. This  
465 role contrasts with the proposed cell-autonomous action of NOS in the ellipsoid body, in

466 which NO appears to target proteins within the NOS-expressing ring neurons themselves,  
467 rather than conveying a signal to neighboring cells (Kuntz et al., 2017).

468 The valence-inversion phenotype we observed when PPL1- $\gamma$ 1pedc was  
469 optogenetically activated in a dopamine-deficient background can be most easily  
470 explained if NO induces synaptic potentiation between odor-activated KCs and their  
471 target MBONs. Our modeling work is consistent with this idea, but testing this idea and  
472 other possible mechanisms for NO action will require physiological experiments.

473

#### 474 **Antagonistic functions of dopamine and nitric oxide**

475 During olfactory learning, the concentration of  $Ca^{2+}$  in KC axons represents olfactory  
476 information. The coincidence of a  $Ca^{2+}$  rise in spiking KCs and activation of the G-  
477 protein-coupled Dop1R1 dopamine receptor increases adenylyl cyclase activity (Abrams,  
478 Yovell, Onyike, Cohen, & Jarrard, 1998; Boto, Louis, Jindachomthong, Jalink, &  
479 Tomchik, 2014; Byrne et al., 1991; Kim, Lee, & Han, 2007; McGuire et al., 2003;  
480 Tomchik & Davis, 2009). The resultant cAMP in turn activates protein kinase A (Gervasi  
481 et al., 2010; Skoulakis, Kalderon, & Davis, 1993), a signaling cascade that is important  
482 for synaptic plasticity and memory formation throughout the animal phyla (e.g. Davis,  
483 Cherry, Dauwalder, Han, & Skoulakis, 1995). In contrast, when DANs are activated  
484 without KC activity, and thus during low intracellular  $Ca^{2+}$  in the KCs, molecular  
485 pathways involving the Dop1R2 receptor, Rac1 and Scribble facilitate decay of memory  
486 (Berry, Cervantes-Sandoval, Nicholas, & Davis, 2012; Cervantes-Sandoval, Chakraborty,  
487 MacMullen, & Davis, 2016; Kim et al., 2007; Shuai et al., 2010).

488           We found that NOS in PPL1- $\gamma$ 1pedc shortens memory retention, while facilitating  
489 fast updating of memories in response to new experiences. These observations could be  
490 interpreted as indicating that NO regulates forgetting. However, it is an open question  
491 whether the signaling pathways for forgetting, which presumably induce recovery from  
492 synaptic depression (Berry et al., 2018; Cohn et al., 2015), are related to signaling  
493 cascades downstream of NO and guanylate cyclase, which appear to be able to induce  
494 memory without prior induction of synaptic depression by dopamine. Lack of detectable  
495 1-day memory formation after spaced training with PPL1- $\gamma$ 1pedc can be viewed as a  
496 balance between two distinct, parallel biochemical signals, one induced by dopamine and  
497 the other by NO, rather than the loss of information (that is, forgetting). Confirming this  
498 interpretation will require better understanding of the signaling pathways downstream of  
499 dopamine and NO. The search for such pathways will be informed by the prediction from  
500 our modeling that dopamine and NO may alter two independent parameters that define  
501 synaptic weights with a multiplicative interaction.

502           In the vertebrate cerebellum, which has many architectural similarities to the MB  
503 (Farris, 2011; Marr, 1969; Medina, Repa, Mauk, & LeDoux, 2002), long-term-depression  
504 at parallel fiber-Purkinje cell synapses (equivalent to KC-MBON synapses) induced by  
505 climbing fibers (equivalent to DANs) can coexist with long-term-potentialiation by NO  
506 (Bredt, Hwang, & Snyder, 1990; Lev-Ram, Wong, Storm, & Tsien, 2002; Shibuki &  
507 Okada, 1991). In this case, the unaltered net synaptic weight results from a balance  
508 between coexisting LTD and LTP rather than recovery from LTD. This balance was  
509 suggested to play an important role in preventing memory saturation in the cerebellum  
510 and allowing reversal of motor learning. In the *Drosophila* MB, we observed a similar



511 facilitation of reversal learning by NO (Figure 7B). The antagonistic roles of NO and  
512 synaptic depression may be a yet another common feature of the mushroom body and the  
513 cerebellum.

514

### 515 **Distinct dynamics of dopamine and nitric oxide**

516 Opposing cotransmitters have been observed widely in both invertebrate and vertebrate  
517 neurons (Nusbaum, Blitz, & Marder, 2017). A common feature in these cases is that the  
518 transmitters have distinct time courses of action. For instance, hypothalamic hypocretin-  
519 dynorphin neurons that are critical for sleep and arousal synthesize excitatory hypocretin  
520 and inhibitory dynorphin. When they are released together repeatedly, the distinct  
521 kinetics of their receptors result in an initial outward current, then little current, and then  
522 an inward current in the postsynaptic cells (Y. Li & van den Pol, 2006). In line with these  
523 observations, we found that dopamine and NO show distinct temporal dynamics: NO-  
524 dependent memory requires repetitive training and takes longer to develop than  
525 dopamine-dependent memory. What molecular mechanisms underlie these differences?  
526 Activation of NOS may require stronger or more prolonged DAN activation than does  
527 dopamine release. Alternatively, efficient induction of the signaling cascade in the  
528 postsynaptic KCs might require repetitive waves of NO input. Direct measurements of  
529 release of dopamine and NO, and downstream signaling events by novel sensors will be  
530 needed to address these open questions (Chen, Saulnier, Yellen, & Sabatini, 2014; Eroglu  
531 et al., 2016; Patriarchi et al., 2018; Sun et al., 2018; Tang & Yasuda, 2017).

532

### 533 **Toward subcellular functional mapping of memory genes**

534

535 Decades of behavioral genetic studies have identified more than one hundred genes  
536 underlying olfactory conditioning in *Drosophila* (Keene & Waddell, 2007; McGuire,  
537 Deshazer, & Davis, 2005; Thurmond et al., 2019; Walkinshaw et al., 2015). Mutant and  
538 targeted rescue studies have been used to map the function of many memory-related genes  
539 encoding synaptic or intracellular signaling proteins (for example, rutabaga, DopR1/dumb,  
540 DopR2/DAMB, PKA-C1/DC0, Synapsin, Bruchpilot, Orb2 and Rac1) to specific subsets  
541 of Kenyon cells (Akalal et al., 2006; Berry et al., 2012; A. L. Blum, W. H. Li, M. Cressy,  
542 & J. Dubnau, 2009; Gervasi et al., 2010; Han, Millar, Grotewiel, & Davis, 1996; Kim et  
543 al., 2007; Knapek, Sigrist, & Tanimoto, 2011; Kruttner et al., 2015; McGuire et al., 2003;  
544 Niewalda et al., 2015; Pavot, Carbognin, & Martin, 2015; Qin et al., 2012; Shuai et al.,  
545 2010; Skoulakis et al., 1993; Trannoy et al., 2011; Vanover et al., 2018; Zars et al., 2000).  
546 However, it is largely unknown if these proteins physically colocalize at the same KC  
547 synapses to form intracellular signaling cascades. Some of these proteins might  
548 preferentially localize to specific MB compartments. Alternatively, they may distribute  
549 uniformly along the axon of Kenyon cells, but be activated in only specific compartments.  
550 Our identification of cell-type-specific cotransmitters in DANs enabled us to begin to  
551 explore this question.

552         We used optogenetic activation of specific DANs to induce memory in specific  
553 MB compartments, while manipulating genes in specific types of Kenyon cells. This  
554 approach allowed us to map and characterize the function of memory-related genes at a  
555 subcellular level. For example, the *Gycbeta100B* gene, which encodes a subunit of sGC,  
556 has been identified as “memory suppressor gene” that enhances memory formation when  
557 pan-neuronally knocked down (Walkinshaw et al., 2015), but the site of its action was

558 unknown. Gycbeta100B appears to be broadly dispersed throughout KC axons, based on  
559 the observed distribution of a Gycbeta100B-EGFP fusion protein (Figure 5 -figure  
560 supplement 1). Our experiments ectopically expressing NOS in PPL1- $\alpha$ 3 DANs that do  
561 not normally signal with NO is most easily explained if sGC is available for activation in  
562 all MB compartments (Figure 4D-E).

563         What are the molecular pathways downstream to cGMP? How do dopamine and  
564 NO signaling pathways interact in regulation of KC synapses? Previous studies and  
565 RNA-Seq data suggest several points of possible crosstalk. In cultured KCs from cricket  
566 brains, cGMP-dependent protein kinase (PKG) mediates NO-induced augmentation of a  
567 Ca<sup>2+</sup> channel current (Kosakai, Tsujiuchi, & Yoshino, 2015). However, we failed to  
568 detect expression of either of the genes encoding *Drosophila* PKGs (foraging and  
569 Pkg21D) in KCs in our RNA-Seq studies (Figure 3-figure supplement 2). On the other  
570 hand, cyclic nucleotide-gated channels and the cGMP-specific phosphodiesterase Pde9  
571 are expressed in KCs. Biochemical studies have shown that the activity of sGC is calcium  
572 dependent and that PKA can enhance the NO-induced activity of sGC by phosphorylating  
573 sGC; sGC isolated from flies mutant for adenylate cyclase, *rutabaga*, show lower activity  
574 than sGC from wild-type brains (Morton et al., 2005; Shah & Hyde, 1995), suggesting  
575 crosstalk between the cAMP and cGMP pathways.

576  
577 **The benefits of parallel memory units with heterogeneous dynamics**  
578

579 All memory systems must contend with a tension between the strength and longevity of  
580 the memories they form. The formation of a strong immediate memory interferes with  
581 and shortens the lifetimes of previously formed memories, and reducing this interference

582 requires a reduction in initial memory strength that can only be overcome through  
583 repeated exposure (Amit & Fusi 1994). Theoretical studies have argued that this tension  
584 can be resolved by memory systems that exhibit a heterogeneity of timescales, balancing  
585 the need for both fast, labile memory and slow consolidation of reliable memories (Fusi,  
586 Drew & Abbott 2005, Lahiri & Ganguli 2013, Benna & Fusi 2016). The mechanisms  
587 responsible for this heterogeneity, and whether they arise from complex signaling within  
588 synapses themselves (Benna & Fusi 2016), heterogeneity across brain areas (Roxin &  
589 Fusi 2013), or both, have not been identified.

590

591 We found that NO acts antagonistically to dopamine and reduces memory retention  
592 (Figure 6) while facilitating the rapid updating of memory following a new experience  
593 (Figure 7). Viewed in isolation, the NO-dependent reduction in memory retention within  
594 a single compartment may seem disadvantageous, but in the presence of parallel learning  
595 pathways, this shortened retention may represent a key mechanism for the generation of  
596 multiple memory timescales that are crucial for effective learning. During shock  
597 conditioning, for example, multiple DANs respond to the aversive stimulus, including  
598 PPL1- $\gamma$ 1pedc, PPL1- $\gamma$ 2 $\alpha$ '1, PPL1- $\alpha$ 3 (Mao and Davis, 2009, Riemensperger et al., 2005).  
599 We have shown that optogenetic activation of these DAN cell types individually induces  
600 negative-valence olfactory memory with distinct learning rates (Aso & Rubin, 2016). The  
601 NOS-expressing PPL1- $\gamma$ 1pedc induces memory with the fastest learning rate in a wild-  
602 type background, and we show here that it induces an NO-dependent memory trace when  
603 dopamine synthesis is blocked, with a much slower learning rate and opposite valence.  
604 Robust and stable NO-dependent effects were only observed when training was repeated

605 10 times (Figure 6E). Under such repeated training, compartments with slower learning  
606 rates, such as  $\alpha 3$ , form memory traces in parallel to  $\gamma 1$ pedc (Pai et al., 2013; Sejourne et  
607 al., 2011; Wu et al., 2017). Thus, flies may benefit from the fast and labile memory  
608 formed in  $\gamma 1$ pedc (Figure 7) without suffering the potential disadvantages of shortened  
609 memory retention, as long-term memories are formed in parallel in other compartments.  
610 The *Drosophila* MB provides a tractable experimental system to study the mechanisms  
611 and benefits of diversifying learning rate, retention, and flexibility in parallel memory  
612 units, as well as exploring how the outputs from such units are integrated to drive  
613 behavior.

614

615

616 **Acknowledgements**

617 We thank Jui-Chun Kao, and the Janelia Fly Facility for help with fly husbandry. We  
618 thank Eizaburo Doi, Joshua Dudman, Yichun Shuai, Mehrab Modi, Karen Hibbard  
619 Gowan Tervo, Adam Hantman, Daisuke Hattori, Larry Abbott, Vanessa Ruta, Stott  
620 Waddell, Hiromu Tanimoto, Toshihide Hige, Brett Mensh and Glenn Turner for  
621 stimulating discussions and for comments on earlier drafts of the manuscript. Nikita  
622 Yakubovich and Patrick O'Farrell shared anti-NOS 16 serum pET28a-dNOS exon 16  
623 plasmid. Phil Borden, Gaby Paez, Silvia Sanchez Martinez, Ariana Tkachuk, Tim Brown,  
624 Yan Zhang, Lauren Porter, Jonathan Marvin, and Loren Looger provided guidance on  
625 affinity purification of the anti-NOS antibody. Burkhard Poeck and Roland Strauß shared  
626 confocal images of fly brains stained with anti-NOS. Rebecca Vorimo, Allison Sowell,  
627 Kari Close, Project Technical Resources, and the FlyLight Project Team at Janelia  
628 Research Campus provided brain dissection and histological preparation. The laboratory  
629 of J.H. was supported by NIH R01 GM GM84128.

630

631 **Author Contributions**

632 Y.A. and G.M.R. conceived and designed the study. Y.A. acquired the behavioral and  
633 anatomical data. R.R. and A.L. performed the RNA-Seq data acquisition and analysis.  
634 X.L. performed RNA FISH experiments. A.L.-K. performed computational modeling.  
635 K.C. and J.H. provided key reagents. B. S., T.N. and C.C. provided technical assistance.  
636 Y.A, A.L.-K. and G.M.R. wrote the article.

637

638

639 **Declaration of Interests**

640 The authors declare no competing interests.

641

642 **Materials and methods**

643 **KEY RESOURCES TABLE**

| REAGENT or RESOURCE                                                                  | SOURCE                                                  | IDENTIFIER  |
|--------------------------------------------------------------------------------------|---------------------------------------------------------|-------------|
| <b>Antibodies</b>                                                                    |                                                         |             |
| Mouse monoclonal anti-Brp                                                            | <i>Developmental Studies Hybridoma Bank</i>             | nc82        |
| Mouse monoclonal anti-TH                                                             | Millipore-Sigma                                         | MAB318      |
| Rabbit polyclonal anti-NOS exon 16                                                   | Yakubovich et al., 2010<br>PMID: 20178753<br>This paper | N.A.        |
| Chicken polyclonal anti-GFP                                                          | abcam                                                   | ab13970     |
| Goat anti-Rabbit IgG (H+L) Highly Cross-Adsorbed Secondary Antibody, Alexa Fluor 568 | Invitrogen                                              | A-11036     |
| Goat anti-Chicken IgY (H+L) Secondary Antibody, Alexa Fluor 488                      | Invitrogen                                              | A-11039     |
| Anti-Mouse IgG (H&L) (Goat), ATTO 647N conjugated                                    | ROCKLAND antibodies & assays                            | 610-156-121 |
| <b>Bacterial and Virus Strains</b>                                                   |                                                         |             |
| T7 Express lysY/lq                                                                   | New England BioLabs                                     | C3013       |
| <b>Chemicals, Peptides, and Recombinant Proteins</b>                                 |                                                         |             |
| S(-)-Carbidopa                                                                       | Millipore-Sigma                                         | C1335       |
| L-DOPA                                                                               | Millipore-Sigma                                         | D9628       |
| L-NNA (Nu-nitro-L-arginin)                                                           | Millipore-Sigma                                         | N5501       |
| Schneider's Drosophila Medium                                                        | Thermo Fisher Scientific                                | 21720024    |
| RU-486                                                                               | Millipore-Sigma                                         | 475838      |
| Cy@5 Mono                                                                            | GE Healthcare                                           | PA25001     |
| Cy@3 Mono                                                                            | GE Healthcare                                           | PA23001     |
| RNase-free water: Molecular Biology Grade Water                                      | Corning                                                 | 46-000-CM   |
| RNase-free 1x PBS                                                                    | Fisher                                                  | BP2438-4    |
| CH3COOH: Acetic Acid                                                                 | Fisher                                                  | A38S-500    |
| NaBH4: Sodium borohydride, 99%, VenPure™ SF powder                                   | Acros Organics                                          | AC448481000 |
| 20xSSC                                                                               | Fisher                                                  | AM9763      |
| Hi-Di formamide                                                                      | Applied Biosystems                                      | 4440753     |
| 50x Denhardt's solution                                                              | Alfa Aesar                                              | AAJ63135AD  |
| tRNA: baker's yeast                                                                  | Roche                                                   | 10109495001 |
| UltraPure™ Salmon Sperm DNA Solution                                                 | ThermoFisher                                            | 15632011    |
| 10% SDS                                                                              | Corning                                                 | 46-040-CI   |
| Formamide (Deionized)                                                                | Ambion                                                  | AM9342      |
| Liberase DH                                                                          | Roche                                                   | 5401054001  |
| <b>Critical Commercial Assays</b>                                                    |                                                         |             |
| PicoPure RNA Isolation Kit                                                           | Life Technologies                                       | NEG772014MC |
| AminoLink Immobilization Kit                                                         | Thermo Scientific                                       | #44890      |
| <b>Experimental Models: Organisms/Strains</b>                                        |                                                         |             |
| <i>D. melanogaster</i> : 20xUAS-CsChrimson-mVenus attP18                             | Klapoetke et al., 2014<br>PMID: 24509633                | N.A.        |
| <i>D. melanogaster</i> : ple2, DTHFS <sup>+/-</sup> BAC in attP2                     | Cichewicz et al., 2017<br>PMID: 27762066                | N.A.        |



|                                                                                                                                                         |                                                                                            |       |
|---------------------------------------------------------------------------------------------------------------------------------------------------------|--------------------------------------------------------------------------------------------|-------|
| <i>D. melanogaster</i> : UAS-DTH                                                                                                                        | Cichewicz et al., 2017<br>PMID: 27762066                                                   | N.A.  |
| <i>D. melanogaster</i> : TH-ZpGAL4DBD in VK00027                                                                                                        | Aso et al., 2014a<br>PMID: 25535793                                                        | N.A.  |
| <i>D. melanogaster</i> : DDC-ZpGAL4DBD in VK00027                                                                                                       | Aso et al., 2014a<br>PMID: 25535793                                                        | N.A.  |
| <i>D. melanogaster</i> : R52H03-p65ADZp attP40                                                                                                          | Aso et al., 2014a<br>PMID: 25535793                                                        | N.A.  |
| <i>D. melanogaster</i> : R58E02-p65ADZp attP40                                                                                                          | Aso et al., 2014a<br>PMID: 25535793                                                        | N.A.  |
| <i>D. melanogaster</i> : Gr66a-LexA                                                                                                                     | Aso et al., 2014a<br>PMID: 25535793                                                        | N.A.  |
| <i>D. melanogaster</i> : 13xLexAop2-CsChrimson-mVenus attP18                                                                                            | Klapoetke et al., 2014<br>PMID: 24509633                                                   | N.A.  |
| <i>D. melanogaster</i> : pBPp65ADZpUw attP40                                                                                                            | Seeds et al., 2014<br>PMID: 25139955                                                       | N.A.  |
| <i>D. melanogaster</i> : VT045661-LexAp65 in JK22C                                                                                                      | Aso et al., 2016<br>PMID: 27441388                                                         | N.A.  |
| <i>D. melanogaster</i> : R73F07-p65ADZp attP40                                                                                                          | Aso et al., 2014a<br>PMID: 25535793                                                        | N.A.  |
| <i>D. melanogaster</i> : R72B05-p65ADZp attP40                                                                                                          | Aso et al., 2014a<br>PMID: 25535793                                                        | N.A.  |
| <i>D. melanogaster</i> : R24E12-p65ADZp attP40                                                                                                          | Aso et al., 2014a<br>PMID: 25535793                                                        | N.A.  |
| <i>D. melanogaster</i> : UAS-NOS-shRNA strain#1<br>y[1] sc[*] v[1]; P{y[+t7.7] v[+t1.8]=TRiP.HMC03076}attP2<br>(VALIUM20 vector; TCGGAGCAATATGCGAAGCAA) | Bloomington Drosophila<br>Stock Center                                                     | 50675 |
| <i>D. melanogaster</i> : UAS-NOS-shRNA strain#2<br>SH09526.N in attP40<br>(VALIUM20 vector; ACCACTGGACATTATCAGCTA)                                      | this study;<br>Parkins et al., 2015<br>PMID: 26320097                                      | N.A.  |
| <i>D. melanogaster</i> : RNAi background for attP2                                                                                                      | Bloomington Drosophila<br>Stock Center                                                     | 36303 |
| <i>D. melanogaster</i> : RNAi background for attP40                                                                                                     | Bloomington Drosophila<br>Stock Center                                                     | 36304 |
| <i>D. melanogaster</i> : UAS-NOS                                                                                                                        | Bloomington Drosophila<br>Stock Center                                                     | 56823 |
| <i>D. melanogaster</i> : MB-Switch                                                                                                                      | Mao et al., 2004<br>PMID: 14684832                                                         | N.A.  |
| <i>D. melanogaster</i> : Gycbeta100B-RNAi<br>w; P{y[+t7.7] v[+t1.8]=TRiP.HMJ22589}attP40                                                                | Bloomington Drosophila<br>Stock Center                                                     | N.A.  |
| <i>D. melanogaster</i> : Gycbeta100B[MI08892-GFSTF.2]                                                                                                   | Bloomington Drosophila<br>Stock Center<br>Nagarkar-Jaiswal et al., 2015,<br>PMID: 25824290 | 60565 |
| <i>D. melanogaster</i> : MB320C-split-GAL4                                                                                                              | Aso et al., 2014a<br>PMID: 25535793                                                        | N.A.  |
| <i>D. melanogaster</i> : UAS-7xHalo7::CAAX in attP40                                                                                                    | Bloomington Drosophila<br>Stock Center<br>Sutcliffe et al., 2017<br>PMID: 28209589         | 67621 |
| Oligonucleotides                                                                                                                                        |                                                                                            |       |
| NOS FISH prob#01_CGCGCCGCAAGCTCAAGA                                                                                                                     | Biosearch Technologies                                                                     | N.A.  |
| NOS FISH prob#02_CCTAGCGCGACTTTTGAC                                                                                                                     | Biosearch Technologies                                                                     | N.A.  |
| NOS FISH prob#03_TCTGGTGTGTCTCTATT                                                                                                                      | Biosearch Technologies                                                                     | N.A.  |
| NOS FISH prob#04_AACAGTCACTTCACTGGC                                                                                                                     | Biosearch Technologies                                                                     | N.A.  |
| NOS FISH prob#05_TCTTCTCACCTCTCTTA                                                                                                                      | Biosearch Technologies                                                                     | N.A.  |
| NOS FISH prob#06_ACTTCGTTAACTCAGCC                                                                                                                      | Biosearch Technologies                                                                     | N.A.  |

|                                      |                                           |      |
|--------------------------------------|-------------------------------------------|------|
| NOS FISH prob#07_CTCGGCGTCTTTCAAACG  | Biosearch Technologies                    | N.A. |
| NOS FISH prob#08_ACCTCCCATTTAACAGGT  | Biosearch Technologies                    | N.A. |
| NOS FISH prob#09_ACCAAGTGGACAACCGAC  | Biosearch Technologies                    | N.A. |
| NOS FISH prob#10_TTGCTCCGTTTGTAGTC   | Biosearch Technologies                    | N.A. |
| NOS FISH prob#11_CTCGACGAGGTGCAAGGG  | Biosearch Technologies                    | N.A. |
| NOS FISH prob#12_CGTTTCTACAGCGTCGTA  | Biosearch Technologies                    | N.A. |
| NOS FISH prob#13_TTGACGCTAAGCACTGG   | Biosearch Technologies                    | N.A. |
| NOS FISH prob#14_CGTGTCTGTGTCGTTGTT  | Biosearch Technologies                    | N.A. |
| NOS FISH prob#15_GTTTTGAGTTCGTTGCGG  | Biosearch Technologies                    | N.A. |
| NOS FISH prob#16_CAACTTACCGTTACCCGA  | Biosearch Technologies                    | N.A. |
| NOS FISH prob#17_ACTCGCCGTTAGGTTTAC  | Biosearch Technologies                    | N.A. |
| NOS FISH prob#18_GCCACTGAGGAGCGGGTC  | Biosearch Technologies                    | N.A. |
| NOS FISH prob#19_TACTTCACCTGGTAGGCC  | Biosearch Technologies                    | N.A. |
| NOS FISH prob#20_GTGTTCCCTCGAGTTCGTC | Biosearch Technologies                    | N.A. |
| NOS FISH prob#21_CCTCCGAACGGTAGAAGT  | Biosearch Technologies                    | N.A. |
| NOS FISH prob#22_CGGTAACTCCGTGGTGTT  | Biosearch Technologies                    | N.A. |
| NOS FISH prob#23_CGCGGTCATAGAGGTGTC  | Biosearch Technologies                    | N.A. |
| NOS FISH prob#24_AGCGGAGGTTAGGCGCTT  | Biosearch Technologies                    | N.A. |
| NOS FISH prob#25_CGTGGTTGTGGTCGTAGC  | Biosearch Technologies                    | N.A. |
| NOS FISH prob#26_CAGCTTGACCTACCGTCA  | Biosearch Technologies                    | N.A. |
| NOS FISH prob#27_ACCGCAACCGCAACCAAGT | Biosearch Technologies                    | N.A. |
| NOS FISH prob#28_CACGCCAACAGGAGGGGA  | Biosearch Technologies                    | N.A. |
| NOS FISH prob#29_GACGTGACGCAGGCCTTT  | Biosearch Technologies                    | N.A. |
| NOS FISH prob#30_CAAGCGCCCTTGATAGCG  | Biosearch Technologies                    | N.A. |
| NOS FISH prob#31_AGCGGCTTTTTGGTTGTC  | Biosearch Technologies                    | N.A. |
| NOS FISH prob#32_CGGGTCTTTCTACAGTGT  | Biosearch Technologies                    | N.A. |
| NOS FISH prob#33_TAATAGCCAGCGCACGGC  | Biosearch Technologies                    | N.A. |
| NOS FISH prob#34_AATACGTGGACCTGCTGC  | Biosearch Technologies                    | N.A. |
| NOS FISH prob#35_GTCAGACGACTACGCGTT  | Biosearch Technologies                    | N.A. |
| NOS FISH prob#36_CTGACTTCTGTAGTCC    | Biosearch Technologies                    | N.A. |
| NOS FISH prob#37_CTCCAGATGCTGTGCGAC  | Biosearch Technologies                    | N.A. |
| NOS FISH prob#38_GACGTTCCAGCGCTCTA   | Biosearch Technologies                    | N.A. |
| NOS FISH prob#39_AAAGGACGAGCTTCCGGT  | Biosearch Technologies                    | N.A. |
| NOS FISH prob#40_ACATGCTCGTCGTAATAC  | Biosearch Technologies                    | N.A. |
| Recombinant DNA                      |                                           |      |
| pET28a-dNOS exon 16                  | Yakubovich et al., 2010<br>PMID: 20178753 | N.A. |
| pRSET-dNOS exon 16                   | This paper                                | N.A. |
| Software and Algorithms              |                                           |      |
| DE-seq2                              | Love et al., 2014<br>PMID: 25516281       | N.A. |

|        |                                           |      |
|--------|-------------------------------------------|------|
| Fiji   | Schindelin et al., 2012<br>PMID: 22743772 | N.A. |
| MATLAB | MathWorks                                 | N.A. |
| Prism  | GraphPad                                  | N.A. |

644

## 645 **Flies**

646 *Drosophila* strains used in this study are listed in the KEY RESOURCES TABLE. Crosses  
647 were kept on standard cornmeal food supplemented with retinal (0.2 mM all-trans-retinal  
648 prior to eclosion and then 0.4 mM) at 21°C at 60% relative humidity in the dark. Female  
649 flies were sorted on cold plates at least 1 d prior to the experiments, and 4-10 d old flies  
650 were used for experiments. Additional drugs were administered by feeding with retinal  
651 containing fly food mixed with drugs. The L-DOPA (D9628, Sigma) or L-NNA were mixed  
652 directly into melted fly food at final concentrations of 1 mg/ml or 1-100mM, respectively.  
653 S(-)-Carbidopa (C1335, Sigma) was dissolved in 1 ml of water at 10x the final  
654 concentration and mixed with 9 ml of melted fly food.

## 655 **Olfactory learning assay**

656 Groups of approximately 20 female flies, 4–10 d post-eclosion, were trained and tested at  
657 25°C at 50% relative humidity in the fully automated olfactory arena for optogenetics  
658 experiments (Aso & Rubin, 2016; Pettersson, 1970; Vet, Vanlenteren, Heymans, & Meelis,  
659 1983). The odors were diluted in paraffin oil (Sigma–Aldrich): 3-octanol (OCT; 1:1000;  
660 Merck) and 4-methylcyclohexanol (MCH; 1:750; Sigma–Aldrich). Videography was  
661 performed at 30 frames per second and analyzed using Fiji (Schindelin et al., 2012).  
662 Statistical comparisons were performed (Prism; Graphpad Inc, La Jolla, CA 92037) using  
663 the Kruskal Wallis test followed by Dunn's post-test for multiple comparison, except those  
664 in Figure 6 which used Wilcoxon signed-rank test with Bonferroni correction to compare  
665 from zero.

666

## 667 **Immunohistochemistry**

668 Dissection and immunohistochemistry of fly brains were carried out as previously described  
669 with minor modifications (Jenett et al., 2012) using the antibodies listed in KEY  
670 RESOURCES TABLE. Brains and VNCs of 3- to 10-day old female flies were dissected in  
671 Schneider's insect medium and fixed in 2% paraformaldehyde in Schneider's medium for 55  
672 min at room temperature (RT). After washing in PBT (0.5% Triton X-100 in PBS), tissues  
673 were blocked in 5% normal goat serum (or normal donkey serum, depending on the  
674 secondary antibody) for 90 min. Subsequently, tissues were incubated in primary antibodies  
675 diluted in 5% serum in PBT for 2–4 days on a nutator at 4°C, washed four times in PBT for  
676 15 min or longer, then incubated in secondary antibodies diluted in 5% serum in PBT for 2–  
677 4 days on a Nutator at 4°C. Tissues were washed thoroughly in PBT four times for 15 min  
678 or longer and mounted on glass slides with DPX.

679 For immunolabeling of NOS, the serum against NOS exon 16 was obtained from N.  
680 Yakuobovich and P. H. O'Farrell (Yakubovich et al., 2010), and then affinity purified as  
681 described below. In order to minimize non-specific signals, we absorbed 200 µL of anti-  
682 NOS antibody (1:1000) for one day with 30 fly brains in which NOS was knocked down  
683 panneuronally using elav-GAL4 and NOS-RNAi strain#1 (TRiP.HMC03076), and the  
684 supernatant was used for subsequent immunohistochemistry.

685

## 686 **Purification of dNOS proteins and antibody**

687 The pRSET-dNOS exon 16 construct, containing an N-terminal His tag and T7 gene 10  
688 leader RBS site, was assembled as follows. The NEBuilder Assembly tool was used to

689 design primers for the NEBuilder HiFi DNA assembly (New England Biolabs # E2621S)  
690 of dNOS exon 16 as contained in pET28a-dNOS exon 16 (gift of Nikita Yakubovich, O-  
691 Farrell lab, UCSF) into the backbone vector pRSET (gift of Ariana Tkachuk, Janelia)  
692 which was digested with BamHI/EcoRI. The assembled product, pRSET-dNOS exon 16,  
693 was first transformed into NEB 5-alpha competent cells (New England Biolabs  
694 #E2621S) and plated on LB plus ampicillin (60 µl/ml).

695 For protein purification, pRSET-dNOS exon 16 DNA was then transformed into  
696 T7 Express lysY/lq *E.coli* protein expression cells (New England Biolabs #C3013) and  
697 plated on LB plus ampicillin (60 µl/ml). For large-scale growth, 500 ml of Miller's LB  
698 plus ampicillin (60 µl/ml) was inoculated from 5 ml of a starter culture and grown for  
699 ~3 hrs (~O.D. 0.5-0.7) at 37 °C and then induced by adding 0.5 mM IPTG. The culture  
700 was allowed to grow at 18-20 °C overnight before spinning down and freezing the  
701 recovered pellets which were divided in two 250 ml bottles.

702 To resuspend the thawed pellets (frozen overnight), 10-12 ml of the nonionic detergent-  
703 based lysis reagent B-PER (Thermo Scientific #78266) in phosphate buffer containing  
704 1mg/ml of lysozyme (Thermo Scientific #89833), nuclease (0.1 µl/ml, Thermo Scientific  
705 # 88701), and 1X HALT protease inhibitors (Thermo Scientific #1861279). The  
706 suspension, divided into two 50 ml conical tubes, was gently shaken for 15-20 min at 30  
707 °C before spinning down at 8,000 x g for 15 mins at 4 °C. We found that that the majority  
708 of the dNOS exon 16 protein was in inclusion bodies and therefore we carried out  
709 purification starting with the pellet .

710 Each pellet was resuspended in ~10 ml B-PER containing 200 µg/ml lysozyme.  
711 The suspension was then mixed with 100 ml of a wash buffer containing 1:10 B-PER in

712 ice cold 1xPBS (diluted from 10X PBS stock, Fisher Scientific #BP3994) by pipetting  
713 the mixture up and down and gentle agitation. The mixture was spun down at 15,000  
714 rpm for 15 min at 4 °C. The pellet was similarly washed four more times. The washed  
715 pellet was either stored at -20 °C overnight or resuspended in 7-12 ml of inclusion  
716 body solubilization reagent (Thermo Scientific #78115 ). The protein suspension was  
717 shaken for 30-40 min at 20 °C and then ultracentrifuged at 35,000 x g for 20-30 min at  
718 4 °C.

719 For affinity purification of anti-dNOS antibody, the supernatant fraction was  
720 concentrated using 50 ml conical tubes Vivaspin 20, 10,000 MWCO concentrators  
721 (Sartorius # VS2002) and then dialyzed in 3-12 ml dialysis cassettes 10,000 MWCO  
722 (Thermo Scientific #66810) against 1L of 4M guanidine HCL (diluted from 6M stock,  
723 Sigma #SRE0066) in 1X PBS pH 8.0 for ~ 6 hours at 4 °C. The medium was further  
724 diluted to 2M guanidine HCL and the protein continued to dialyze overnight. Affinity  
725 purification of the protein-antibody complex was performed using the AminoLink  
726 Immobilization Kit (Thermo Scientific #44890). Approximately 6 mg of soluble dNOS  
727 exon 16 protein in 2M guanidine in 1X PBS was bound to the agarose beads in the  
728 column as antigen, and 1.9 ml of crude rabbit anti sera to dNOS exon 16 (gift of Nikita  
729 Yakubovich of Patrick O-Farrell's lab) was run through the column. The purified dNOS  
730 exon 16 rabbit anti-antibody fractions were eluted with IgG Elution buffer (Thermo  
731 Scientific # 21004) and then concentrated with Vivaspin 20 tube concentrators before  
732 dialyzed in 1XPBS at 4 °C for 2.5 days with one change of fresh 1X PBS.

733

734 **FISH**

735 The fluorescence in situ hybridization (FISH) probe libraries were designed based on  
736 transcript sequences and were purchased from Biosearch Technologies. The FISH protocol  
737 and dye labeling procedures were described previously (Long et al., 2017). FISH probes for  
738 detecting tyrosine hydroxylase transcripts were described (Meissner et al., 2019). FISH  
739 probes for NOS are listed in KEY RESOURCES TABLE. Each probe contains a 3'-end  
740 amine-modified nucleotide that allows directly couple to an NHS-ester Cy3 dye (GE  
741 Healthcare, PA23001) according to the manufacturer's instructions. The brains of 3-5 d old  
742 adult flies were dissected in 1xPBS and fixed in 2% paraformaldehyde diluted PBS at room  
743 temperature for 55 min. Brain tissues were washed in 0.5% PBT, dehydrated, and stored in  
744 100% ethanol at 4°C. After exposure to 5% acetic acid at 4 °C for 5 min, the tissues were  
745 fixed in 2% paraformaldehyde in 1xPBS for 55 min at 25 °C. The tissues were then washed  
746 in 1× PBS with 1% of NaBH<sub>4</sub> at 4 °C for 30 min. Following a 2 h incubation in  
747 prehybridization buffer (15% formamide, 2× SSC, 0.1% Triton X-100) at 50 °C, the brains  
748 were introduced to hybridization buffer (10% formamide, 2x SSC, 5x Denhardt's solution, 1  
749 mg/ml yeast tRNA, 100 µg/ml, salmon sperm DNA, 0.1% SDS) containing FISH probes at  
750 50 °C for 10 h and then at 37 °C for an additional 10 h. After a series of wash steps, the  
751 brains were dehydrated, cleared in xylene, and mounted in DPX. Image Z-stacks were  
752 collected using an LSM880 confocal microscope fitted with an LD LCI Plan-Apochromat  
753 25x/0.8 oil or Plan-Apochromat 63x/1.4 oil objective after the tissue cured for 24 h.

754

## 755 **RNA-Seq**

756 *Expression checks*

757 Neurons of interest were isolated by expressing a fluorescent protein, either mCD8-GFP  
758 or tdTomato, using split-Gal4 drivers specific for particular cell types and then manually  
759 picking the fluorescent neurons from dissociated brain tissue. As a preliminary to the  
760 sorting process, each driver/reporter combination was ‘expression checked’ to determine  
761 if the marked cells were sufficiently bright to sorted effectively and if there was any off-  
762 target expression in neurons other than those of interest. Drivers that met both these  
763 requirements were used in sorting experiments as described below.

764

#### 765 *Sorting of fluorescent-labelled neurons*

766 *Drosophila* adults were collected daily as they eclosed, and aged 3-5 days prior to  
767 dissection. For each sample, 60-100 brains were dissected in freshly prepared, ice cold  
768 Adult Hemolymph Solution (AHS; 108 mM NaCl, 5 mM KCl, 2 mM CaCl<sub>2</sub>, 8.2 mM  
769 MgCl<sub>2</sub>, 4 mM NaHCO<sub>3</sub>, 1 mM NaH<sub>2</sub>PO<sub>4</sub>, 5 mM HEPES, 6 mM Trehalose, 10 mM  
770 Sucrose), and the major tracheal branches removed. The brains were transferred to an 1.5  
771 ml Eppendorf tube containing 500 microliters 1 mg/ml Liberase DH (Roche, prepared  
772 according to the manufacturer’s recommendation) in AHS, and digested for 1 h at room  
773 temperature. The Liberase solution was removed and the brains washed three times with  
774 ice cold AHS. The final wash was removed completely and 400 microliters of AHS+2%  
775 Fetal Bovine Serum (FBS, Sigma) were added. The brain samples were gently triturated  
776 with a series of fire-polished, FBS-coated Pasteur pipettes of descending pore sizes until  
777 the tissue was homogenized, after which the tube was allowed to stand for 2-3 m so that  
778 the larger debris could settle.



779 For hand sorting, the cell suspension was transferred to a Sylgard-lined Glass  
780 Bottom Dish (Willco Wells), leaving the debris at the bottom of the Eppendorf tube, and  
781 distributed evenly in a rectangular area in the center of the plate with the pipet tip. The  
782 cells were allowed to settle for 10-30 min prior to picking. Fluorescent cells were picked  
783 with a mouth aspirator consisting of a 0.8 mm Nalgene Syringe Filter (Thermo), a short  
784 stretch of tubing, a plastic needle holder, and a pulled Kwik-Fil Borosilicate Glass  
785 capillary (Fisher). Cells picked off the primary plate were transferred to a Sylgard-lined  
786 35 mm Mat Tek Glass Bottom Microwell Dishes (Mat Tek) filled with 170 microliters  
787 AHS+2%FBS, allowed to settle, and then re-picked. Three washes were performed in this  
788 way before the purified cells were picked and transferred into 50 microliters buffer XB  
789 from the PicoPure RNA Isolation Kit (Life Technologies), lysed for 5 m at 42°C, and  
790 stored at -80°C.

791 For FACS sorting, the cell suspension was passed through a Falcon 5 ml round-  
792 bottom tube fitted with a 35 micrometer cell strainer cap (Fisher), and sorted on a Becton  
793 Dickson FACSaria II cell sorter, gated for single cells with a fluorescence intensity  
794 exceeding that of a non-fluorescent control. Positive events were sorted directly into 50  
795 microliters PicoPure XB buffer, the sample lysed for 5 m at 42°C, and stored at -80°C.

796

#### 797 *Library preparation and sequencing*

798 Total RNA was extracted from 100-500 pooled cells using the PicoPure kit (Life  
799 Technologies) according to the manufacturer's recommendation, including the on-  
800 column DNase step. The extracted RNA was converted to cDNA and amplified with the  
801 Ovation RNA-Seq System V2 (NuGEN), and the yield quantified by NanoDrop

802 (Thermo). The cDNA was fragmented and the sequencing adaptors ligated onto the  
803 fragments using the Ovation Rapid Library System (NuGEN). Library quality and  
804 concentration was determined with the Kapa Illumina Library Quantification Kit  
805 (KK4854, Kapa Biosystems), and the libraries were pooled and sequenced on an Illumina  
806 NextSeq 550 with 75 base pair reads. Sequencing adapters were trimmed from the reads  
807 with Cutadapt (Martin, 2011) prior to alignment with STAR (Dobin et al., 2013) to the  
808 *Drosophila* r6.17 genome assembly on Flybase (Thurmond et al., 2019). The resulting  
809 transcript alignments were passed to RSEM (B. Li & Dewey, 2011) to generate gene  
810 expression counts.

811

## 812 **Modeling**

### 813 *Inferring parameters of DA and NO plasticity*

814 We assume that the immediate effects of DA-mediated and NO-mediated changes at a  
815 KC-to-MBON synapse are described by two variables  $d(t)$  and  $n(t)$ , respectively. When  
816 the KC and corresponding DAN are coactive, these variables are modified according to:

$$\begin{aligned} 817 \quad \frac{d}{dt} d(t) &= A_D(1 - d(t)) \\ 818 \quad \frac{d}{dt} n(t) &= A_N(1 - n(t)) \end{aligned} \quad (1)$$

819 When the DAN is active but the KC is inactive,

$$\begin{aligned} 820 \quad \frac{d}{dt} d(t) &= -B_D d(t) \\ 821 \quad \frac{d}{dt} n(t) &= -B_N n(t) \end{aligned} \quad (2)$$

822 A and B determine how quickly the variables approach their maximum value of 1 or  
823 minimum value of 0.

824 To model the time it takes for the effects of synaptic plasticity to occur, we also define  
825 two additional variables

$$\begin{aligned} 826 \quad \tau_D \frac{d}{dt} D(t) &= d(t) - D(t) \\ 827 \quad \tau_N \frac{d}{dt} N(t) &= n(t) - N(t) \end{aligned} \quad (3)$$

828

829  $D(t)$  and  $N(t)$  follow the values of  $d(t)$  and  $n(t)$ , but with slower timescales  $\tau_D$  and  $\tau_N$   
830 respectively. Based on the data, we assume  $\tau_D = 30$  (s), and  $\tau_N = 10$  (min). This accounts  
831 for the slower induction of NO-mediated effects.

832 We start by inferring AD and AN from data by relating the values of  $D(t)$  and  $N(t)$  in our  
833 model to the activation of the MBON, and finally to the PI. We assume that the

834 normalized KC-to-MBON synaptic weight is given by  $w(t) \propto 1 - D(t)$  (DA-mediated

835 depression) if NO is absent, or  $w(t) \propto 1 + N(t)$  (NO-dependent facilitation) if DA is

836 absent. In our model, odors A and B activate a random 10% of KCs (the results do not

837 depend on the total number of KCs  $N_{KC}$ ), and the activation of the MBON is given by  $r =$

838  $r = \frac{1}{N_{KC}} \sum_i w_i s_i$ , where  $s_i = 1$  if the  $i$ th KC is active and 0 otherwise. At the beginning

839 of each trial,  $D(t) = N(t) = 0$ , so  $w_i = 1$ . If  $r_A$  and  $r_B$  are the MBON activations for odors A

840 and B, then we assume the probability of the fly choosing odor A is equal to a softmax

841 function of this activation:

$$842 \quad P_{odorA} = \frac{e^{gr_A}}{e^{gr_A} + e^{gr_B}}$$

843 We also infer  $g$ , which determines how strongly the MBON activation influences the

844 decision, with  $g = 0$  corresponding to random choices.

845 We infer  $A_D$ ,  $A_N$ , and  $g$  separately for DA-null and NO-null conditions. To do so, we  
846 determine the values of the parameters that minimize the mean squared distance between  
847 model prediction and experimentally measured PIs for the 1x 10s, 1x 1min, 3x 1min, and  
848 10x 1min protocols (Figure 6B). This is accomplished by simulating the model defined  
849 by Equations Eq. 1 to Eq. 3 and calculating the resulting preference index using Equation  
850 Eq. 4. Optimal values for  $A_D$ ,  $A_N$ , and  $g$  are found using a grid search. The optimization  
851 leads to  $A_D = 4.3$  ( $\text{min}^{-1}$ ) and  $A_N = 0.96$  ( $\text{min}^{-1}$ ) (the inferred values of  $g$  are similar for the  
852 two cases; 14.8 and 12.6, respectively). These values indicate that the DA effect saturates  
853 more quickly than the NO effect, nearly reaching its maximum effect after 1x 1min  
854 pairing.

855 Next, we model synaptic weights when both DA and NO-dependent changes occur. We  
856 consider two forms of interaction, an additive one with  $w(t) \propto N(t) - D(t)$  and a  
857 multiplicative one with  $w(t) \propto (1 - D(t))(1 + N(t))$ . We use the values of  $A_D$  and  $A_N$   
858 inferred previously but allow  $g$  to be readjusted to best match the data (for the  
859 multiplicative model,  $g = 14.3$ , similar to above, while for the additive model  $g = 24.6$ ).  
860 Only the multiplicative model qualitatively matches the experimental data (Figure 8D).

#### 861 *Modeling memory decay after 1x 1 min pairing*

862 Next, we ask how memory decays after a pairing protocol. We assume that, after the  
863 pairing protocol is complete, there is a background level of activity in the DANs, which  
864 leads to depression according  
865 to Eq. 2. We infer the values of  $B_D^{bg}$  and  $B_N^{bg}$  (where the superscript denotes decay due to  
866 background DAN activity) using a grid search to minimize the mean squared distance  
867 between the predicted and actual PI from Figure 6D. Other parameters are set to the

868 previously determined values using the multiplicative model above. This leads to  $B_D^{bg} =$   
869  $2.7 (10^{-3} \text{ min}^{-1})$  and  $B_D^{bg} = 1.6 (10^{-3} \text{ min}^{-1})$ .

### 870 *Predicting memory dynamics in reversal learning*

871 Finally, we also model the effects of different pairing protocols. We start by considering  
872 DAN ac- tivation in the absence of odor. We infer values for  $B_D$  and  $B_N$  (different from  
873 the background levels above, since DANs are now activated rather than at their  
874 background levels of activation) by minimizing the mean squared difference between  
875 predicted and actual PI for NO-null and DA-null conditions (Figure 7F), and with the  
876 remaining parameters determined previously for the multi- plicative model. This yields  
877  $B_D = 0.26 (\text{min}^{-1})$  and  $B_N = 0.16 (\text{min}^{-1})$ . These parameters are used to predict the  
878 behavior during reversal learning (Figure 7F).

879

880

881

882

883

884

885 Supplemental Information

886 SUPPLEMENTAL FILE 1 RNA-seq data

887

888

889 SUPPLEMENTAL TABLE 1

| Figure                                                    | Genotype                                                                                                                                                                        | Drug and other treatments                               |
|-----------------------------------------------------------|---------------------------------------------------------------------------------------------------------------------------------------------------------------------------------|---------------------------------------------------------|
| Figure 1D top                                             | <i>w, 20xUAS-CsChrimson-mVenus in attP18/w; R52H03-p65ADZp attP40/+; TH-ZpGAL4DBD in VK00027/+</i>                                                                              |                                                         |
| Figure 1E top                                             | <i>w, 20xUAS-CsChrimson-mVenus in attP18/w; R52H03-p65ADZp attP40/+; TH-ZpGAL4DBD in VK00027, ple2, DTHFS<sup>+/-</sup> in attP2/ ple2, DTHFS<sup>+/-</sup> in attP2</i>        |                                                         |
| Figure 1F top                                             | <i>w, 20xUAS-CsChrimson-mVenus in attP18/w; R52H03-p65ADZp attP40/+; TH-ZpGAL4DBD in VK00027, ple2, DTHFS<sup>+/-</sup> in attP2/ ple2, DTHFS<sup>+/-</sup> in attP2</i>        | 1mg/ml L-Dopa, 0.1 mg/ml S(-)-Carbidopa for 12-16 hours |
| Figure 1G top                                             | <i>w, 20xUAS-CsChrimson-mVenus in attP18/w; R52H03-p65ADZp attP40/UAS-dTH; TH-ZpGAL4DBD in VK00027, ple2, DTHFS<sup>+/-</sup> in attP2/ ple2, DTHFS<sup>+/-</sup> in attP2</i>  |                                                         |
| Figure 1D bottom                                          | <i>w, 20xUAS-CsChrimson-mVenus in attP18/w; R58E02-p65ADZp attP40/+; DDC-ZpGAL4DBD in VK00027/+</i>                                                                             |                                                         |
| Figure 1E bottom                                          | <i>w, 20xUAS-CsChrimson-mVenus in attP18/w; R58E02-p65ADZp attP40/+; DDC-ZpGAL4DBD in VK00027, ple2, DTHFS<sup>+/-</sup> in attP2/ ple2, DTHFS<sup>+/-</sup> in attP2</i>       |                                                         |
| Figure 1F bottom                                          | <i>w, 20xUAS-CsChrimson-mVenus in attP18/w; R58E02-p65ADZp attP40/+; DDC-ZpGAL4DBD in VK00027, ple2, DTHFS<sup>+/-</sup> in attP2/ ple2, DTHFS<sup>+/-</sup> in attP2</i>       | 1mg/ml L-Dopa, 0.1 mg/ml S(-)-Carbidopa for 12-16 hours |
| Figure 1G bottom                                          | <i>w, 20xUAS-CsChrimson-mVenus in attP18/w; R58E02-p65ADZp attP40/UAS-dTH; DDC-ZpGAL4DBD in VK00027, ple2, DTHFS<sup>+/-</sup> in attP2/ ple2, DTHFS<sup>+/-</sup> in attP2</i> |                                                         |
| Figure 1-figure supplement 1 PAM Wild type                | <i>w, 20xUAS-CsChrimson-mVenus in attP18/w; R58E02-p65ADZp attP40/+; DDC-ZpGAL4DBD in VK00027/+</i>                                                                             |                                                         |
| Figure 1- figure supplement 1 PAM Dopamine null           | <i>w, 20xUAS-CsChrimson-mVenus in attP18/w; R58E02-p65ADZp attP40/+; DDC-ZpGAL4DBD in VK00027, ple2, DTHFS<sup>+/-</sup> in attP2/ ple2, DTHFS<sup>+/-</sup> in attP2</i>       |                                                         |
| Figure 1- figure supplement 1 PAM Dopamine null TH rescue | <i>w, 20xUAS-CsChrimson-mVenus in attP18/w; R58E02-p65ADZp attP40/UAS-dTH; DDC-ZpGAL4DBD in VK00027, ple2, DTHFS<sup>+/-</sup> in attP2/ ple2, DTHFS<sup>+/-</sup> in attP2</i> |                                                         |
| Figure 1-figure supplement 1 PPL1 Dopamine null           | <i>w, 20xUAS-CsChrimson-mVenus in attP18/w; R52H03-p65ADZp attP40/+; TH-ZpGAL4DBD in VK00027, ple2, DTHFS<sup>+/-</sup> in attP2/ ple2, DTHFS<sup>+/-</sup> in attP2</i>        |                                                         |
| Figure 1- figure supplement 1 PPL1 TH rescue              | <i>w, 20xUAS-CsChrimson-mVenus in attP18/w; R52H03-p65ADZp attP40/UAS-dTH; TH-ZpGAL4DBD in VK00027, ple2, DTHFS<sup>+/-</sup> in attP2/ ple2, DTHFS<sup>+/-</sup> in attP2</i>  |                                                         |
| Figure 2                                                  | <i>w, 20xUAS-CsChrimson-mVenus in attP18/w; Gr66a-GAL4/+; +/- ple2, DTHFS<sup>+/-</sup> in attP2</i>                                                                            |                                                         |
| Figure 2                                                  | <i>w, 20xUAS-CsChrimson-mVenus in attP18/w; Gr66a-GAL4/+; ple2, DTHFS<sup>+/-</sup> in attP2/ TH-ZpGAL4DBD in VK00027, ple2, DTHFS<sup>+/-</sup> in attP2</i>                   |                                                         |
| Figure 2                                                  | <i>w, 20xUAS-CsChrimson-mVenus in attP18/w; R52H03-p65ADZp attP40/+; +/-TH-ZpGAL4DBD in VK00027, ple2, DTHFS<sup>+/-</sup> in attP2</i>                                         |                                                         |
| Figure 2                                                  | <i>w, 20xUAS-CsChrimson-mVenus in attP18/w; R52H03-p65ADZp attP40/+; ple2, DTHFS<sup>+/-</sup> in attP2/TH-ZpGAL4DBD in VK00027, ple2, DTHFS<sup>+/-</sup> in attP2</i>         |                                                         |
| Figure 2                                                  | <i>w, 13xLeXAop-CsChrimson-tdTomato attP18/w; VT045661-LexA JK22C/+; +/-TH-ZpGAL4DBD in VK00027, ple2, DTHFS<sup>+/-</sup> in attP2</i>                                         |                                                         |
| Figure 2                                                  | <i>w, 13xLeXAop-CsChrimson-tdTomato attP18/w; VT045661-LexA JK22C/+; ple2, DTHFS<sup>+/-</sup> in attP2/ TH-ZpGAL4DBD in VK00027, ple2, DTHFS<sup>+/-</sup> in attP2</i>        |                                                         |
| Figure 2                                                  | <i>w, 20xUAS-CsChrimson-mVenus in attP18/w; R73F07-p65ADZp attP40/+; +/-TH-ZpGAL4DBD in VK00027, ple2, DTHFS<sup>+/-</sup> in attP2</i>                                         |                                                         |
| Figure 2                                                  | <i>w, 20xUAS-CsChrimson-mVenus in attP18/w; R73F07-p65ADZp attP40/+; ple2, DTHFS<sup>+/-</sup> in attP2/TH-ZpGAL4DBD in VK00027, ple2, DTHFS<sup>+/-</sup> in attP2</i>         |                                                         |
| Figure 2                                                  | <i>w, 20xUAS-CsChrimson-mVenus in attP18/w; R72B05-p65ADZp attP40/+; +/-TH-ZpGAL4DBD in VK00027, ple2, DTHFS<sup>+/-</sup> in attP2</i>                                         |                                                         |

|                                      |                                                                                                                                                                                                  |                                                                                                                                    |
|--------------------------------------|--------------------------------------------------------------------------------------------------------------------------------------------------------------------------------------------------|------------------------------------------------------------------------------------------------------------------------------------|
| Figure 2                             | <i>w, 20xUAS-CsChrimson-mVenus in attP18/w; R72B05-p65ADZp attP40/+; ple2, DTHFS<sup>+/-</sup> in attP2/TH-ZpGAL4DBD in VK00027, ple2, DTHFS<sup>+/-</sup> in attP2</i>                          |                                                                                                                                    |
| Figure 2                             | <i>w, 20xUAS-CsChrimson-mVenus in attP18/w; R24E12-p65ADZp attP40/+; +/DDC-ZpGAL4DBD in VK00027, ple2, DTHFS<sup>+/-</sup> in attP2</i>                                                          |                                                                                                                                    |
| Figure 2                             | <i>w, 20xUAS-CsChrimson-mVenus in attP18/w; R24E12-p65ADZp attP40/+; ple2, DTHFS<sup>+/-</sup> in attP2/DDC-ZpGAL4DBD in VK00027, ple2, DTHFS<sup>+/-</sup> in attP2</i>                         |                                                                                                                                    |
| Figure 2                             | <i>w, 20xUAS-CsChrimson-mVenus in attP18/w; R58E02-p65ADZp attP40/+; TH-ZpGAL4DBD in VK00027/+</i>                                                                                               |                                                                                                                                    |
| Figure 2                             | <i>w, 20xUAS-CsChrimson-mVenus in attP18/w; R58E02-p65ADZp attP40/+; ple2, DTHFS<sup>+/-</sup> in attP2/TH-ZpGAL4DBD in VK00027, ple2, DTHFS<sup>+/-</sup> in attP2</i>                          |                                                                                                                                    |
| Figure 2                             | <i>w, 20xUAS-CsChrimson-mVenus in attP18/w; R58E02-p65ADZp attP40/+; +/DDC-ZpGAL4DBD in VK00027, ple2, DTHFS<sup>+/-</sup> in attP2</i>                                                          |                                                                                                                                    |
| Figure 2                             | <i>w, 20xUAS-CsChrimson-mVenus in attP18/w; R58E02-p65ADZp attP40/+; ple2, DTHFS<sup>+/-</sup> in attP2/DDC-ZpGAL4DBD in VK00027, ple2, DTHFS<sup>+/-</sup> in attP2</i>                         |                                                                                                                                    |
| Figure 2- figure supplement 1 left   | <i>w, 20xUAS-CsChrimson-mVenus in attP18/w; R73F07-p65ADZp attP40/+; +/TH-ZpGAL4DBD in VK00027, ple2, DTHFS<sup>+/-</sup> in attP2</i>                                                           |                                                                                                                                    |
| Figure 2- figure supplement 1 center | <i>w, 20xUAS-CsChrimson-mVenus in attP18/w; R72B05-p65ADZp attP40/+; +/TH-ZpGAL4DBD in VK00027, ple2, DTHFS<sup>+/-</sup> in attP2</i>                                                           |                                                                                                                                    |
| Figure 2- figure supplement 1 right  | <i>w, 20xUAS-CsChrimson-mVenus in attP18/w; R24E12-p65ADZp attP40/+; +/DDC-ZpGAL4DBD in VK00027, ple2, DTHFS<sup>+/-</sup> in attP2</i>                                                          |                                                                                                                                    |
| Figure 3D                            | <i>w, 20xUAS-CsChrimson-mVenus in attP18/w; +/MB320C</i>                                                                                                                                         |                                                                                                                                    |
| Figure 3E                            | CS                                                                                                                                                                                               |                                                                                                                                    |
| Figure 3-figure supplement 1B        | <i>w, 20xUAS-CsChrimson-mVenus in attP18/w; background attP2 (BDSC#36303)/MB320C</i>                                                                                                             |                                                                                                                                    |
| Figure 3-figure supplement 1B        | <i>w, 20xUAS-CsChrimson-mVenus in attP18/w; UAS-NOS-shRNA HMC03076 in attP2/MB320C</i>                                                                                                           |                                                                                                                                    |
| Figure 3-figure supplement 1C        | CS                                                                                                                                                                                               |                                                                                                                                    |
| Figure 3- figure supplement 1D       | <i>w/w; UAS-7xHalo7::CAAX in attP40/+; MB320C/+</i>                                                                                                                                              |                                                                                                                                    |
| Figure 4A                            | <i>w, 13xLeXAop-CsChrimson-tdTomato attP18/w; VT045661-LexA JK22C/+; ple2, DTHFS<sup>+/-</sup> in attP2/TH-ZpGAL4DBD in VK00027, ple2, DTHFS<sup>+/-</sup> in attP2</i>                          | 0-100 mM L-NNA, 100 mM L-NNA + 1mg/ml L-Dopa, 0.1 mg/ml S(-)-Carbidopa, or 1mg/ml L-Dopa, 0.1 mg/ml S(-)-Carbidopa for 12-16 hours |
| Figure 4B left                       | <i>w, 20xUAS-CsChrimson-mVenus in attP18/w; R58E02-p65ADZp attP40/+; TH-ZpGAL4DBD in VK00027, ple2, DTHFS<sup>+/-</sup> in attP2/ ple2, DTHFS<sup>+/-</sup> in attP2</i>                         | 0 or 100 mM L-NNA for 12-16 hours                                                                                                  |
| Figure 4B right                      | <i>w, 20xUAS-CsChrimson-mVenus in attP18/w; R73F07-p65ADZp attP40/+; TH-ZpGAL4DBD in VK00027, ple2, DTHFS<sup>+/-</sup> in attP2/ ple2, DTHFS<sup>+/-</sup> in attP2</i>                         | 0 or 100 mM L-NNA for 12-16 hours                                                                                                  |
| Figure 4C left                       | <i>w, 20xUAS-CsChrimson-mVenus in attP18/w; R52H03-p65ADZp attP40/background control attP40; TH-ZpGAL4DBD in VK00027, ple2, DTHFS<sup>+/-</sup> in attP2/ ple2, DTHFS<sup>+/-</sup> in attP2</i> |                                                                                                                                    |
| Figure 4C right                      | <i>w, 20xUAS-CsChrimson-mVenus in attP18/w; R52H03-p65ADZp attP40/UAS-NOS-shRNA in attP40; TH-ZpGAL4DBD in VK00027, ple2, DTHFS<sup>+/-</sup> in attP2/ ple2, DTHFS<sup>+/-</sup> in attP2</i>   |                                                                                                                                    |
| Figure 4D and E left                 | <i>w, 20xUAS-CsChrimson-mVenus in attP18/w; R72B05-p65ADZp attP40/+; TH-ZpGAL4DBD in VK00027, ple2, DTHFS<sup>+/-</sup> in attP2/ ple2, DTHFS<sup>+/-</sup> in attP2</i>                         |                                                                                                                                    |
| Figure 4D and E right                | <i>w, 20xUAS-CsChrimson-mVenus in attP18/w; R72B05-p65ADZp attP40/UAS-NOS; TH-ZpGAL4DBD in VK00027, ple2, DTHFS<sup>+/-</sup> in attP2/ ple2, DTHFS<sup>+/-</sup> in attP2</i>                   |                                                                                                                                    |
| Figure 5C left                       | <i>w, 13xLeXAop-CsChrimson-tdTomato attP18/w; VT045661-LexA JK22C/background control attP40; MB-switch-GAL4, ple2, DTHFS<sup>+/-</sup> in attP2 /ple2, DTHFS<sup>+/-</sup> in attP2</i>          | 0 or 1.5 mg/mL RU486 for 2 days                                                                                                    |
| Figure 5C center                     | <i>w, 13xLeXAop-CsChrimson-tdTomato attP18/w; VT045661-LexA JK22C/UAS-Gybeta100B-shRNA in attP40; MB-switch-GAL4, ple2, DTHFS<sup>+/-</sup> in attP2 /ple2, DTHFS<sup>+/-</sup> in attP2</i>     | 0 or 1.5 mg/mL RU486 for 2 days                                                                                                    |
| Figure 5C right                      | <i>w, 13xLeXAop-CsChrimson-tdTomato attP18/w; VT045661-LexA JK22C/UAS-Gybeta100B-shRNA in attP40; MB-switch-GAL4, ple2, DTHFS<sup>+/-</sup> in attP2 /ple2, DTHFS<sup>+/-</sup> in attP2</i>     | 0 or 1.5 mg/mL RU486 and 1mg/ml L-Dopa, 0.1 mg/ml S(-)-Carbidopa for 2 days                                                        |
| Figure 5- figure supplement 1 left   | <i>yw; Gybeta100B[Mi08892-GFSTF.2]</i>                                                                                                                                                           |                                                                                                                                    |
| Figure 5- figure supplement 1 right  | CS                                                                                                                                                                                               |                                                                                                                                    |

|                                         |                                                                                                                                                                         |                                  |
|-----------------------------------------|-------------------------------------------------------------------------------------------------------------------------------------------------------------------------|----------------------------------|
| Figure 6B Wild Type                     | <i>w, 13xLeXAop-CsChrimson-tdTomato attp18/w; VT045661-LexA JK22C/+; +/-; +/+</i>                                                                                       |                                  |
| Figure 6B L-NNA                         | <i>w, 13xLeXAop-CsChrimson-tdTomato attp18/w; VT045661-LexA JK22C/+; +/-; +/+</i>                                                                                       | 100mM L-NNA for 12-16 hours      |
| Figure 6B DA null                       | <i>w, 13xLeXAop-CsChrimson-tdTomato attp18/w; VT045661-LexA JK22C/+; ple2, DTHFS<sup>+/-</sup> in attP2/TH-ZpGAL4DBD in VK00027, ple2, DTHFS<sup>+/-</sup> in attP2</i> |                                  |
| Figure 6C                               | <i>w, 13xLeXAop-CsChrimson-tdTomato attp18/w; VT045661-LexA JK22C/+; ple2, DTHFS<sup>+/-</sup> in attP2/TH-ZpGAL4DBD in VK00027, ple2, DTHFS<sup>+/-</sup> in attP2</i> |                                  |
| Figure 6D                               | <i>w, 20xUAS-CsChrimson-mVenus in attP18/w;; background attP2 (BDSC#36303)/MB320C</i>                                                                                   |                                  |
| Figure 6D                               | <i>w, 20xUAS-CsChrimson-mVenus in attP18/w;; UAS-NOS-shRNA HMC03076 in attP2/MB320C</i>                                                                                 |                                  |
| Figure 6E left                          | <i>w, 20xUAS-CsChrimson-mVenus in attP18/yw;; background attP2 (BDSC#36303)/MB320C</i>                                                                                  |                                  |
| Figure 6E center                        | <i>w, 20xUAS-CsChrimson-mVenus in attP18/yw;; UAS-NOS-shRNA HMC03076 in attP2/MB320C</i>                                                                                |                                  |
| Figure 6E right                         | <i>w, 13xLeXAop-CsChrimson-tdTomato attp18/w; VT045661-LexA JK22C/+; ple2, DTHFS<sup>+/-</sup> in attP2/TH-ZpGAL4DBD in VK00027, ple2, DTHFS<sup>+/-</sup> in attP2</i> |                                  |
| Figure 6-figure supplement 1A           | <i>w, 13xLeXAop-CsChrimson-tdTomato attp18/w; VT045661-LexA JK22C/+; +/-</i>                                                                                            |                                  |
| Figure 6-figure supplement 1B control   | <i>w/yw;; background attP2 (BDSC#36303)/MB320C</i>                                                                                                                      |                                  |
| Figure 6- figure supplement 1B NOS-RNAi | <i>w/yw;;UAS-NOS-shRNA HMC03076 in attP2/MB320C</i>                                                                                                                     |                                  |
| Figure 6- figure supplement 1C          | <i>w, 13xLeXAop-CsChrimson-tdTomato attp18/w; VT045661-LexA JK22C/+; +/-</i>                                                                                            | 0 or 100mM L-NNA for 12-16 hours |
| Figure 7B-E Wild Type                   | <i>w, 13xLeXAop-CsChrimson-tdTomato attp18/w; VT045661-LexA JK22C/+; +/-; +/+</i>                                                                                       |                                  |
| Figure 7B-E L-NNA                       | <i>w, 13xLeXAop-CsChrimson-tdTomato attp18/w; VT045661-LexA JK22C/+; +/-; +/+</i>                                                                                       | 100mM L-NNA for 12-16 hours      |
| Figure 7B-E DA null                     | <i>w, 13xLeXAop-CsChrimson-tdTomato attp18/w; VT045661-LexA JK22C/+; ple2, DTHFS<sup>+/-</sup> in attP2/TH-ZpGAL4DBD in VK00027, ple2, DTHFS<sup>+/-</sup> in attP2</i> |                                  |

890

891

892

893



894 **References**

895

- 896 Abrams, T. W., Yovell, Y., Onyike, C. U., Cohen, J. E., & Jarrard, H. E. (1998). Analysis of  
897 sequence-dependent interactions between transient calcium and transmitter  
898 stimuli in activating adenylyl cyclase in *Aplysia*: possible contribution to CS--  
899 US sequence requirement during conditioning. *Learn Mem*, *4*(6), 496-509.
- 900 Abu-Soud, H. M., & Stuehr, D. J. (1993). Nitric oxide synthases reveal a role for  
901 calmodulin in controlling electron transfer. *Proc Natl Acad Sci U S A*, *90*(22),  
902 10769-10772.
- 903 Akalal, D. B., Wilson, C. F., Zong, L., Tanaka, N. K., Ito, K., & Davis, R. L. (2006). Roles  
904 for *Drosophila* mushroom body neurons in olfactory learning and memory.  
905 *Learn Mem*, *13*(5), 659-668. doi:10.1101/lm.221206
- 906 Aso, Y., Hattori, D., Yu, Y., Johnston, R. M., Iyer, N. A., Ngo, T. T., . . . Rubin, G. M.  
907 (2014). The neuronal architecture of the mushroom body provides a logic for  
908 associative learning. *Elife*, *3*, e04577. doi:10.7554/eLife.04577
- 909 Aso, Y., Herb, A., Ogueta, M., Siwanowicz, I., Templier, T., Friedrich, A. B., . . .  
910 Tanimoto, H. (2012). Three dopamine pathways induce aversive odor  
911 memories with different stability. *PLoS Genet*, *8*(7), e1002768.  
912 doi:10.1371/journal.pgen.1002768
- 913 Aso, Y., & Rubin, G. M. (2016). Dopaminergic neurons write and update memories  
914 with cell-type-specific rules. *Elife*, *5*. doi:10.7554/eLife.16135
- 915 Aso, Y., Sitaraman, D., Ichinose, T., Kaun, K. R., Vogt, K., Belliart-Guerin, G., . . . Rubin,  
916 G. M. (2014). Mushroom body output neurons encode valence and guide  
917 memory-based action selection in *Drosophila*. *Elife*, *3*, e04580.  
918 doi:10.7554/eLife.04580
- 919 Aso, Y., Siwanowicz, I., Bracker, L., Ito, K., Kitamoto, T., & Tanimoto, H. (2010).  
920 Specific dopaminergic neurons for the formation of labile aversive memory.  
921 *Curr Biol*, *20*(16), 1445-1451. doi:10.1016/j.cub.2010.06.048
- 922 Berry, J. A., Cervantes-Sandoval, I., Nicholas, E. P., & Davis, R. L. (2012). Dopamine is  
923 required for learning and forgetting in *Drosophila*. *Neuron*, *74*(3), 530-542.  
924 doi:10.1016/j.neuron.2012.04.007
- 925 Berry, J. A., Phan, A., & Davis, R. L. (2018). Dopamine Neurons Mediate Learning and  
926 Forgetting through Bidirectional Modulation of a Memory Trace. *Cell Rep*,  
927 *25*(3), 651-662 e655. doi:10.1016/j.celrep.2018.09.051
- 928 Blum, A. L., Li, W., Cressy, M., & Dubnau, J. (2009). Short- and long-term memory in  
929 *Drosophila* require cAMP signaling in distinct neuron types. *Curr Biol*, *19*(16),  
930 1341-1350. doi:10.1016/j.cub.2009.07.016
- 931 Blum, A. L., Li, W. H., Cressy, M., & Dubnau, J. (2009). Short- and Long-Term Memory  
932 in *Drosophila* Require cAMP Signaling in Distinct Neuron Types. *Current*  
933 *Biology*, *19*(16), 1341-1350. doi:Doi 10.1016/J.Cub.2009.07.016
- 934 Boto, T., Louis, T., Jindachomthong, K., Jalink, K., & Tomchik, S. M. (2014).  
935 Dopaminergic modulation of cAMP drives nonlinear plasticity across the

- 936 *Drosophila* mushroom body lobes. *Curr Biol*, 24(8), 822-831.  
937 doi:10.1016/j.cub.2014.03.021
- 938 Bouzaiane, E., Trannoy, S., Scheunemann, L., Placais, P. Y., & Preat, T. (2015). Two  
939 independent mushroom body output circuits retrieve the six discrete  
940 components of *Drosophila* aversive memory. *Cell Rep*, 11(8), 1280-1292.  
941 doi:10.1016/j.celrep.2015.04.044
- 942 Bredt, D. S., Hwang, P. M., & Snyder, S. H. (1990). Localization of nitric oxide  
943 synthase indicating a neural role for nitric oxide. *Nature*, 347(6295), 768-  
944 770. doi:10.1038/347768a0
- 945 Burke, C. J., Huetteroth, W., Oswald, D., Perisse, E., Krashes, M. J., Das, G., . . . Waddell,  
946 S. (2012). Layered reward signalling through octopamine and dopamine in  
947 *Drosophila*. *Nature*, 492(7429), 433-437. doi:10.1038/nature11614
- 948 Byrne, J. H., Baxter, D. A., Buonomano, D. V., Cleary, L. J., Eskin, A., Goldsmith, J. R., . . .  
949 Scholz, K. P. (1991). Neural and molecular bases of nonassociative and  
950 associative learning in *Aplysia*. *Ann N Y Acad Sci*, 627, 124-149.
- 951 Cassenaer, S., & Laurent, G. (2012). Conditional modulation of spike-timing-  
952 dependent plasticity for olfactory learning. *Nature*, 482(7383), 47-U62.  
953 doi:Doi 10.1038/Nature10776
- 954 Cervantes-Sandoval, I., Chakraborty, M., MacMullen, C., & Davis, R. L. (2016).  
955 Scribble Scaffolds a Signalosome for Active Forgetting. *Neuron*, 90(6), 1230-  
956 1242. doi:10.1016/j.neuron.2016.05.010
- 957 Chen, Y., Saulnier, J. L., Yellen, G., & Sabatini, B. L. (2014). A PKA activity sensor for  
958 quantitative analysis of endogenous GPCR signaling via 2-photon FRET-FLIM  
959 imaging. *Front Pharmacol*, 5, 56. doi:10.3389/fphar.2014.00056
- 960 Cichewicz, K., Garren, E. J., Adiele, C., Aso, Y., Wang, Z., Wu, M., . . . Hirsh, J. (2016). A  
961 new brain dopamine-deficient *Drosophila* and its pharmacological and  
962 genetic rescue. *Genes Brain Behav*. doi:10.1111/gbb.12353
- 963 Claridge-Chang, A., Roorda, R. D., Vrontou, E., Sjulson, L., Li, H., Hirsh, J., &  
964 Miesenbock, G. (2009). Writing memories with light-addressable  
965 reinforcement circuitry. *Cell*, 139(2), 405-415. doi:10.1016/j.cell.2009.08.034
- 966 Cohn, R., Morante, I., & Ruta, V. (2015). Coordinated and Compartmentalized  
967 Neuromodulation Shapes Sensory Processing in *Drosophila*. *Cell*, 163(7),  
968 1742-1755. doi:10.1016/j.cell.2015.11.019
- 969 Croset, V., Treiber, C. D., & Waddell, S. (2018). Cellular diversity in the *Drosophila*  
970 midbrain revealed by single-cell transcriptomics. *Elife*, 7.  
971 doi:10.7554/eLife.34550
- 972 Das, G., Klappenbach, M., Vrontou, E., Perisse, E., Clark, C. M., Burke, C. J., & Waddell,  
973 S. (2014). *Drosophila* learn opposing components of a compound food  
974 stimulus. *Curr Biol*, 24(15), 1723-1730. doi:10.1016/j.cub.2014.05.078
- 975 Davis, R. L., Cherry, J., Dauwalder, B., Han, P. L., & Skoulakis, E. (1995). The cyclic  
976 AMP system and *Drosophila* learning. *Mol Cell Biochem*, 149-150, 271-278.
- 977 Debelle, J. S., & Heisenberg, M. (1994). Associative Odor Learning in *Drosophila*  
978 Abolished by Chemical Ablation of Mushroom Bodies. *Science*, 263(5147),  
979 692-695. doi:Doi 10.1126/Science.8303280

- 980 Dobin, A., Davis, C. A., Schlesinger, F., Drenkow, J., Zaleski, C., Jha, S., . . . Gingeras, T. R.  
981 (2013). STAR: ultrafast universal RNA-seq aligner. *Bioinformatics*, *29*(1), 15-  
982 21. doi:10.1093/bioinformatics/bts635
- 983 Dubnau, J., Grady, L., Kitamoto, T., & Tully, T. (2001). Disruption of  
984 neurotransmission in *Drosophila* mushroom body blocks retrieval but not  
985 acquisition of memory. *Nature*, *411*(6836), 476-480. doi:10.1038/35078077
- 986 Eichler, K., Li, F., Litwin-Kumar, A., Park, Y., Andrade, I., Schneider-Mizell, C. M., . . .  
987 Cardona, A. (2017). The complete connectome of a learning and memory  
988 centre in an insect brain. *Nature*, *548*(7666), 175-182.  
989 doi:10.1038/nature23455
- 990 Erber, J., MASUHR, T., & MENZEL, R. (1980). Localization of short-term memory in  
991 the brain of the bee, *Apis mellifera*. *Physiological Entomology*, *5*(4).  
992 doi:10.1111/j.1365-3032.1980.tb00244.x
- 993 Eroglu, E., Gottschalk, B., Charoensin, S., Blass, S., Bischof, H., Rost, R., . . . Malli, R.  
994 (2016). Development of novel FP-based probes for live-cell imaging of nitric  
995 oxide dynamics. *Nat Commun*, *7*, 10623. doi:10.1038/ncomms10623
- 996 Farris, S. M. (2011). Are mushroom bodies cerebellum-like structures? *Arthropod*  
997 *Struct Dev*, *40*(4), 368-379. doi:10.1016/j.asd.2011.02.004
- 998 Fred P. Davis<sup>1,\*</sup>, Aljoscha Nern<sup>1,\*</sup>, Serge Picard<sup>1,3</sup>, Michael B. Reiser<sup>1</sup>, Gerald M.  
999 Rubin<sup>1</sup>, Sean R. Eddy<sup>1,4</sup>, and Gilbert L. Henry<sup>1,5,X</sup>. (2018). A genetic,  
1000 genomic, and computational resource for exploring neural circuit function.  
1001 *bioRxiv*.
- 1002 Galili, D. S., Dylla, K. V., Ludke, A., Friedrich, A. B., Yamagata, N., Wong, J. Y., . . .  
1003 Tanimoto, H. (2014). Converging circuits mediate temperature and shock  
1004 aversive olfactory conditioning in *Drosophila*. *Curr Biol*, *24*(15), 1712-1722.  
1005 doi:10.1016/j.cub.2014.06.062
- 1006 Gervasi, N., Tchenio, P., & Preat, T. (2010). PKA dynamics in a *Drosophila* learning  
1007 center: coincidence detection by rutabaga adenylyl cyclase and spatial  
1008 regulation by dunce phosphodiesterase. *Neuron*, *65*(4), 516-529.  
1009 doi:10.1016/j.neuron.2010.01.014
- 1010 Han, K. A., Millar, N. S., Grotewiel, M. S., & Davis, R. L. (1996). DAMB, a novel  
1011 dopamine receptor expressed specifically in *Drosophila* mushroom bodies.  
1012 *Neuron*, *16*(6), 1127-1135.
- 1013 Heisenberg, M. (2003). Mushroom body memoir: From maps to models. *Nature*  
1014 *Reviews Neuroscience*, *4*(4), 266-275. doi:10.1038/Nrn1074
- 1015 Herry, C., & Johansen, J. P. (2014). Encoding of fear learning and memory in  
1016 distributed neuronal circuits. *Nat Neurosci*, *17*(12), 1644-1654.  
1017 doi:10.1038/nn.3869
- 1018 Hige, T., Aso, Y., Modi, M. N., Rubin, G. M., & Turner, G. C. (2015). Heterosynaptic  
1019 Plasticity Underlies Aversive Olfactory Learning in *Drosophila*. *Neuron*, *88*(5),  
1020 985-998. doi:10.1016/j.neuron.2015.11.003
- 1021 Huetteroth, W., Perisse, E., Lin, S., Klappenbach, M., Burke, C., & Waddell, S. (2015).  
1022 Sweet taste and nutrient value subdivide rewarding dopaminergic neurons  
1023 in *Drosophila*. *Curr Biol*, *25*(6), 751-758. doi:10.1016/j.cub.2015.01.036

- 1024 Ichinose, T., Aso, Y., Yamagata, N., Abe, A., Rubin, G. M., & Tanimoto, H. (2015).  
1025 Reward signal in a recurrent circuit drives appetitive long-term memory  
1026 formation. *Elife*, 4. doi:10.7554/eLife.10719
- 1027 Isabel, G., Pascual, A., & Preat, T. (2004). Exclusive consolidated memory phases in  
1028 *Drosophila*. *Science*, 304(5673), 1024-1027. doi:10.1126/science.1094932
- 1029 Kanao, T., Sawada, T., Davies, S. A., Ichinose, H., Hasegawa, K., Takahashi, R., . . . Imai,  
1030 Y. (2012). The nitric oxide-cyclic GMP pathway regulates FoxO and alters  
1031 dopaminergic neuron survival in *Drosophila*. *PLoS One*, 7(2), e30958.  
1032 doi:10.1371/journal.pone.0030958
- 1033 Keene, A. C., & Waddell, S. (2007). *Drosophila* olfactory memory: single genes to  
1034 complex neural circuits. *Nature Reviews Neuroscience*, 8(5), 341-354. doi:Doi  
1035 10.1038/Nrn2098
- 1036 Kim, Y. C., Lee, H. G., & Han, K. A. (2007). D1 dopamine receptor dDA1 is required in  
1037 the mushroom body neurons for aversive and appetitive learning in  
1038 *Drosophila*. *J Neurosci*, 27(29), 7640-7647. doi:10.1523/JNEUROSCI.1167-  
1039 07.2007
- 1040 Kirkhart, C., & Scott, K. (2015). Gustatory learning and processing in the *Drosophila*  
1041 mushroom bodies. *J Neurosci*, 35(15), 5950-5958.  
1042 doi:10.1523/JNEUROSCI.3930-14.2015
- 1043 Knapek, S., Sigrist, S., & Tanimoto, H. (2011). Bruchpilot, a synaptic active zone  
1044 protein for anesthesia-resistant memory. *J Neurosci*, 31(9), 3453-3458.  
1045 doi:10.1523/JNEUROSCI.2585-10.2011
- 1046 Kosakai, K., Tsujiuchi, Y., & Yoshino, M. (2015). Nitric oxide augments single Ca(2+)  
1047 channel currents via cGMP-dependent protein kinase in Kenyon cells isolated  
1048 from the mushroom body of the cricket brain. *J Insect Physiol*, 78, 26-32.  
1049 doi:10.1016/j.jinsphys.2015.04.009
- 1050 Krashes, M. J., DasGupta, S., Vreede, A., White, B., Armstrong, J. D., & Waddell, S.  
1051 (2009). A Neural Circuit Mechanism Integrating Motivational State with  
1052 Memory Expression in *Drosophila*. *Cell*, 139(2), 416-427. doi:Doi  
1053 10.1016/J.Cell.2009.08.035
- 1054 Kruttner, S., Traunmuller, L., Dag, U., Jandrasits, K., Stepien, B., Iyer, N., . . . Keleman,  
1055 K. (2015). Synaptic Orb2A Bridges Memory Acquisition and Late Memory  
1056 Consolidation in *Drosophila*. *Cell Rep*, 11(12), 1953-1965.  
1057 doi:10.1016/j.celrep.2015.05.037
- 1058 Kuntz, S., Poeck, B., & Strauss, R. (2017). Visual Working Memory Requires  
1059 Permissive and Instructive NO/cGMP Signaling at Presynapses in the  
1060 *Drosophila* Central Brain. *Curr Biol*, 27(5), 613-623.  
1061 doi:10.1016/j.cub.2016.12.056
- 1062 Lev-Ram, V., Wong, S. T., Storm, D. R., & Tsien, R. Y. (2002). A new form of cerebellar  
1063 long-term potentiation is postsynaptic and depends on nitric oxide but not  
1064 cAMP. *Proc Natl Acad Sci U S A*, 99(12), 8389-8393.  
1065 doi:10.1073/pnas.122206399
- 1066 Li, B., & Dewey, C. N. (2011). RSEM: accurate transcript quantification from RNA-Seq  
1067 data with or without a reference genome. *BMC Bioinformatics*, 12, 323.  
1068 doi:10.1186/1471-2105-12-323

- 1069 Li, Y., & van den Pol, A. N. (2006). Differential target-dependent actions of  
1070 coexpressed inhibitory dynorphin and excitatory hypocretin/orexin  
1071 neuropeptides. *J Neurosci*, *26*(50), 13037-13047.  
1072 doi:10.1523/JNEUROSCI.3380-06.2006
- 1073 Lin, S., Oswald, D., Chandra, V., Talbot, C., Huetteroth, W., & Waddell, S. (2014). Neural  
1074 correlates of water reward in thirsty *Drosophila*. *Nat Neurosci*, *17*(11), 1536-  
1075 1542. doi:10.1038/nn.3827
- 1076 Liu, C., Placais, P. Y., Yamagata, N., Pfeiffer, B. D., Aso, Y., Friedrich, A. B., . . . Tanimoto,  
1077 H. (2012). A subset of dopamine neurons signals reward for odour memory  
1078 in *Drosophila*. *Nature*, *488*(7412), 512-516. doi:10.1038/nature11304
- 1079 Long, X., Colonell, J., Wong, A. M., Singer, R. H., & Lionnet, T. (2017). Quantitative  
1080 mRNA imaging throughout the entire *Drosophila* brain. *Nature Methods*,  
1081 *14*(7), 703-706. doi:10.1038/nmeth.4309
- 1082 Love, M. I., Huber, W., & Anders, S. (2014). Moderated estimation of fold change and  
1083 dispersion for RNA-seq data with DESeq2. *Genome Biol*, *15*(12), 550.  
1084 doi:10.1186/s13059-014-0550-8
- 1085 Maher, B. J., & Westbrook, G. L. (2008). Co-transmission of dopamine and GABA in  
1086 periglomerular cells. *J Neurophysiol*, *99*(3), 1559-1564.  
1087 doi:10.1152/jn.00636.2007
- 1088 Mao, Z., & Davis, R. L. (2009). Eight different types of dopaminergic neurons  
1089 innervate the *Drosophila* mushroom body neuropil: anatomical and  
1090 physiological heterogeneity. *Front Neural Circuits*, *3*, 5.  
1091 doi:10.3389/neuro.04.005.2009
- 1092 Mao, Z., Roman, G., Zong, L., & Davis, R. L. (2004). Pharmacogenetic rescue in time  
1093 and space of the rutabaga memory impairment by using Gene-Switch. *Proc*  
1094 *Natl Acad Sci U S A*, *101*(1), 198-203. doi:10.1073/pnas.0306128101
- 1095 Marr, D. (1969). A theory of cerebellar cortex. *J Physiol*, *202*(2), 437-470.
- 1096 Martin, M. (2011). Cutadapt Removes Adapter Sequences From High-Throughput  
1097 Sequencing Reads. *EMBnet.journal*, *Vol.17, No.1*.  
1098 doi:<https://doi.org/10.14806/ej.17.1.200>
- 1099 McGuire, S. E., Deshazer, M., & Davis, R. L. (2005). Thirty years of olfactory learning  
1100 and memory research in *Drosophila melanogaster*. *Prog Neurobiol*, *76*(5),  
1101 328-347. doi:Doi 10.1016/J.Pneurobio.2005.09.003
- 1102 McGuire, S. E., Le, P. T., & Davis, R. L. (2001). The role of *Drosophila* mushroom body  
1103 signaling in olfactory memory. *Science*, *293*(5533), 1330-1333.  
1104 doi:10.1126/science.1062622
- 1105 McGuire, S. E., Le, P. T., Osborn, A. J., Matsumoto, K., & Davis, R. L. (2003).  
1106 Spatiotemporal rescue of memory dysfunction in *Drosophila*. *Science*,  
1107 *302*(5651), 1765-1768. doi:10.1126/science.1089035
- 1108 Medina, J. F., Repa, J. C., Mauk, M. D., & LeDoux, J. E. (2002). Parallels between  
1109 cerebellum and amygdala-dependent conditioning. *Nature Reviews*  
1110 *Neuroscience*, *3*(2), 122-131. doi:Doi 10.1038/Nrn728
- 1111 Meissner, G. W., Nern, A., Singer, R. H., Wong, A. M., Malkesman, O., & Long, X. (2019).  
1112 Mapping Neurotransmitter Identity in the Whole-Mount *Drosophila* Brain  
1113 Using Multiplex High-Throughput Fluorescence in Situ Hybridization.  
1114 *Genetics*, *211*(2), 473-482. doi:10.1534/genetics.118.301749

- 1115 Morton, D. B., Langlais, K. K., Stewart, J. A., & Vermehren, A. (2005). Comparison of  
1116 the properties of the five soluble guanylyl cyclase subunits in *Drosophila*  
1117 *melanogaster*. *J Insect Sci*, 5, 12.
- 1118 Ni, J. Q., Zhou, R., Czech, B., Liu, L. P., Holderbaum, L., Yang-Zhou, D., . . . Perrimon, N.  
1119 (2011). A genome-scale shRNA resource for transgenic RNAi in *Drosophila*.  
1120 *Nature Methods*, 8(5), 405-407. doi:10.1038/nmeth.1592
- 1121 Niens, J., Reh, F., Coban, B., Cichewicz, K., Eckardt, J., Liu, Y. T., . . . Riemensperger, T.  
1122 D. (2017). Dopamine Modulates Serotonin Innervation in the *Drosophila*  
1123 Brain. *Front Syst Neurosci*, 11, 76. doi:10.3389/fnsys.2017.00076
- 1124 Niewalda, T., Michels, B., Jungnickel, R., Diegelmann, S., Kleber, J., Kahne, T., &  
1125 Gerber, B. (2015). Synapsin Determines Memory Strength after Punishment-  
1126 and Relief-Learning. *Journal of Neuroscience*, 35(19), 7487-7502.  
1127 doi:10.1523/Jneurosci.4454-14.2015
- 1128 Nusbaum, M. P., Blitz, D. M., & Marder, E. (2017). Functional consequences of  
1129 neuropeptide and small-molecule co-transmission. *Nat Rev Neurosci*, 18(7),  
1130 389-403. doi:10.1038/nrn.2017.56
- 1131 Okada, R., Rybak, J., Manz, G., & Menzel, R. (2007). Learning-related plasticity in PE1  
1132 and other mushroom body-extrinsic neurons in the honeybee brain. *J*  
1133 *Neurosci*, 27(43), 11736-11747. doi:10.1523/JNEUROSCI.2216-07.2007
- 1134 Oswald, D., Felsenberg, J., Talbot, C. B., Das, G., Perisse, E., Huetteroth, W., & Waddell,  
1135 S. (2015). Activity of defined mushroom body output neurons underlies  
1136 learned olfactory behavior in *Drosophila*. *Neuron*, 86(2), 417-427.  
1137 doi:10.1016/j.neuron.2015.03.025
- 1138 Pai, T. P., Chen, C. C., Lin, H. H., Chin, A. L., Lai, J. S., Lee, P. T., . . . Chiang, A. S. (2013).  
1139 *Drosophila* ORB protein in two mushroom body output neurons is necessary  
1140 for long-term memory formation. *Proc Natl Acad Sci U S A*, 110(19), 7898-  
1141 7903. doi:10.1073/pnas.1216336110
- 1142 Patriarchi, T., Cho, J. R., Merten, K., Howe, M. W., Marley, A., Xiong, W. H., . . . Tian, L.  
1143 (2018). Ultrafast neuronal imaging of dopamine dynamics with designed  
1144 genetically encoded sensors. *Science*, 360(6396).  
1145 doi:10.1126/science.aat4422
- 1146 Pavot, P., Carbognin, E., & Martin, J. R. (2015). PKA and cAMP/CNG Channels  
1147 Independently Regulate the Cholinergic Ca(2+)-Response of *Drosophila*  
1148 Mushroom Body Neurons(1,2,3). *eNeuro*, 2(2). doi:10.1523/ENEURO.0054-  
1149 14.2015
- 1150 Pettersson, J. (1970). *Insect Systematics & Evolution*, 1 (1), 63 – 73.  
1151 doi:10.1163/187631270X00357
- 1152 Placais, P. Y., Trannoy, S., Friedrich, A. B., Tanimoto, H., & Preat, T. (2013). Two pairs  
1153 of mushroom body efferent neurons are required for appetitive long-term  
1154 memory retrieval in *Drosophila*. *Cell Rep*, 5(3), 769-780.  
1155 doi:10.1016/j.celrep.2013.09.032
- 1156 Poulin, J. F., Zou, J., Drouin-Ouellet, J., Kim, K. Y., Cicchetti, F., & Awatramani, R. B.  
1157 (2014). Defining midbrain dopaminergic neuron diversity by single-cell gene  
1158 expression profiling. *Cell Rep*, 9(3), 930-943.  
1159 doi:10.1016/j.celrep.2014.10.008

- 1160 Qin, H., Cressy, M., Li, W., Coravos, J. S., Izzi, S. A., & Dubnau, J. (2012). Gamma  
1161 neurons mediate dopaminergic input during aversive olfactory memory  
1162 formation in *Drosophila*. *Curr Biol*, *22*(7), 608-614.  
1163 doi:10.1016/j.cub.2012.02.014
- 1164 Quinn, W. G., Harris, W. A., & Benzer, S. (1974). Conditioned behavior in *Drosophila*  
1165 melanogaster. *Proc Natl Acad Sci U S A*, *71*(3), 708-712.
- 1166 Rabinovich, D., Yaniv, S. P., Alyagor, I., & Schuldiner, O. (2016). Nitric Oxide as a  
1167 Switching Mechanism between Axon Degeneration and Regrowth during  
1168 Developmental Remodeling. *Cell*, *164*(1-2), 170-182.  
1169 doi:10.1016/j.cell.2015.11.047
- 1170 Regulski, M., & Tully, T. (1995). Molecular and biochemical characterization of  
1171 dNOS: a *Drosophila* Ca<sup>2+</sup>/calmodulin-dependent nitric oxide synthase. *Proc*  
1172 *Natl Acad Sci U S A*, *92*(20), 9072-9076.
- 1173 Riemensperger, T., Isabel, G., Coulom, H., Neuser, K., Seugnet, L., Kume, K., . . .  
1174 Birman, S. (2011). Behavioral consequences of dopamine deficiency in the  
1175 *Drosophila* central nervous system. *Proc Natl Acad Sci U S A*, *108*(2), 834-839.  
1176 doi:10.1073/pnas.1010930108
- 1177 Riemensperger, T., Voller, T., Stock, P., Buchner, E., & Fiala, A. (2005). Punishment  
1178 prediction by dopaminergic neurons in *Drosophila*. *Curr Biol*, *15*(21), 1953-  
1179 1960. doi:10.1016/j.cub.2005.09.042
- 1180 Schindelin, J., Arganda-Carreras, I., Frise, E., Kaynig, V., Longair, M., Pietzsch, T., . . .  
1181 Cardona, A. (2012). Fiji: an open-source platform for biological-image  
1182 analysis. *Nature Methods*, *9*(7), 676-682. doi:10.1038/nmeth.2019
- 1183 Schroll, C., Riemensperger, T., Bucher, D., Ehmer, J., Voller, T., Erbguth, K., . . . Fiala, A.  
1184 (2006). Light-induced activation of distinct modulatory neurons triggers  
1185 appetitive or aversive learning in *Drosophila* larvae. *Curr Biol*, *16*(17), 1741-  
1186 1747. doi:10.1016/j.cub.2006.07.023
- 1187 Schwaerzel, M., Monastirioti, M., Scholz, H., Friggi-Grelin, F., Birman, S., &  
1188 Heisenberg, M. (2003). Dopamine and octopamine differentiate between  
1189 aversive and appetitive olfactory memories in *Drosophila*. *Journal of*  
1190 *Neuroscience*, *23*(33), 10495-10502.
- 1191 Sejourne, J., Placais, P. Y., Aso, Y., Siwanowicz, I., Trannoy, S., Thoma, V., . . . Preat, T.  
1192 (2011). Mushroom body efferent neurons responsible for aversive olfactory  
1193 memory retrieval in *Drosophila*. *Nat Neurosci*, *14*(7), 903-910.  
1194 doi:10.1038/nn.2846
- 1195 Shah, S., & Hyde, D. R. (1995). Two *Drosophila* genes that encode the alpha and beta  
1196 subunits of the brain soluble guanylyl cyclase. *J Biol Chem*, *270*(25), 15368-  
1197 15376.
- 1198 Shibuki, K., & Okada, D. (1991). Endogenous nitric oxide release required for long-  
1199 term synaptic depression in the cerebellum. *Nature*, *349*(6307), 326-328.  
1200 doi:10.1038/349326a0
- 1201 Shuai, Y., Lu, B., Hu, Y., Wang, L., Sun, K., & Zhong, Y. (2010). Forgetting is regulated  
1202 through Rac activity in *Drosophila*. *Cell*, *140*(4), 579-589.  
1203 doi:10.1016/j.cell.2009.12.044

- 1204 Skoulakis, E. M., Kalderon, D., & Davis, R. L. (1993). Preferential expression in  
1205 mushroom bodies of the catalytic subunit of protein kinase A and its role in  
1206 learning and memory. *Neuron*, *11*(2), 197-208.
- 1207 Stasiv, Y., Regulski, M., Kuzin, B., Tully, T., & Enikolopov, G. (2001). The *Drosophila*  
1208 nitric-oxide synthase gene (dNOS) encodes a family of proteins that can  
1209 modulate NOS activity by acting as dominant negative regulators. *J Biol Chem*,  
1210 *276*(45), 42241-42251. doi:10.1074/jbc.M105066200
- 1211 Stuber, G. D., Hnasko, T. S., Britt, J. P., Edwards, R. H., & Bonci, A. (2010).  
1212 Dopaminergic terminals in the nucleus accumbens but not the dorsal  
1213 striatum corelease glutamate. *J Neurosci*, *30*(24), 8229-8233.  
1214 doi:10.1523/JNEUROSCI.1754-10.2010
- 1215 Sulzer, D., Joyce, M. P., Lin, L., Geldwert, D., Haber, S. N., Hattori, T., & Rayport, S.  
1216 (1998). Dopamine neurons make glutamatergic synapses in vitro. *J Neurosci*,  
1217 *18*(12), 4588-4602.
- 1218 Sun, F., Zeng, J., Jing, M., Zhou, J., Feng, J., Owen, S. F., . . . Li, Y. (2018). A Genetically  
1219 Encoded Fluorescent Sensor Enables Rapid and Specific Detection of  
1220 Dopamine in Flies, Fish, and Mice. *Cell*, *174*(2), 481-496 e419.  
1221 doi:10.1016/j.cell.2018.06.042
- 1222 Takemura, S. Y., Aso, Y., Hige, T., Wong, A., Lu, Z., Xu, C. S., . . . Scheffer, L. K. (2017). A  
1223 connectome of a learning and memory center in the adult *Drosophila* brain.  
1224 *Elife*, *6*. doi:10.7554/eLife.26975
- 1225 Tanaka, N. K., Tanimoto, H., & Ito, K. (2008). Neuronal assemblies of the *Drosophila*  
1226 mushroom body. *J Comp Neurol*, *508*(5), 711-755. doi:10.1002/cne.21692
- 1227 Tang, S., & Yasuda, R. (2017). Imaging ERK and PKA Activation in Single Dendritic  
1228 Spines during Structural Plasticity. *Neuron*, *93*(6), 1315-1324 e1313.  
1229 doi:10.1016/j.neuron.2017.02.032
- 1230 Tecuapetla, F., Patel, J. C., Xenias, H., English, D., Tadros, I., Shah, F., . . . Koos, T.  
1231 (2010). Glutamatergic signaling by mesolimbic dopamine neurons in the  
1232 nucleus accumbens. *J Neurosci*, *30*(20), 7105-7110.  
1233 doi:10.1523/JNEUROSCI.0265-10.2010
- 1234 Tempel, B. L., Bonini, N., Dawson, D. R., & Quinn, W. G. (1983). Reward learning in  
1235 normal and mutant *Drosophila*. *Proc Natl Acad Sci U S A*, *80*(5), 1482-1486.
- 1236 Thurmond, J., Goodman, J. L., Strelets, V. B., Attrill, H., Gramates, L. S., Marygold, S. J., .  
1237 . . . FlyBase, C. (2019). FlyBase 2.0: the next generation. *Nucleic Acids Res*,  
1238 *47*(D1), D759-D765. doi:10.1093/nar/gky1003
- 1239 Tomchik, S. M. (2013). Dopaminergic neurons encode a distributed, asymmetric  
1240 representation of temperature in *Drosophila*. *J Neurosci*, *33*(5), 2166-2176a.  
1241 doi:10.1523/JNEUROSCI.3933-12.2013
- 1242 Tomchik, S. M., & Davis, R. L. (2009). Dynamics of learning-related cAMP signaling  
1243 and stimulus integration in the *Drosophila* olfactory pathway. *Neuron*, *64*(4),  
1244 510-521. doi:10.1016/j.neuron.2009.09.029
- 1245 Trannoy, S., Redt-Clouet, C., Dura, J. M., & Preat, T. (2011). Parallel processing of  
1246 appetitive short- and long-term memories in *Drosophila*. *Curr Biol*, *21*(19),  
1247 1647-1653. doi:10.1016/j.cub.2011.08.032



- 1248 Tritsch, N. X., Ding, J. B., & Sabatini, B. L. (2012). Dopaminergic neurons inhibit  
1249 striatal output through non-canonical release of GABA. *Nature*, *490*(7419),  
1250 262-266. doi:10.1038/nature11466
- 1251 Tully, T., & Quinn, W. G. (1985). Classical-Conditioning and Retention in Normal and  
1252 Mutant *Drosophila-Melanogaster*. *Journal of Comparative Physiology a-*  
1253 *Sensory Neural and Behavioral Physiology*, *157*(2), 263-277. doi:Doi  
1254 10.1007/Bf01350033
- 1255 Vanover, K. E., Davis, R. E., Zhou, Y., Ye, W., Brasic, J. R., Gapsin, L., . . . Wong, D. F.  
1256 (2018). Dopamine D2 receptor occupancy of lumateperone (ITI-007): a  
1257 Positron Emission Tomography Study in patients with schizophrenia.  
1258 *Neuropsychopharmacology*. doi:10.1038/s41386-018-0251-1
- 1259 Venken, K. J., Schulze, K. L., Haelterman, N. A., Pan, H., He, Y., Evans-Holm, M., . . .  
1260 Bellen, H. J. (2011). MiMIC: a highly versatile transposon insertion resource  
1261 for engineering *Drosophila melanogaster* genes. *Nature Methods*, *8*(9), 737-  
1262 743.
- 1263 Vet, L. E. M., Vanlenteren, J. C., Heymans, M., & Meelis, E. (1983). An Air-Flow  
1264 Olfactometer for Measuring Olfactory Responses of Hymenopterous  
1265 Parasitoids and Other Small Insects. *Physiological Entomology*, *8*(1), 97-106.  
1266 doi:Doi 10.1111/J.1365-3032.1983.Tb00338.X
- 1267 Walkinshaw, E., Gai, Y., Farkas, C., Richter, D., Nicholas, E., Keleman, K., & Davis, R. L.  
1268 (2015). Identification of genes that promote or inhibit olfactory memory  
1269 formation in *Drosophila*. *Genetics*, *199*(4), 1173-1182.  
1270 doi:10.1534/genetics.114.173575
- 1271 White, N. M., & McDonald, R. J. (2002). Multiple parallel memory systems in the  
1272 brain of the rat. *Neurobiol Learn Mem*, *77*(2), 125-184.  
1273 doi:10.1006/nlme.2001.4008
- 1274 Wu, J. K., Tai, C. Y., Feng, K. L., Chen, S. L., Chen, C. C., & Chiang, A. S. (2017). Long-  
1275 term memory requires sequential protein synthesis in three subsets of  
1276 mushroom body output neurons in *Drosophila*. *Sci Rep*, *7*(1), 7112.  
1277 doi:10.1038/s41598-017-07600-2
- 1278 Yakubovich, N., Silva, E. A., & O'Farrell, P. H. (2010). Nitric oxide synthase is not  
1279 essential for *Drosophila* development. *Curr Biol*, *20*(4), R141-142.  
1280 doi:10.1016/j.cub.2009.12.011
- 1281 Yamagata, N., Ichinose, T., Aso, Y., Placais, P. Y., Friedrich, A. B., Sima, R. J., . . .  
1282 Tanimoto, H. (2015). Distinct dopamine neurons mediate reward signals for  
1283 short- and long-term memories. *Proc Natl Acad Sci U S A*, *112*(2), 578-583.  
1284 doi:10.1073/pnas.1421930112
- 1285 Zars, T., Fischer, M., Schulz, R., & Heisenberg, M. (2000). Localization of a short-term  
1286 memory in *Drosophila*. *Science*, *288*(5466), 672-675.

1287

1288

1289 **Figures legends**

1290 **Figure 1. Dopaminergic neurons can induce memories without dopamine, but with**

1291 **opposite valence**

1292 (A) Conceptual diagram of the circuit organization in the MB lobes. Sparse activity in the  
1293 parallel axonal fibers of the KCs represent odor stimuli. DAN inputs induce plasticity at KC  
1294 to MBON synapses (represented by circles), when DAN and KC activity are coincident (red  
1295 circles). The MB compartments (indicated by the colored rectangles) differ in their learning  
1296 and memory decay rates. The actual MB contains 15 compartments (Tanaka et al., 2008).

1297 (B) Top: Design of the optogenetic olfactory arena and a diagram illustrating odor paths in  
1298 the arena. (C) Schematic representation of the innervation patterns of the PPL1 (blue;  
1299 *R52H03-p65ADZp*; *TH-ZpGAL4DBD*) and PAM cluster (orange; *R58E02-p65ADZp*; *DDC-*  
1300 *ZpGAL4DBD*) dopaminergic neurons used to train flies. A diagram of the training protocol  
1301 is also shown. Flies were trained and tested in the olfactory area. A 1-min odor exposure  
1302 was paired with thirty 1-s pulses of red light (627 nm peak and 34.9  $\mu\text{W}/\text{mm}^2$ ), followed by  
1303 1-min without odor or red light, and then presentation of a second odor for 1-min without  
1304 red light. In one group of flies, odors A and B were 3-octanol and 4-methylcyclohexanol,  
1305 respectively, while in a second group of flies, the odors were reversed. Memory was tested  
1306 immediately after three repetition of training bouts by giving flies a binary choice between  
1307 the two odors in the olfactory area.

1308 (D-G) Odor memories induced by the collective optogenetic activation of PPL1- $\gamma$ 1pedc,  
1309 PPL1- $\gamma$ 2 $\alpha$ '1, PPL1- $\alpha$ '2 $\alpha$ 2 and PPL1- $\alpha$ 3 DANs (upper panels; blue lines) or activation of  
1310 PAM cluster DANs (lower panels; orange lines) in wild type (D), TH mutant (E), TH  
1311 mutant with feeding of 1mg/ml L-DOPA and 0.1mg/ml carbidopa (F), or TH mutant with

1312 cell-type specific expression of a wild-type TH cDNA (G; see the methods for drug  
1313 treatment and supplemental information for genotypes). Time courses of the performance  
1314 index (PI) during the test period are shown as the average of reciprocal experiments.  
1315 The PI is defined as [(number of flies in the odor A quadrants) - (number of flies in  
1316 odor B quadrants)]/(total number of flies). Thick line and shading represent mean  $\pm$   
1317 SEM. N= 12-16. Two split-GAL4 drivers R52H03-p65ADZp in attP40; TH-ZpGAL4DBD  
1318 in VK00027 and R58E02-p65ADZp in attP40; DDC-ZpGAL4DBD in VK00027 were used  
1319 for driving 20xUAS-CsChrimon-mVenus in PPL1 or PAM DANs, respectively.

1320 **Figure 1-figure supplement 1 Cell type specific rescue of TH**

1321 TH immunoreactivity (from left to right): PAM DANs in wild type; PAM DANs in TH  
1322 mutant; PAM DANs in TH mutant with cell-type specific rescue of TH using UAS-TH;  
1323 PPL1 DANs in TH mutant; and or PPL1 DANs in TH mutant with cell-type specific rescue  
1324 of TH using UAS-TH. In the TH mutant background, TH immunoreactivity in the brain was  
1325 completely abolished, except for a few cells dorsal medial surface of the brain and near the  
1326 ventral lateral protocerebrum (arrow heads). With UAS-TH, TH immunoreactivity was  
1327 restored in PAM or PPL1 DANs (arrows). The expression pattern, visualized using UAS-  
1328 CsChrimson-mVenus, of the PAM and PPL1 drivers used is shown in lower panels.

1329

1330 **Figure 2. Cotransmitter effects differ among DAN cell types**

1331 The PI of olfactory memories measured immediately after 3x 1-min training in TH  
1332 mutant/TH+ heterozygotes (+) or TH mutant/TH mutant (-) background. Odor  
1333 presentation was paired with either activation of bitter taste neurons (Gr66a-GAL4) or

1334 the indicated subset of DANs in which optogenetic activation was used as diagramed in  
1335 Figure 1C. A split-GAL4 driver without enhancer (empty) was used as a control. The  
1336 bottom and top of each box represents the first and third quartile, and the horizontal  
1337 line dividing the box is the median; the PI was calculated by averaging the PIs from the  
1338 final 30 s of each test period (see legend to Figure 1). The whiskers represent the  
1339 minimum and maximum. N= 8-16. Asterisk indicates significance from the empty-  
1340 GAL4 control. Comparison with chance level (i.e. PI=0) resulted in identical statistical  
1341 significance: \*,  $p < 0.05$ ; \*\*,  $p < 0.01$ ; \*\*\*,  $p < 0.001$ ; n.s., not significant. See Figure S2  
1342 and [www.janelia.org/split-gal4](http://www.janelia.org/split-gal4) for expression patterns of split-GAL4 drivers.

#### 1343 **Figure 2-figure supplement 1 Expression patterns of driver lines**

1344 Expression patterns of CsChrimson-mVenus driven by denoted split-GAL4 drivers made in  
1345 this study. All other lines used were reported previously. See supplemental table 1 for the  
1346 list of driver lines and Aso et al. 20114a and [www.janelia.org/split-gal4](http://www.janelia.org/split-gal4) for primary image  
1347 data of other split-GAL4 lines.

1348

#### 1349 **Figure 3 Identification of NOS1 in PPL1- $\gamma$ 1pedc and PAM- $\gamma$ 5 by RNA-Seq**

1350 (A) The RNA-Seq data of two cell types that showed the valence-inversion phenotype  
1351 (i.e. PPL1- $\gamma$ 1pedc and PAM-  $\gamma$ 5) were pooled and compared against the pooled data of all  
1352 other cell types examined (DANs, MBONs, KCs). The  $-\log_{10}$  of p-values for comparing  
1353 number of counted transcripts between the pooled data of PPL1- $\gamma$ 1pedc and PAM-  $\gamma$ 5  
1354 relative to that of all other cell types were plotted against the  $\log_2$  of fold changes

1355 observed in the expression levels of transcripts. Different splice isoforms of genes are  
1356 plotted separately (dots). Green dots represent the 2,981 transcripts expressed at levels  
1357 above 10 transcripts per million (TPM) in both PPL1- $\gamma$ 1pedc and PAM- $\gamma$ 5. Gray dots  
1358 represent the 31,539 transcripts with expression levels below 10 TPM in one or both of  
1359 these two DANs. Dots on +20 or -20 x-axis represent splice isoforms that were detected  
1360 only in the PPL1- $\gamma$ 1pedc and PAM-  $\gamma$ 5 or other cell types. Magenta dots show the three  
1361 splice isoforms of NOS.

1362 (B) Mean TPM of NOS splicing isoforms. The magenta dashed line highlights PPL1-  
1363  $\gamma$ 1pedc and PAM-  $\gamma$ 5, the two cell types that showed the valence-inversion phenotype.

1364 (C) Map of the NOS locus. Exons and protein coding sequences are depicted as boxes and  
1365 gray boxes, respectively. Only the full length isoform NOS-RA (dNOS1) produces a  
1366 functional NOS protein (Stasiv et al., 2001). The antibody we used was raised against  
1367 exon16 (Kuntz et al., 2017; Yakubovich et al., 2010). Arrows indicate the first four exons  
1368 of NOS1 and NOS4 where 40 FISH probes were designed to recognize these, but not  
1369 NOS-RK transcripts. See Methods for details of the position and sequence of the probes.

1370 (D) NOS immunoreactivity was observed in the  $\gamma$ 1pedc compartment of the MB.  
1371 Immunoreactivity was markedly reduced by expressing NOS-RNAi in PPL1- $\gamma$ 1pedc.

1372 (E) Distribution of NOS-immunoreactivity inside the MB is displayed. Voxels above  
1373 mean +2SD of the entire brain are shown in 12 bit scale in magenta. Insert shows a  
1374 quantification of NOS-immunoreactivity in each MB compartment. Signal in  $\gamma$ 1 was  
1375 significantly higher than 12 compartments indicated by the bracket (Kruskal-Wallis

1376 with Dann's test for selected pairs). Signal in  $\gamma 1$  was significantly higher than 8  
1377 compartments indicated by the bracket; \*,  $p < 0.05$ ; \*\*,  $p < 0.01$ ;  $n=12$   
1378

1379 **Figure 3-figure supplement 1 Controls for RNA-Seq reproducibility, anti-NOS**  
1380 **antibody specificity and FISH probes.**

1381 (A) Relationship between cDNA yields, number of sorted cells, mapped reads, number  
1382 of detected genes with more than one mapped read. Data for each biological replicate  
1383 are shown. Original data are presented in Supplementary File 1.

1384 (B) Quantification of NOS immunoreactivity (a.u.; arbitrary units) in the  $\gamma 1$  or  $\alpha 2$   
1385 compartment with or without NOS-RNAi. The whiskers represent the minimum and  
1386 maximum.  $N= 12$ . Asterisk indicates significance from 0: \*,  $p < 0.05$ ; n.s., not significant.  
1387 Horizontal dotted line indicates mean NOS signals in the brain.

1388 (C) Outside of the MB, only a couple of additional DANs that are labeled by the NOS  
1389 FISH probes. Colabelling by FISH probes against TH (green) and first 4 exons of NOS1  
1390 transcripts (magenta) is shown. Diagram and projection of anterior or posterior brains  
1391 are shown. Circles in diagram represent soma of DANs detected by TH probes; the  
1392 different clusters of dopaminergic cell bodies (PAM, PAL, T1, PPM1, PPM2, PPM3,  
1393 PPL1, PPL2c, PPL2ab and VUM) are labeled. Circles filled with magenta represent  
1394 DANs overlapping with NOS (arrows). In addition to one cell in PPL1 (presumably  
1395 PPL1-  $\gamma 1$ pedc) and about a dozen of PAM cluster cells, we observed that one cell in the  
1396 PPL2ab cluster and a small TH-positive cell outside, but near, the PPL2ab cluster  
1397 (arrows) were labeled with NOS-FISH probes.

1398 (D) NOS-FISH signal was observed in soma of PPL1- $\gamma 1$ pedc but not in PPL1- $\alpha' 2\alpha 2$ .

1399

1400 **Figure 3-figure supplement 2 RNA-seq data for genes related to**

1401 **neurotransmitters**

1402 Mean TPM values for each gene isoform are listed with the corresponding gene ID. See

1403 Supplementary File 1 for the full data set.

1404

1405 **Figure 4 NOS in dopaminergic neurons contributes to memory formation.**

1406 (A) Increasing the dose of L-NNA reduced the positive-valence memory induced by

1407 activation of PPL1- $\gamma$ 1pedc in a TH mutant background. The ability to form an negative-

1408 valence memory was restored by feeding of L-DOPA plus cardidopa and this memory

1409 formation was not affected by L-NNA. N=8-12.

1410 (B) Feeding of L-NNA in a TH mutant background reduced the negative-valence

1411 memory induced by activation of the combination of PAM-  $\gamma$ 5 and PAM- $\beta$ '2a, but not of

1412 PPL1-  $\gamma$ 2 $\alpha$ '1. N= 12-16

1413 (C) Activation of PPL1 DANs (PPL1- $\gamma$ 1pedc, PPL1- $\gamma$ 2 $\alpha$ '1, PPL1- $\alpha$ '2 $\alpha$ 2 and PPL1- $\alpha$ 3)

1414 induced significant positive-valence memory in TH mutant background. The valence of

1415 the induced memory was negative when NOS-RNAi was expressed in the same DANs.

1416 We postulate that the negative-valence memory observed when NOS-RNAi is expressed

1417 results from an as yet unidentified cotransmitter released by PPL1- $\gamma$ 2 $\alpha$ '1 (see also panel B

1418 and Figure 2). N= 8

1419 (D) NOS immunoreactivity in the  $\alpha$ 3 compartment in wild type (left) and after ectopic

1420 expression of NOS (right).

1421 (E) Activation of PPL1- $\alpha$ 3 with ectopic expression of NOS induced significant positive-

1422 valence memory after 3x 1-min training protocol in TH mutant background (Figure 1C).

1423 Note that activation of PPL1- $\alpha$ 3 can induce negative-valence memory in wild-type

1424 background, but only after 10x spaced training (Aso & Rubin, 2016). N= 12

1425 In A-C and E, memories assessed immediately after 3x 1-min training are shown. The

1426 bottom and top of each box represents the first and third quartile, and the horizontal

1427 line dividing the box is the median. The whiskers represent the minimum and

1428 maximum. N= 8-16. Asterisk indicates significance of designated pair in A and B, or

1429 from 0 in C and D: \*,  $p < 0.05$ ; \*\*\*,  $p < 0.001$ ; n.s., not significant.

1430

1431 **Figure 5 Soluble guanylate cyclase in the Kenyon cells is required to form NO-**

1432 **dependent memory**

1433 (A) Diagram of soluble or receptor guanylyl cyclases in *Drosophila*.

1434 (B) RNA-seq data indicate coexpression of Gyc $\alpha$ 99B and Gyc $\beta$ 100B in KCs, MBONs and

1435 DANs. For comparison, other guanylate cyclase are also shown. Note that RNA-Seq

1436 detected transcripts of neuropeptide gene *Nplp1* in both PPL1- $\gamma$ 1pedc and PAM- $\gamma$ 5 (Figure

1437 S4), but expression of its receptor Gyc76C was barely detectable compared to

1438 Gyc $\alpha$ 99B and Gyc $\beta$ 100B.

1439 (C) Induction of Gyc $\beta$ 100B-shRNA in Kenyon cells by activating MB247-switch driver

1440 (Mao, Roman, Zong, & Davis, 2004) with RU-486 feeding reduced the positive-valence



1441 memory induced by PPL1- $\gamma$ 1pedc. We also observed a partial effect in the flies without  
1442 RU-486, presumably due to leaky expression. Negative-valence memory with  
1443 additional feeding of L-DOPA and cardidopa was not affected by Gyc $\beta$ 100B-shRNA  
1444 induction in KCs. Memories immediately after 3x 1-min training are shown. The  
1445 bottom and top of each box represents the first and third quartile, and the horizontal  
1446 line dividing the box is the median. The whiskers represent the minimum and  
1447 maximum. N= 12-16. Asterisk indicates significance of designated pair: \*, p < 0.05; \*\*,p  
1448 < 0.01; n.s., not significant.

1449

#### 1450 **Figure 5-figure supplement 1**

##### 1451 **Expression of Gycbeta100B in the mushroom body lobes**

1452 Distribution of Gycbeta100B-EGFP in flies carrying the Gycbeta100B[MI08892-  
1453 GFSTF.2] in the mushroom body lobes is shown with anterior to posterior confocal  
1454 sections. Right panels show images of wild-type fly, which did not contain the  
1455 Gycbeta100B-EGFP insertion, prepared with the identical immunolabelling procedure.  
1456

##### 1457 **Figure 6 NO-dependent effect develops slowly, requires longer training than** 1458 **dopamine-dependent memory, and shortens memory retention**

1459 (A) Schematic diagram of training protocols.

1460 (B) Learning rate by activation of PPL1- $\gamma$ 1pedc in wild type (left; blue), wild type with L-  
1461 NNA feeding (center; purple) or TH mutant background (right; blue). Memory scores were  
1462 not significantly affected by L-NNA feeding in any of the training protocols in wild type

1463 flies. A single 10-s training was insufficient to induce any detectable memory in TH mutant  
1464 background, but induced significant negative-valence memory in wildtype background.

1465 (C) Time course of NO-dependent, positive-valence memory induced by PPL1- $\gamma$ 1pedc in a  
1466 TH mutant background after 1x 1-min training. Data point and error bars indicate mean and  
1467 SEM. N=8-10. Note that the plot is split in the time axis to better display the kinetics.

1468 (D) After 1x 1-min training, a cell type specific knock down of NOS in PPL1- $\gamma$ 1pedc  
1469 prolonged the retention of negative-valence memory induced by PPL1- $\gamma$ 1pedc in wild-type  
1470 background measured at 3 and 6 hours. Note that expression of NOS-RNAi did not affect  
1471 the score of immediate memory. N= 12.

1472 (E) Effect of repetitive trainings on 1-day memory. Repetitive training with activation of  
1473 PPL1- $\gamma$ 1pedc did not induced significant 1-day memory in wild-type background  
1474 irrespective of training protocols (blue; left). Flies expressing NOS-shRNA showed  
1475 significant 1-day memory after 10x spaced training (purple; center). In a TH mutant  
1476 background (right), appetitive memory was induced by 3X and 10X repetitive training. For  
1477 activation of PPL1- $\gamma$ 1pedc, VT045661-LexA was used as the driver for experiments in B,  
1478 C and TH mutant background data in E, and MB320C split-GAL4 for wild-type and NOS-  
1479 RNAi data in D. We made consistent observations with both global L-NNA inhibition of  
1480 NOS and cell-type-specific NOS-RNAi (see Figure S6). The bottom and top of each box  
1481 represents the first and third quartile, and the horizontal line dividing the box is the  
1482 median. The whiskers represent the minimum and maximum. N= 12-16. Asterisk  
1483 indicates significance between control and NOS-RNAi in D, between designated pair in  
1484 E, or from 0 in all others: \*, p < 0.05; \*\*, p < 0.01; \*\*\*, p < 0.001; n.s., not significant.

1485 **Figure 6-figure supplement 1**

1486 **(A)** L-NNA feeding prolonged retention of memory induced by 1x 1-min training with  
1487 PPL1- $\gamma$ 1pedc activation at 3 and 6 hour time points. VT045661-LexA was used as a  
1488 driver to express CsChrimson-mVenus. Data point and error bars indicate mean and  
1489 SEM. \*,  $p < 0.05$ ; \*\*,  $p < 0.01$

1490 **(B)** Knockdown of NOS in PPL1- $\gamma$ 1pedc prolonged memory retention after 1x 1-min  
1491 training with 60V electric shock. N=12.

1492 **(C)** Inhibition of NOS by L-NNA prolonged the retention of memory that was induced by  
1493 10x spaced training with activation of PPL1- $\gamma$ 1pedc using the VT045661-LexA driver.  
1494 N=12. The bottom and top of each box represents the first and third quartile, and the  
1495 horizontal line dividing the box is the median. The whiskers represent the minimum and  
1496 maximum. \*,  $p < 0.05$

1497 **Figure 7 Nitric oxide enhances fast update of memory**

1498 **(A)** Experimental design to measure dynamics of memory when flies encounter new  
1499 experiences after establishing an initial odor memory that was induced by the 3x 1-min  
1500 spaced training that paired odor presentation with optogenetic PPL1- $\gamma$ 1ped activation .

1501 **(B)** In reversal learning, the control odor in the first three trainings was now paired with  
1502 activation of PPL1- $\gamma$ 1ped. In all three cases, the first reversal learning was sufficient to  
1503 modify the odor preference. However, only in wild-type flies was this change large  
1504 enough that the flies preferred the new odor. In L-NNA fed or TH mutant (dopamine

1505 deficient) flies changing the odor preference required multiple training sessions with the  
1506 new odor.

1507 (C) Three exposures to each of the two odors did not significantly change the odor  
1508 preference in any of the three sets of flies.

1509 (D) One activation of PPL1- $\gamma$ 1ped without odor quickly reduced conditioned response in  
1510 wild type. L-NNA fed flies or dopamine deficient flies required three or five times,  
1511 respectively, more repetitions of PPL1- $\gamma$ 1ped activation to significantly reduce the  
1512 conditioned response.

1513 (E) Changes in PI induced by 3x training (as measured in Test 2) resulting from the first  
1514 reversal training (left) or from DAN activation without odor presentation (right) (as  
1515 measured in Test3). The observed changes were significantly larger in wild-type flies  
1516 compared to L-NNA fed flies.

### 1517 **Figure 8 Modeling dopamine and NO mediated plasticity**

1518 (A) Summary of plasticity model for independent DA and NO pathways. Synaptic weight  
1519  $w_i$  from  $KC_i$  to an MBON is increased or decreased depending on the pairing protocol.  $A$  and  
1520  $B$  determine the magnitude of the depression or potentiation induced by pairing, and  $\tau$   
1521 determines the timescale over which weight changes occur.

1522 (B) Illustration of the effects of the model in (A), for only DA (left) or only NO (right)  
1523 dependent plasticity. In each plot, KC and DANs are first co-activated, followed by a later  
1524 DA activation without KC activation.

1525 (C) Model performance index (PI) for different pairing protocols. In (C)-(F), crosses  
1526 represent the means of data from Figure 7.

1527 (D) Modeling effects of combined DA and NO dependent plasticity. Gray curve: synaptic  
1528 weights  $w(t)$  are modeled as an additive function of DA and NO dependent effects  $D(t)$  and  
1529  $N(t)$ ,  $w(t) \propto N(t) + D(t)$ . Blue curve: a multiplicative interaction with  $w(t) \propto (1 + N(t))(1 -$   
1530  $D(t))$ .

1531 (E) Modeling 24-hour memory decay following 1x1-min odor pairing. We assume a low  
1532 level of spontaneous DAN activity and choose  $B_{DA}$  and  $B_{NO}$  to fit the data. Blue curve:  
1533 control. Purple curve: only DA dependent plasticity (compared to data from NOS-RNAi  
1534 experiment).

1535 (F) Modeling effects of DAN activation and reversal learning.  $B_{DA}$  and  $B_{NO}$  are chosen to fit  
1536 the effects of DAN activation (top). The model qualitatively reproduces the effects of  
1537 reversal learning (bottom) with no free parameters.

1538

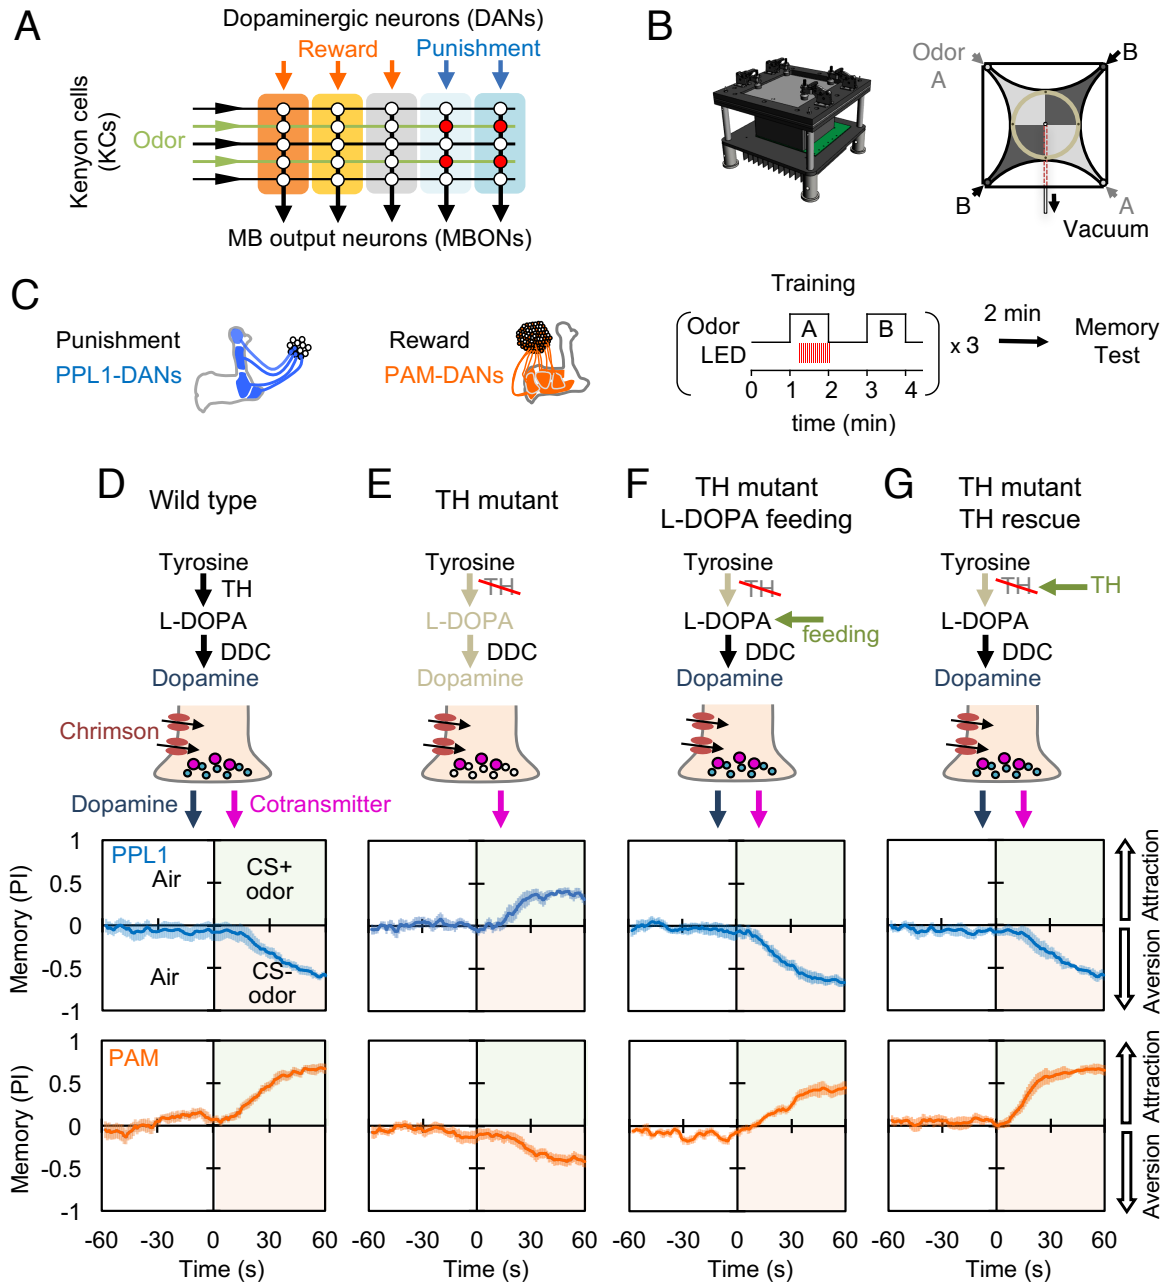

**Figure 1**



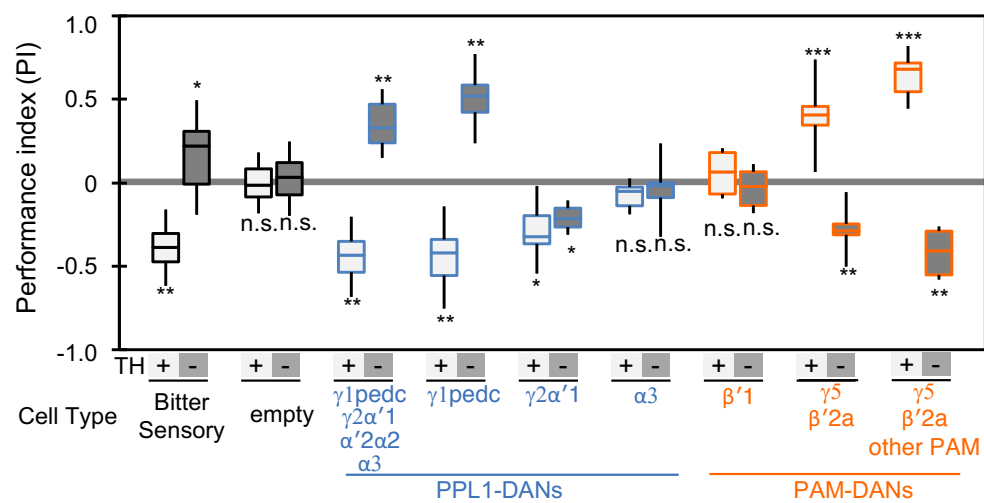

**Figure 2**



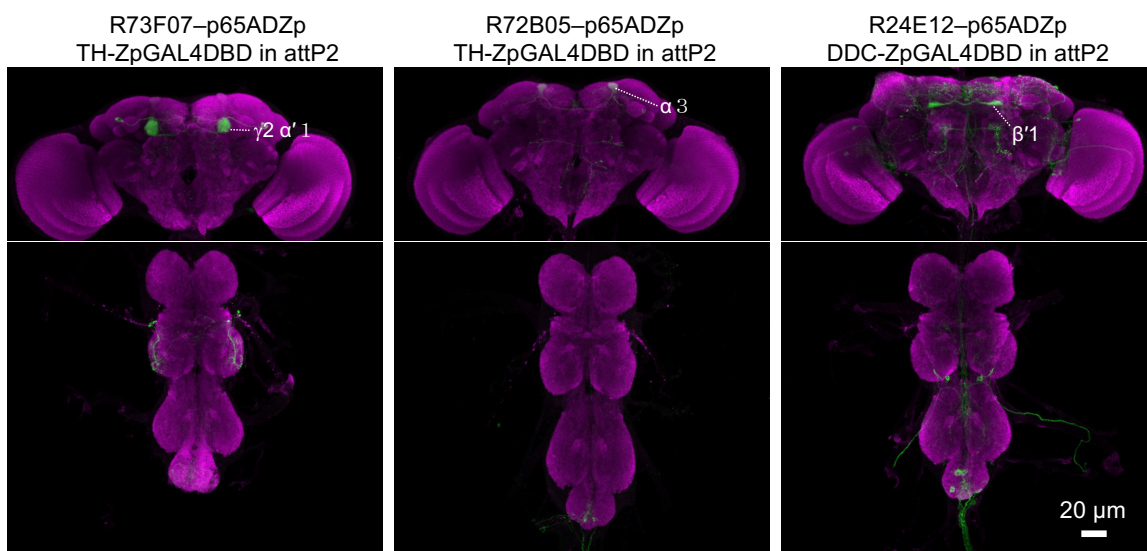

**Figure2 - figure supplement 1**

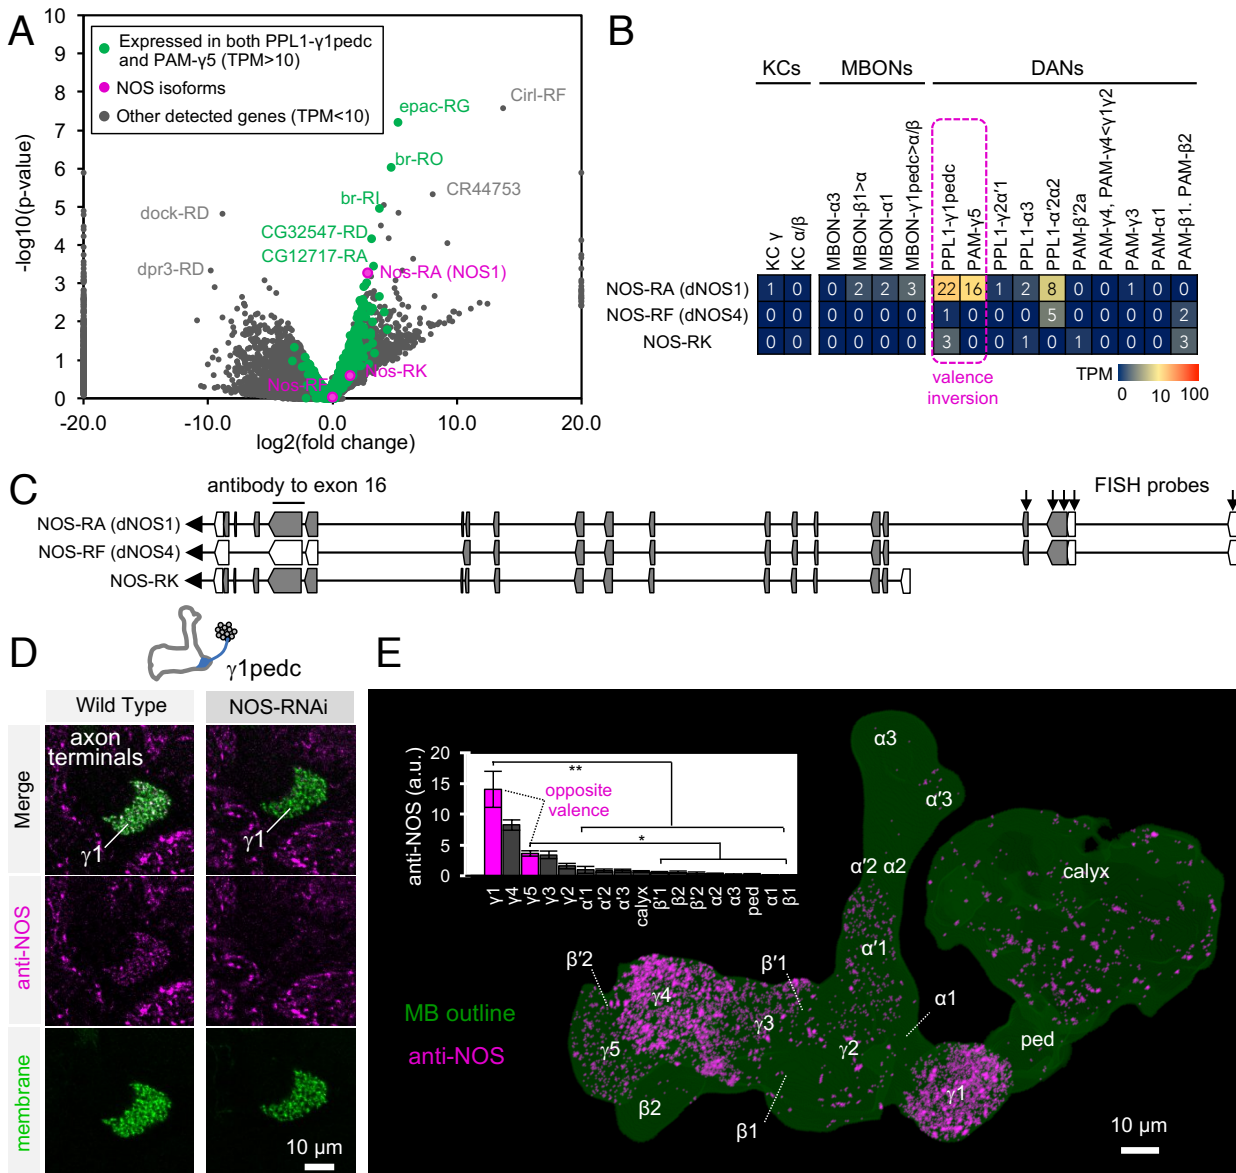

**Figure 3**

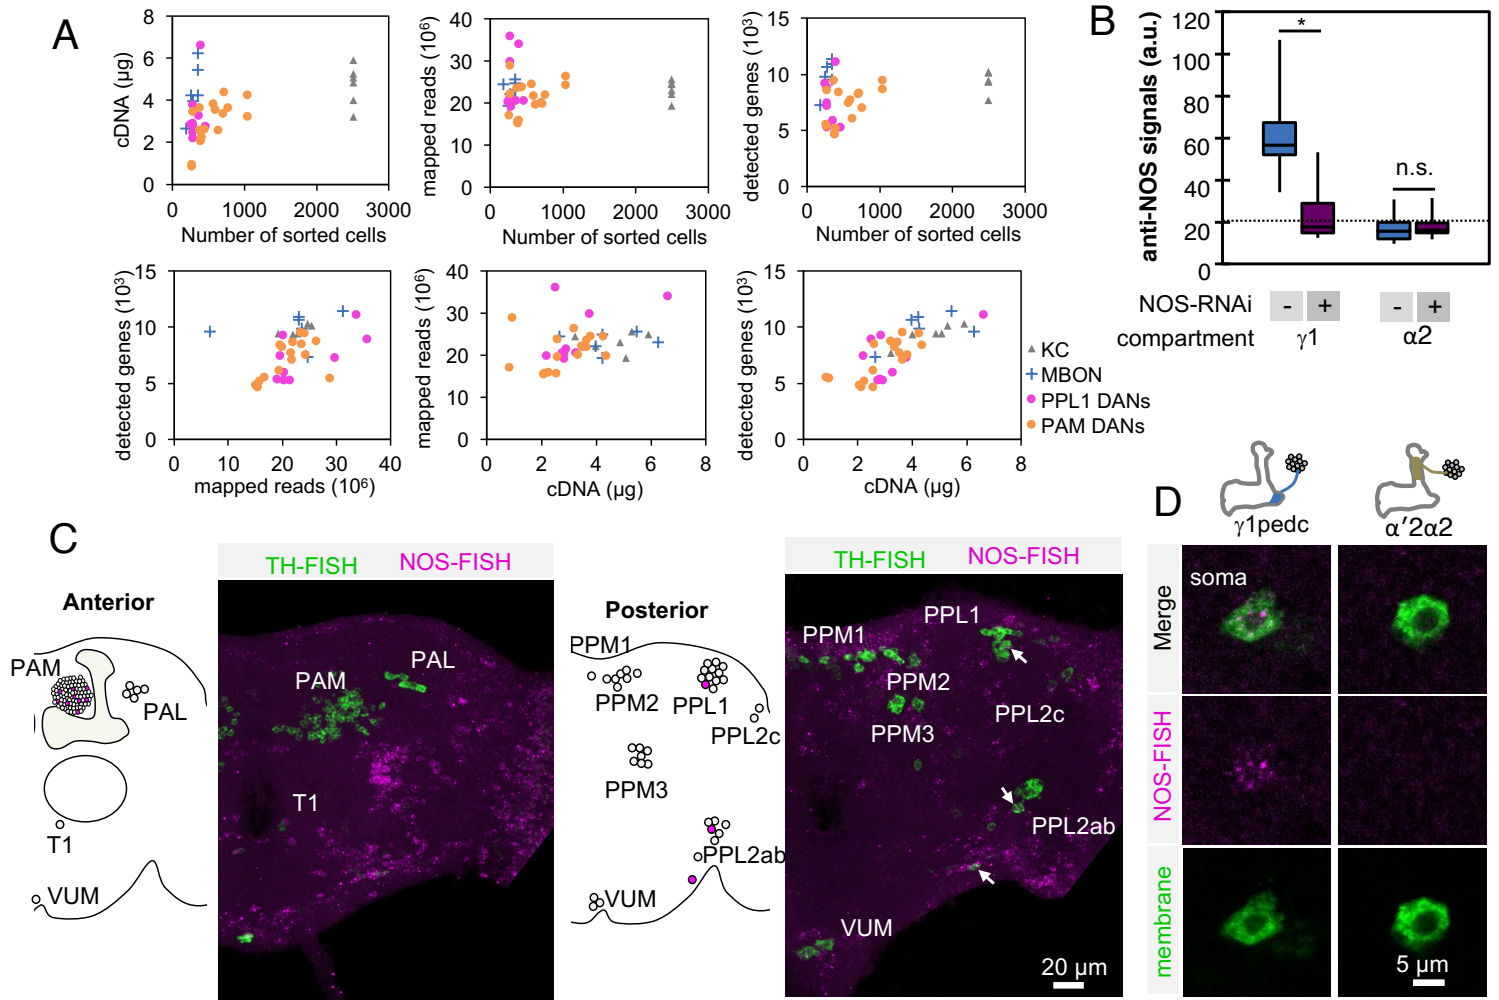

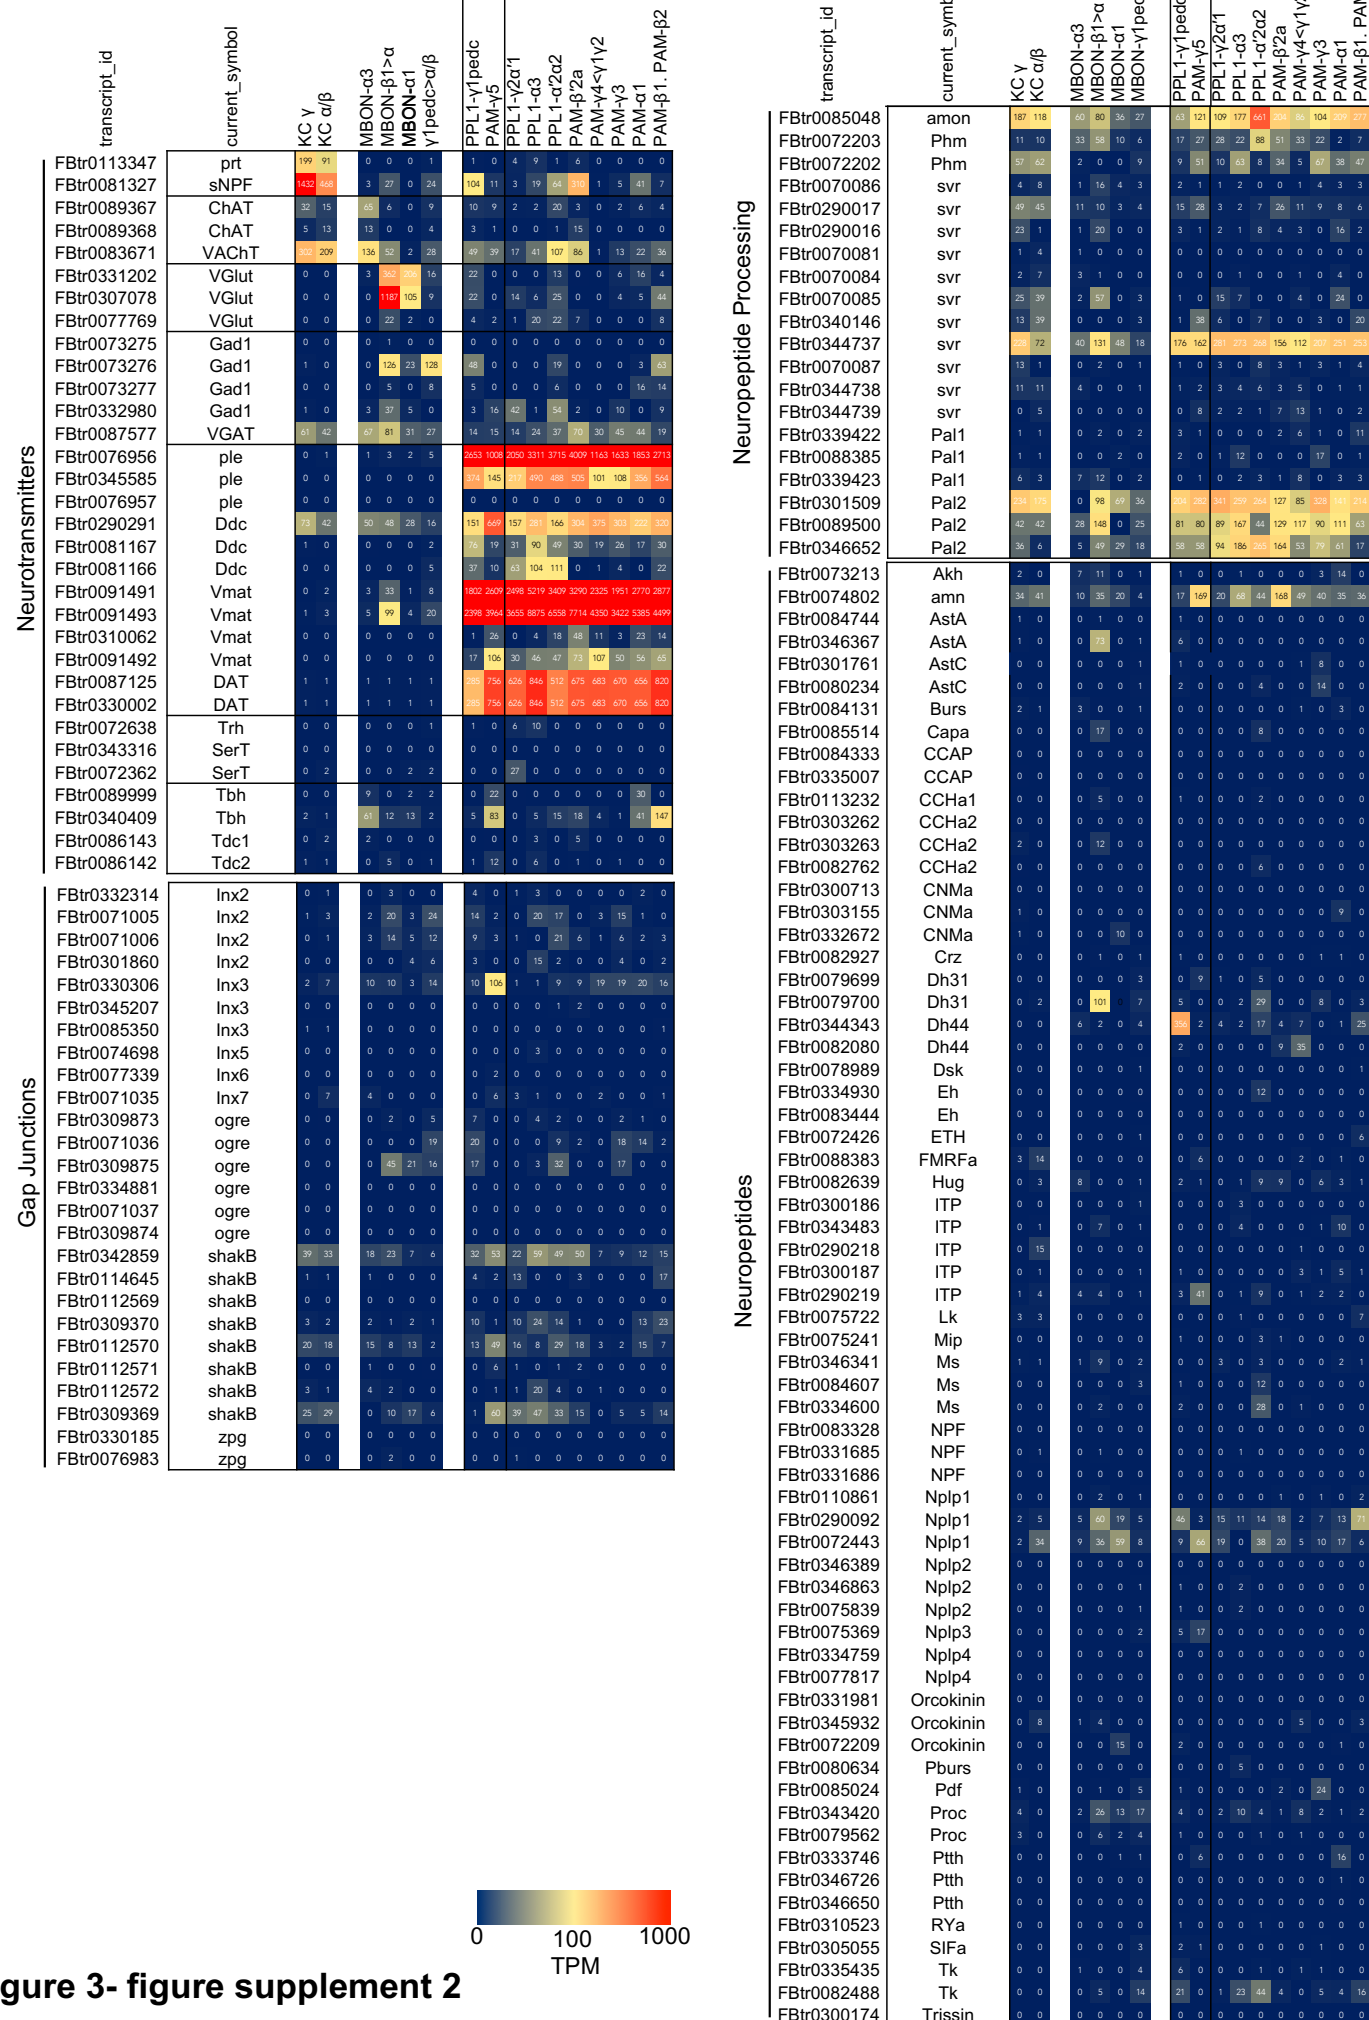

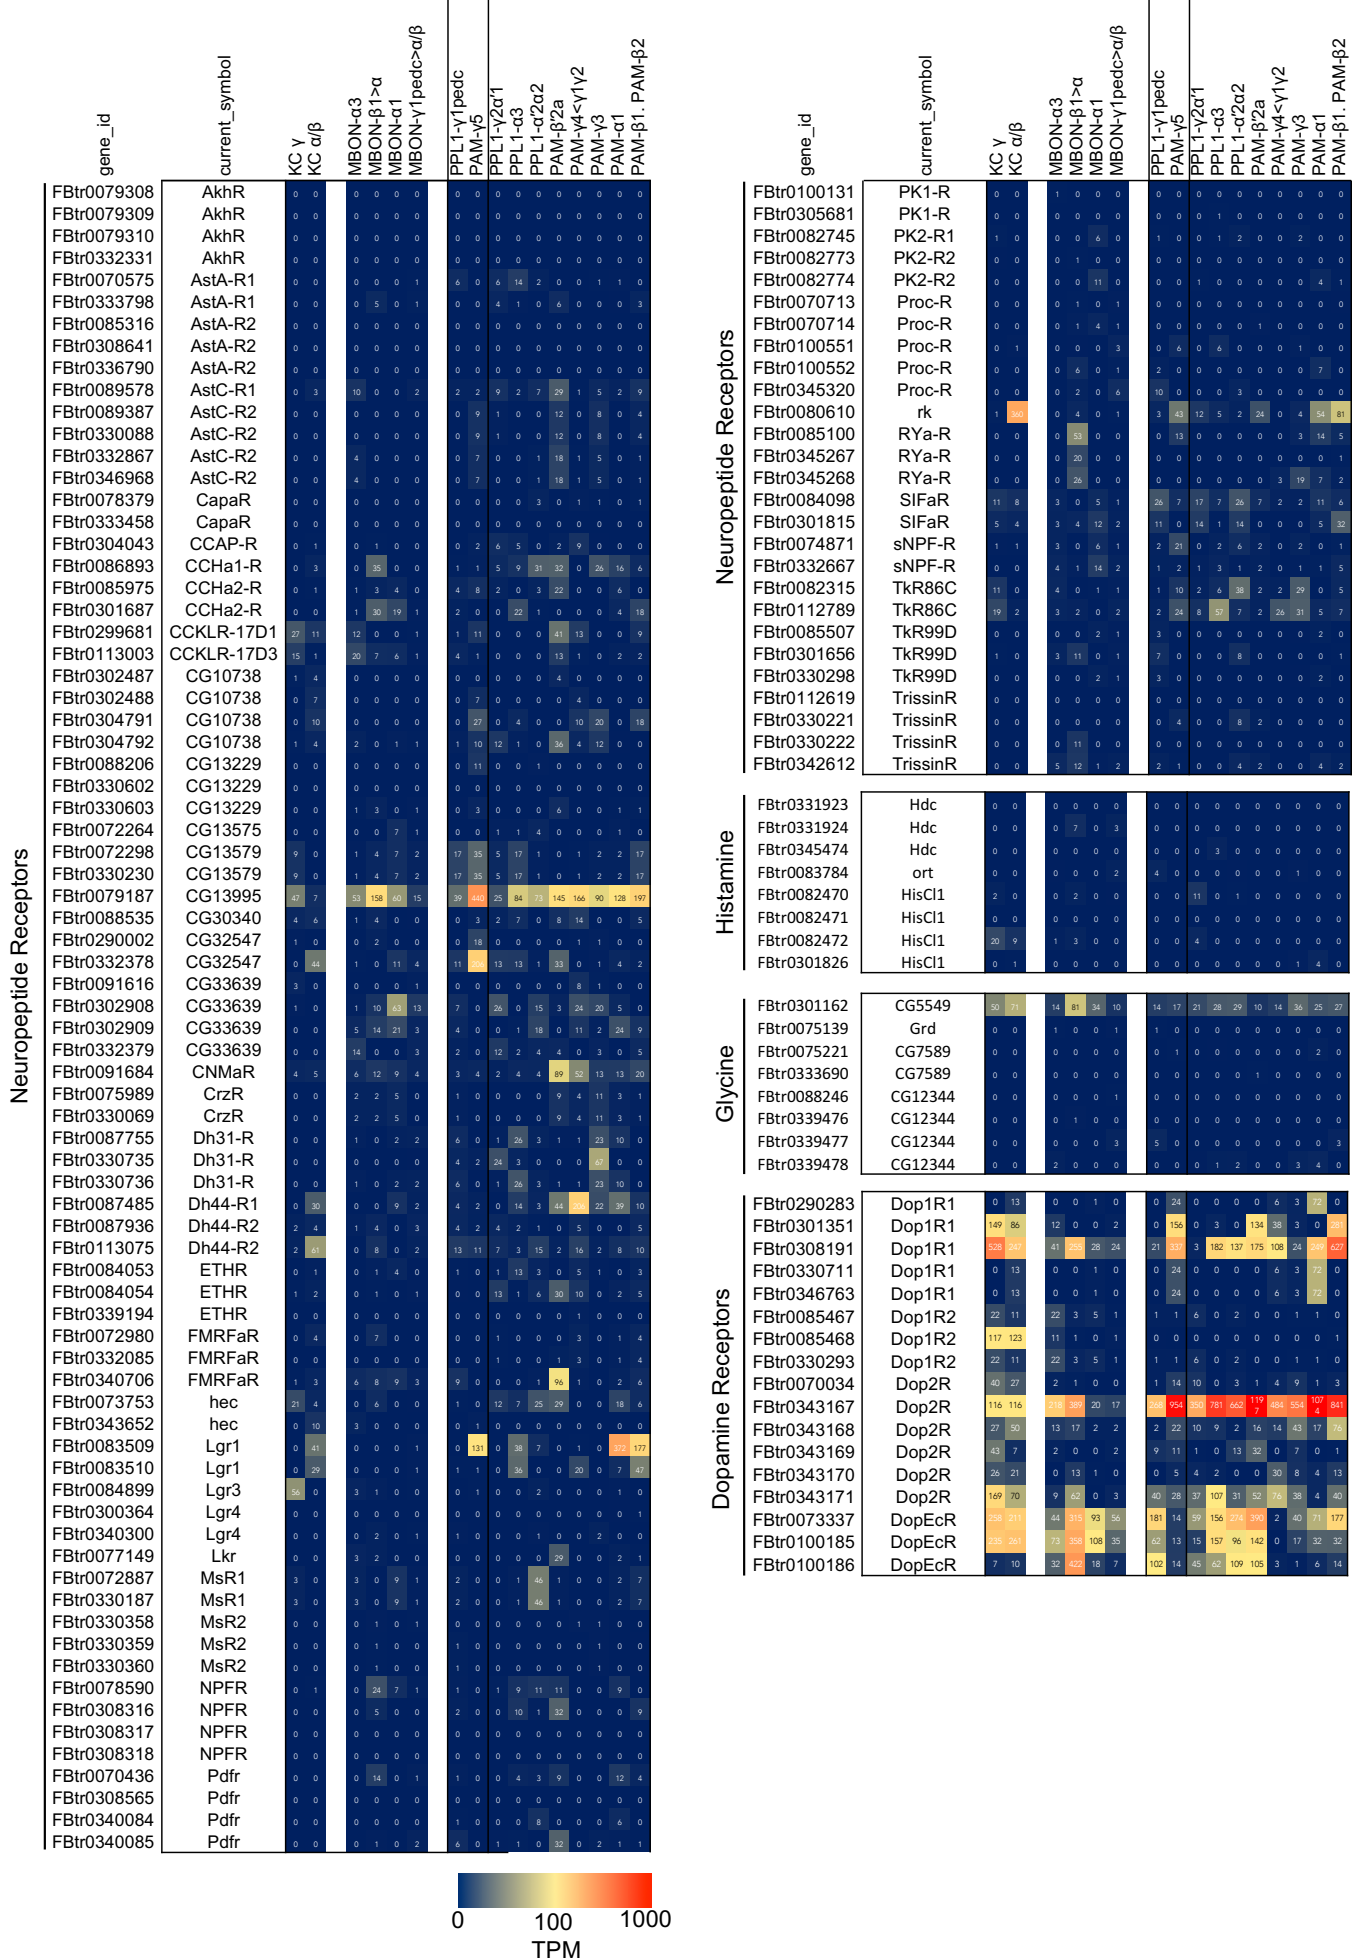

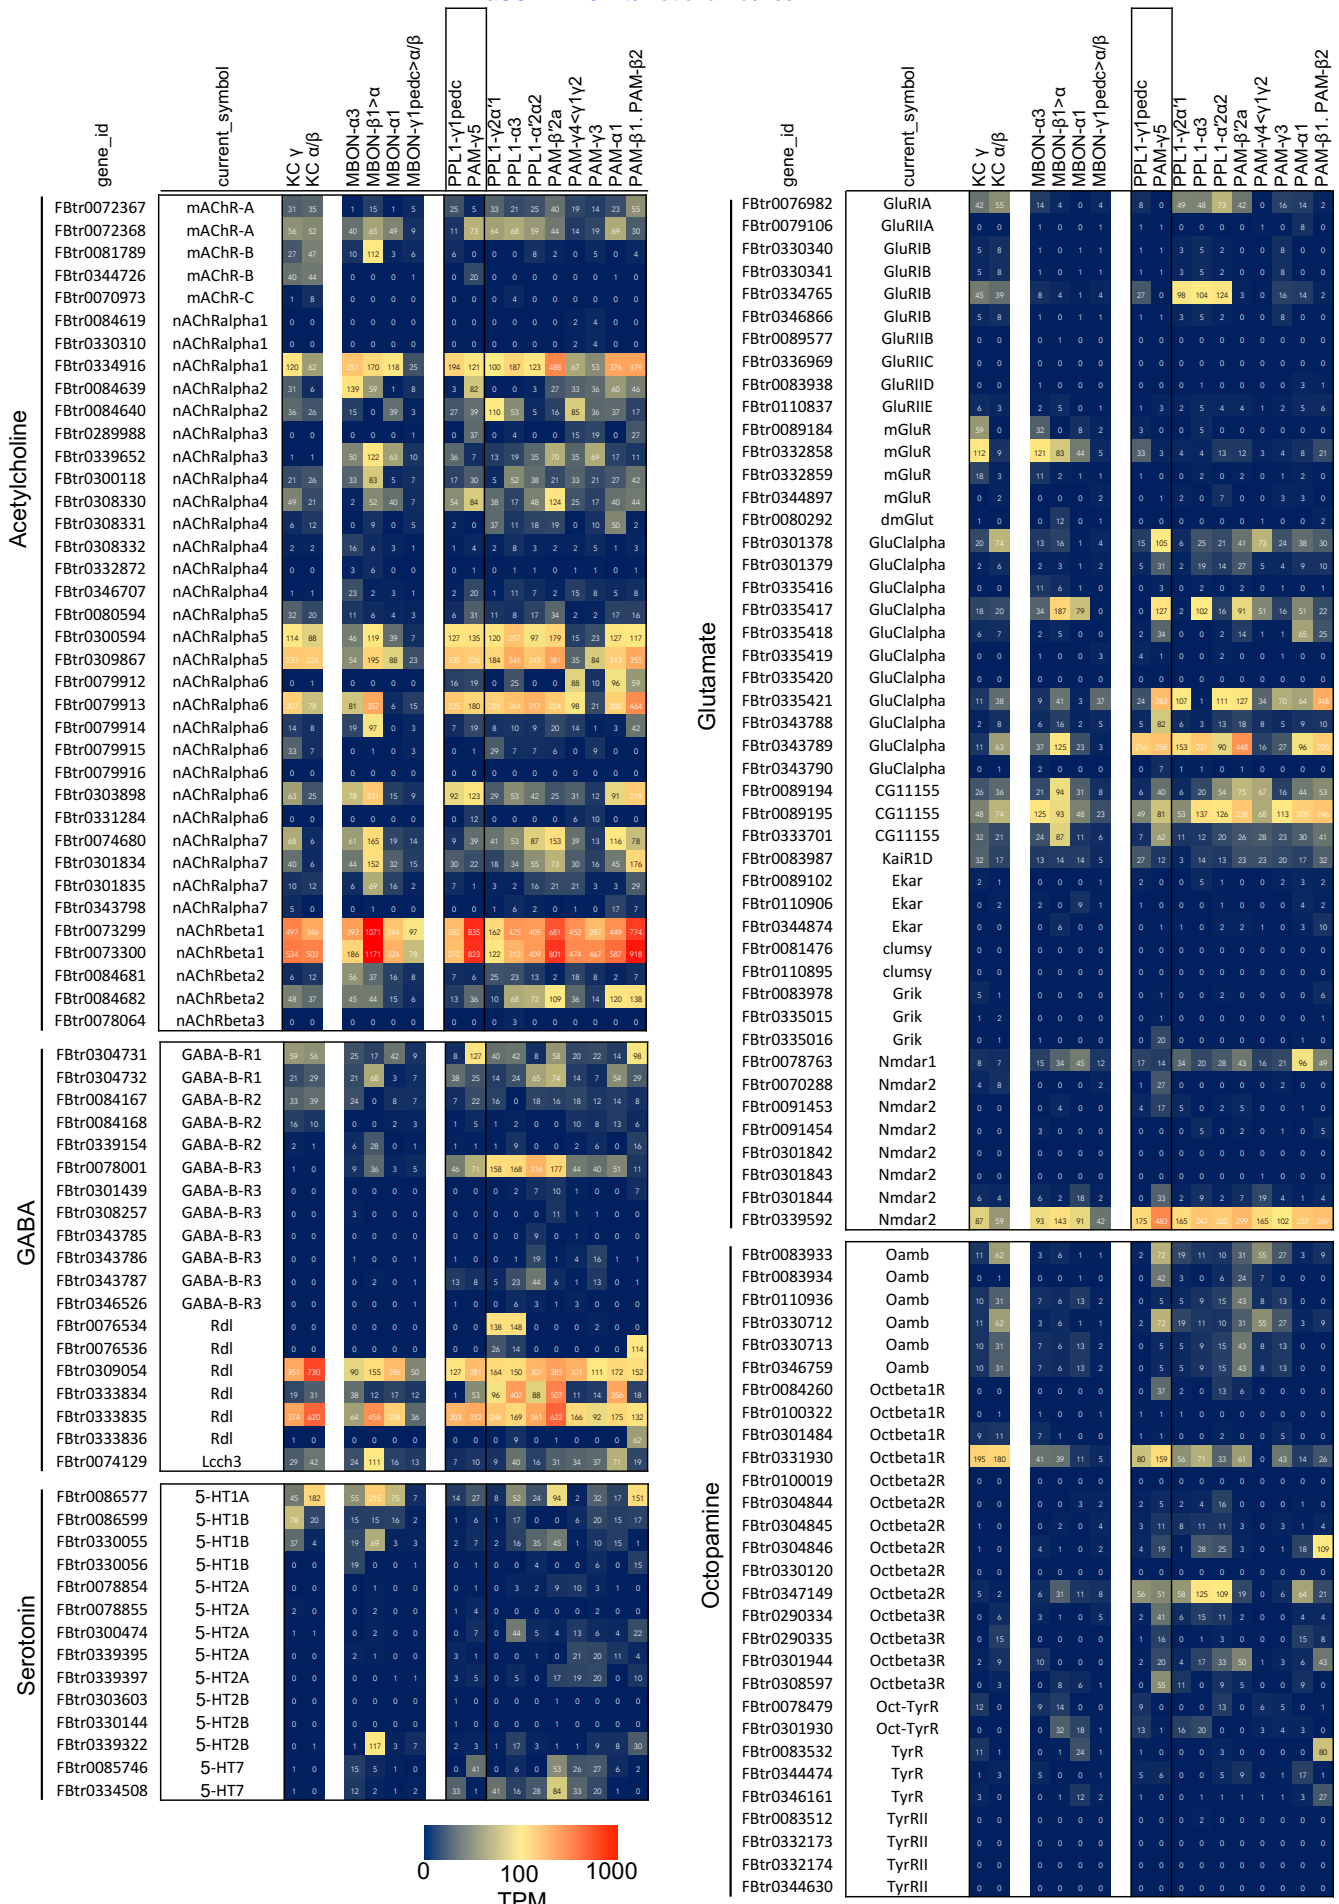

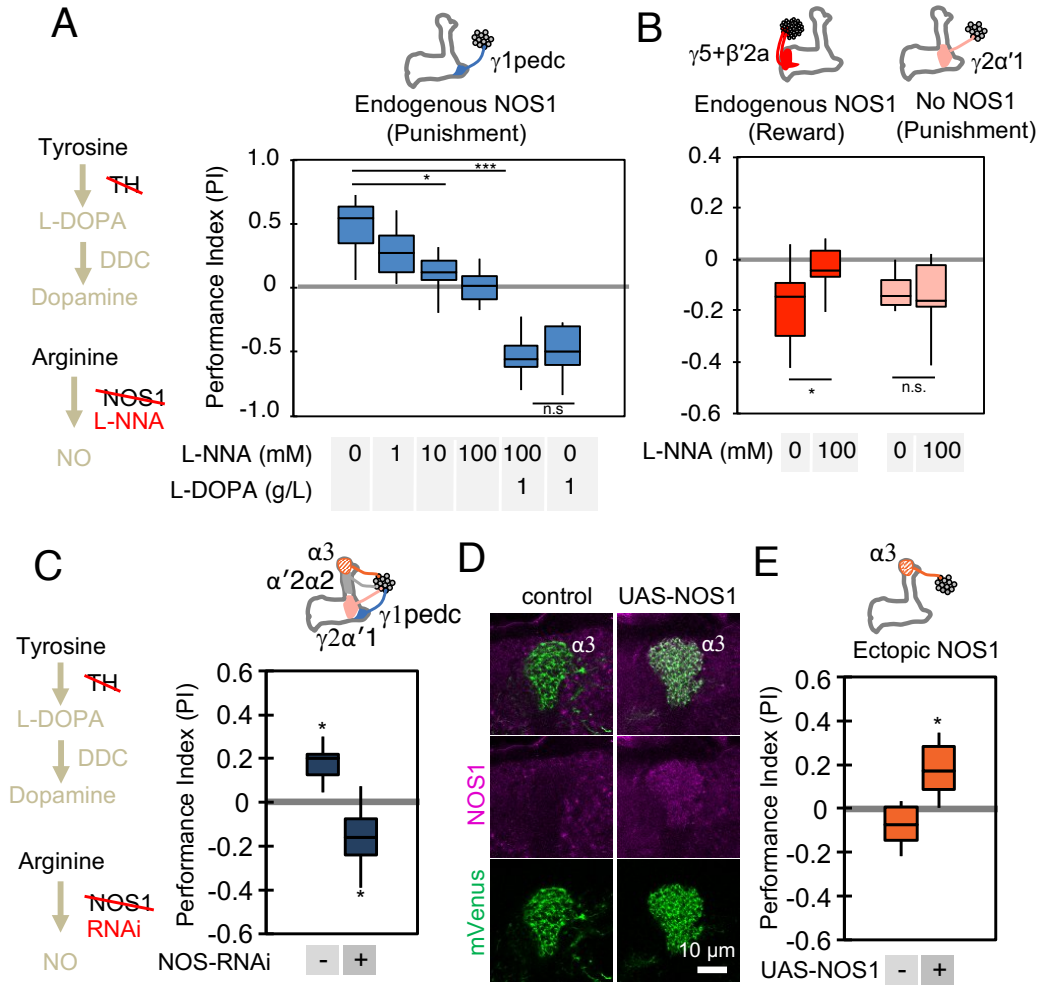

**Figure 4**

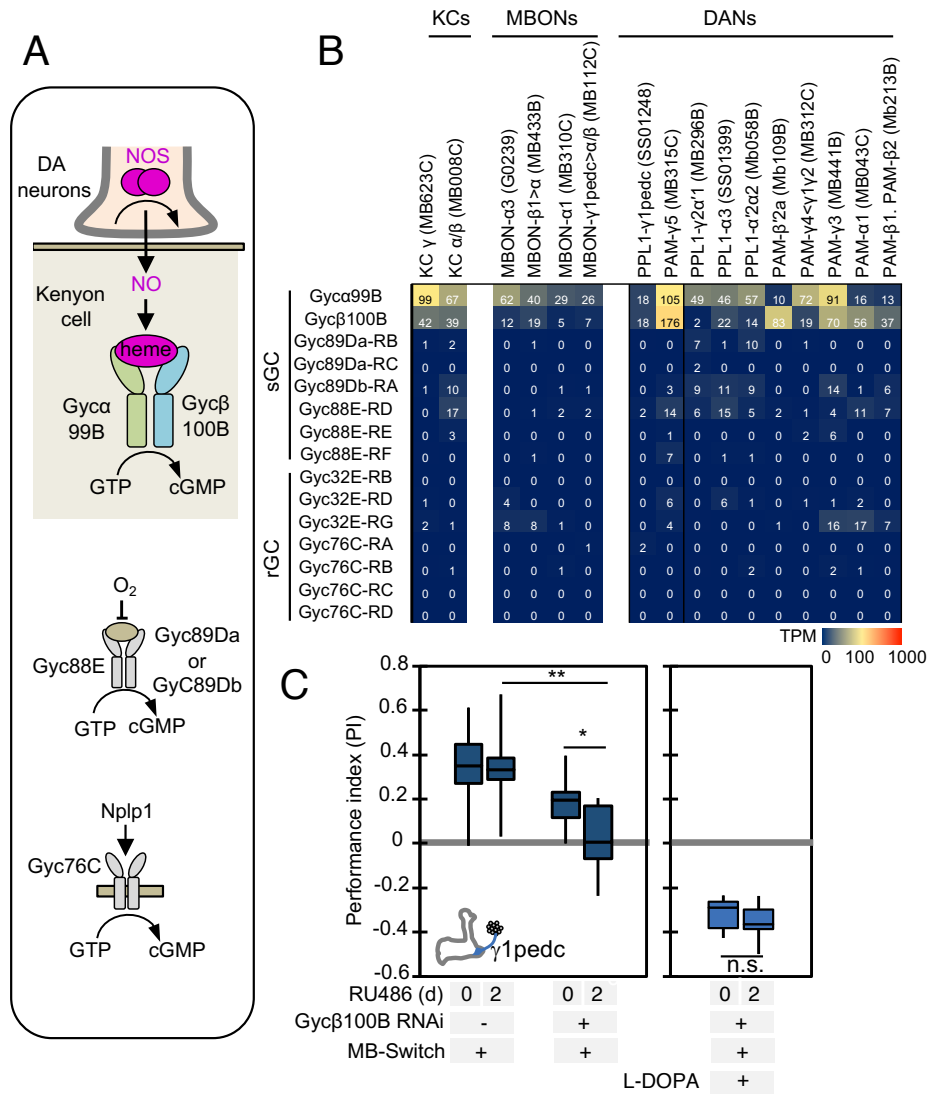

**Figure 5**



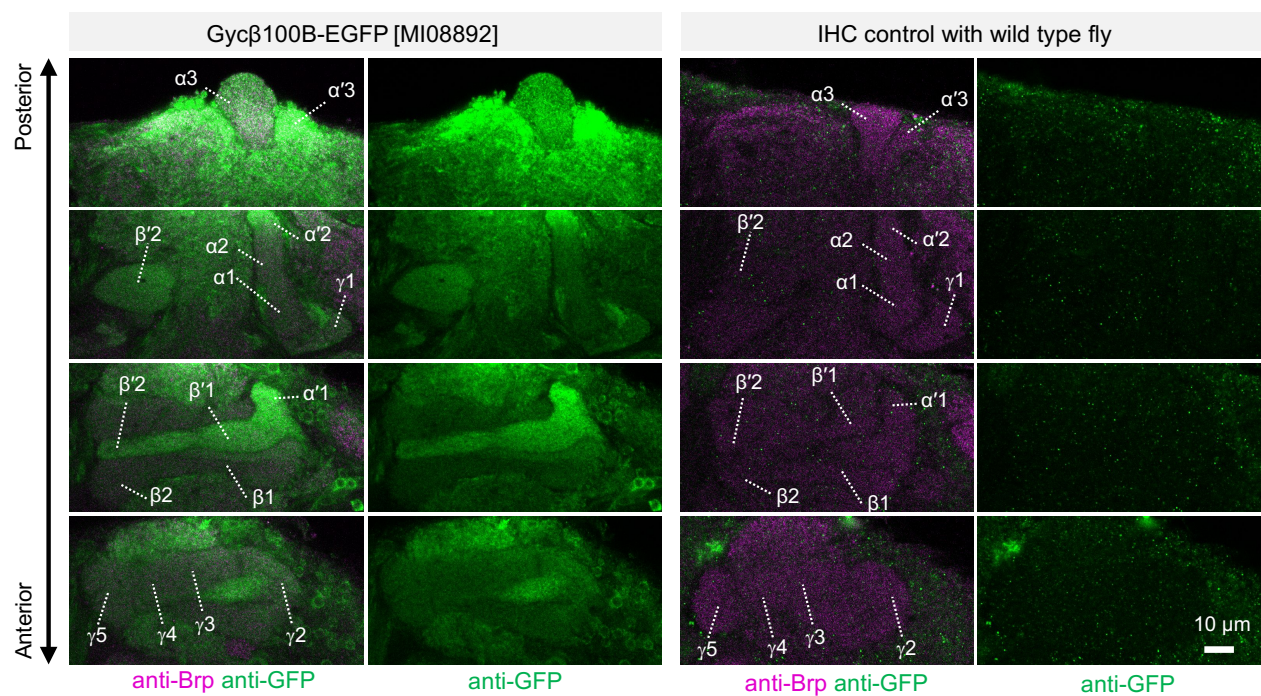

Figure 5- figure supplement 1

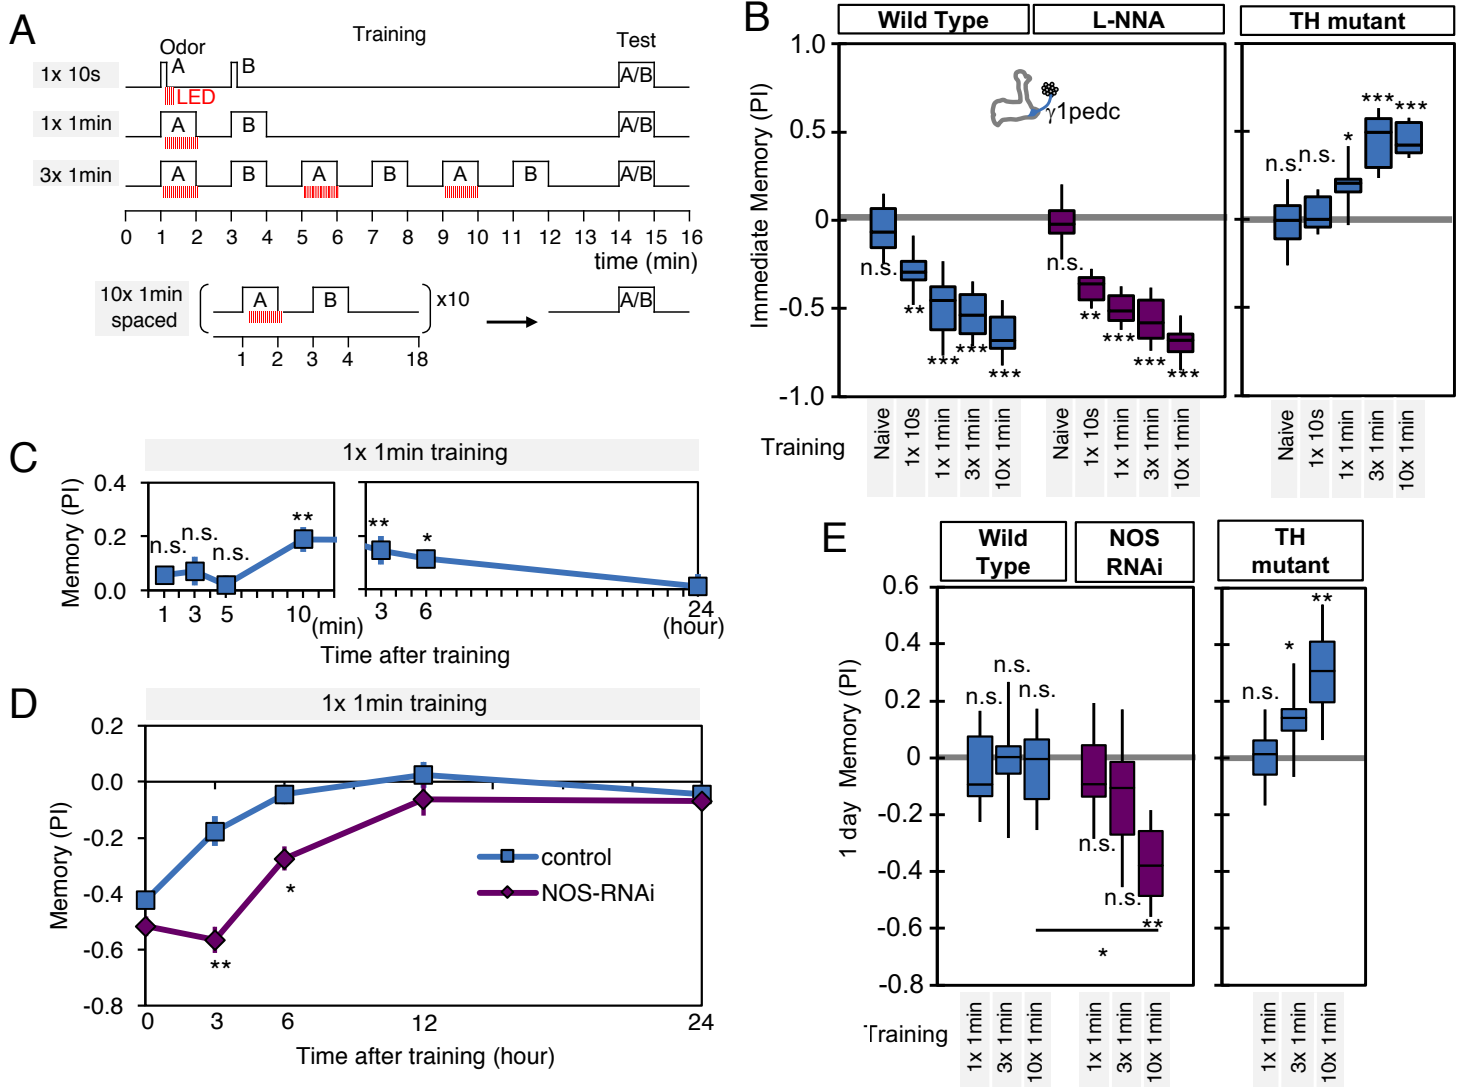

**Figure 6**

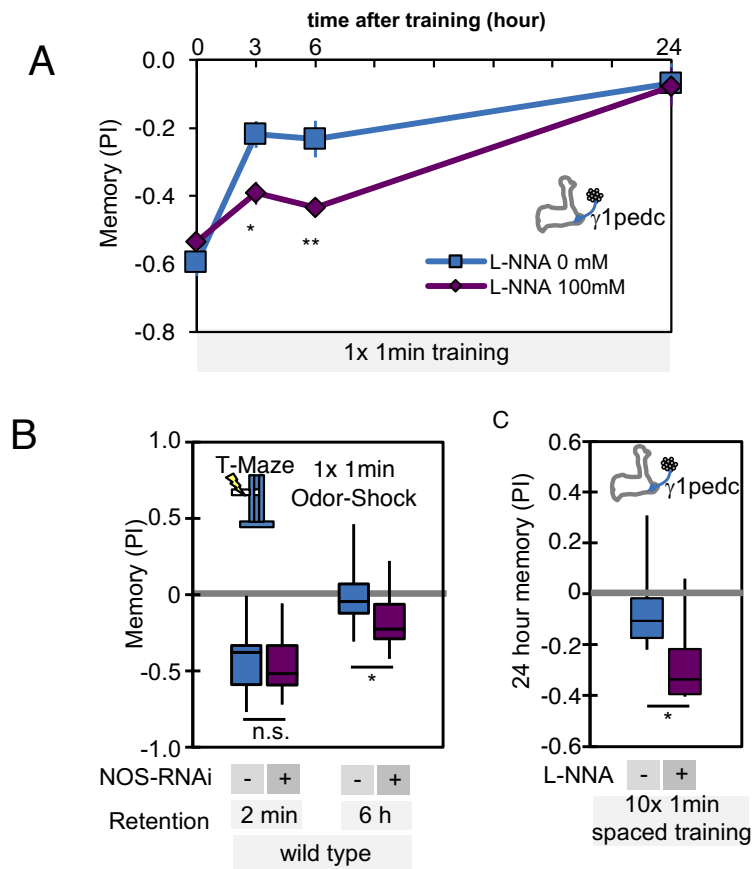

**Figure 6- figure supplement 1**

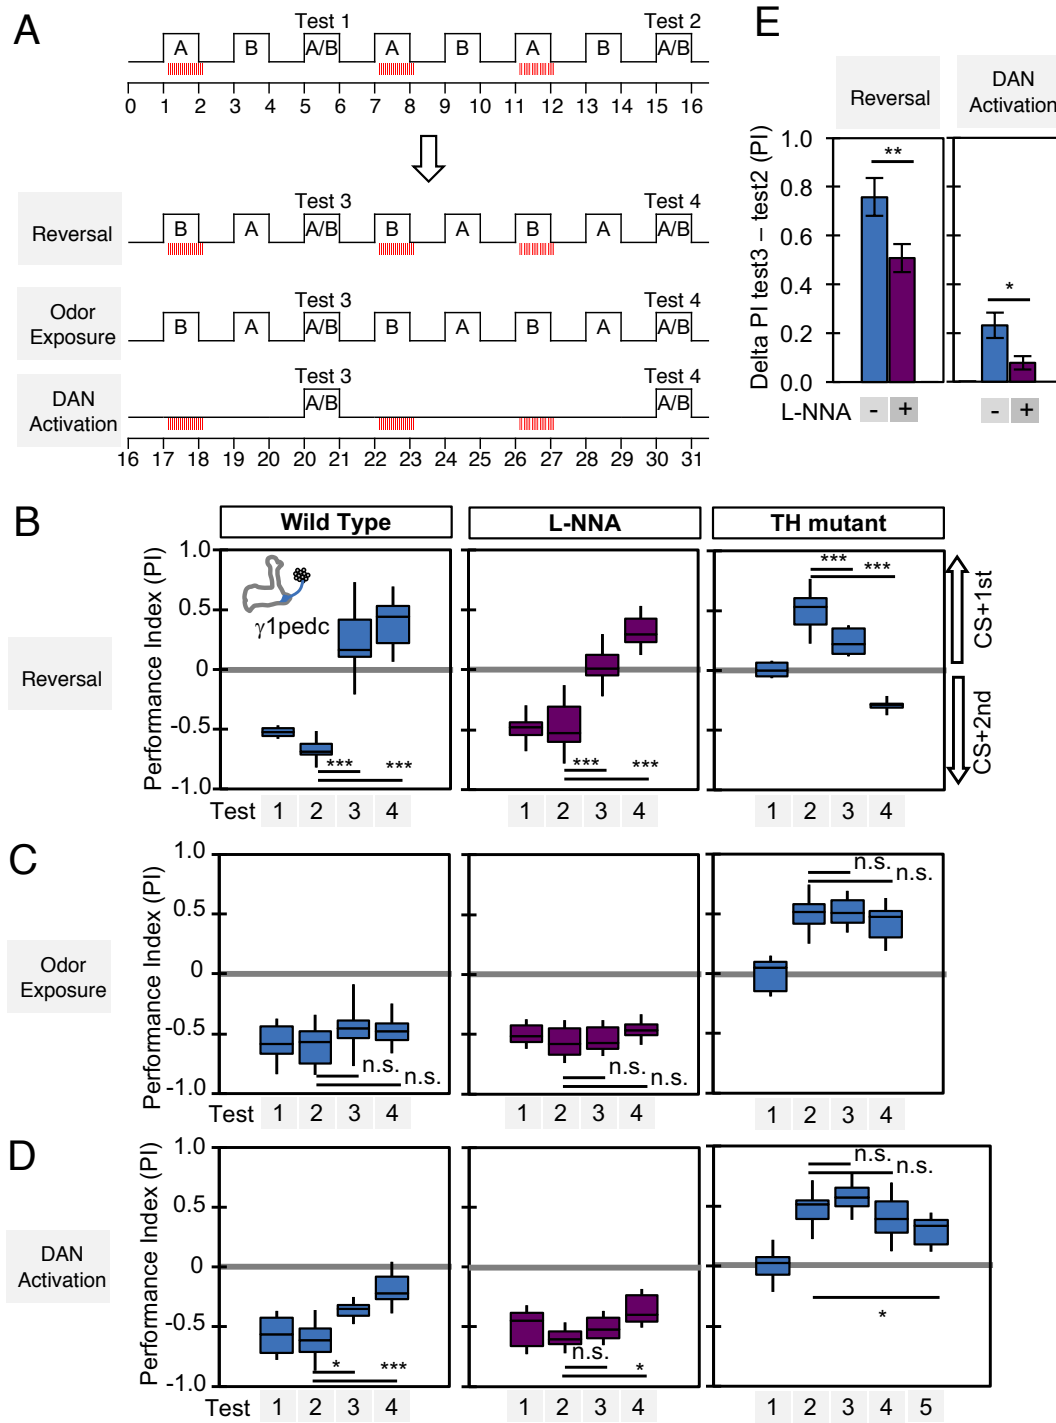

**Figure 7**

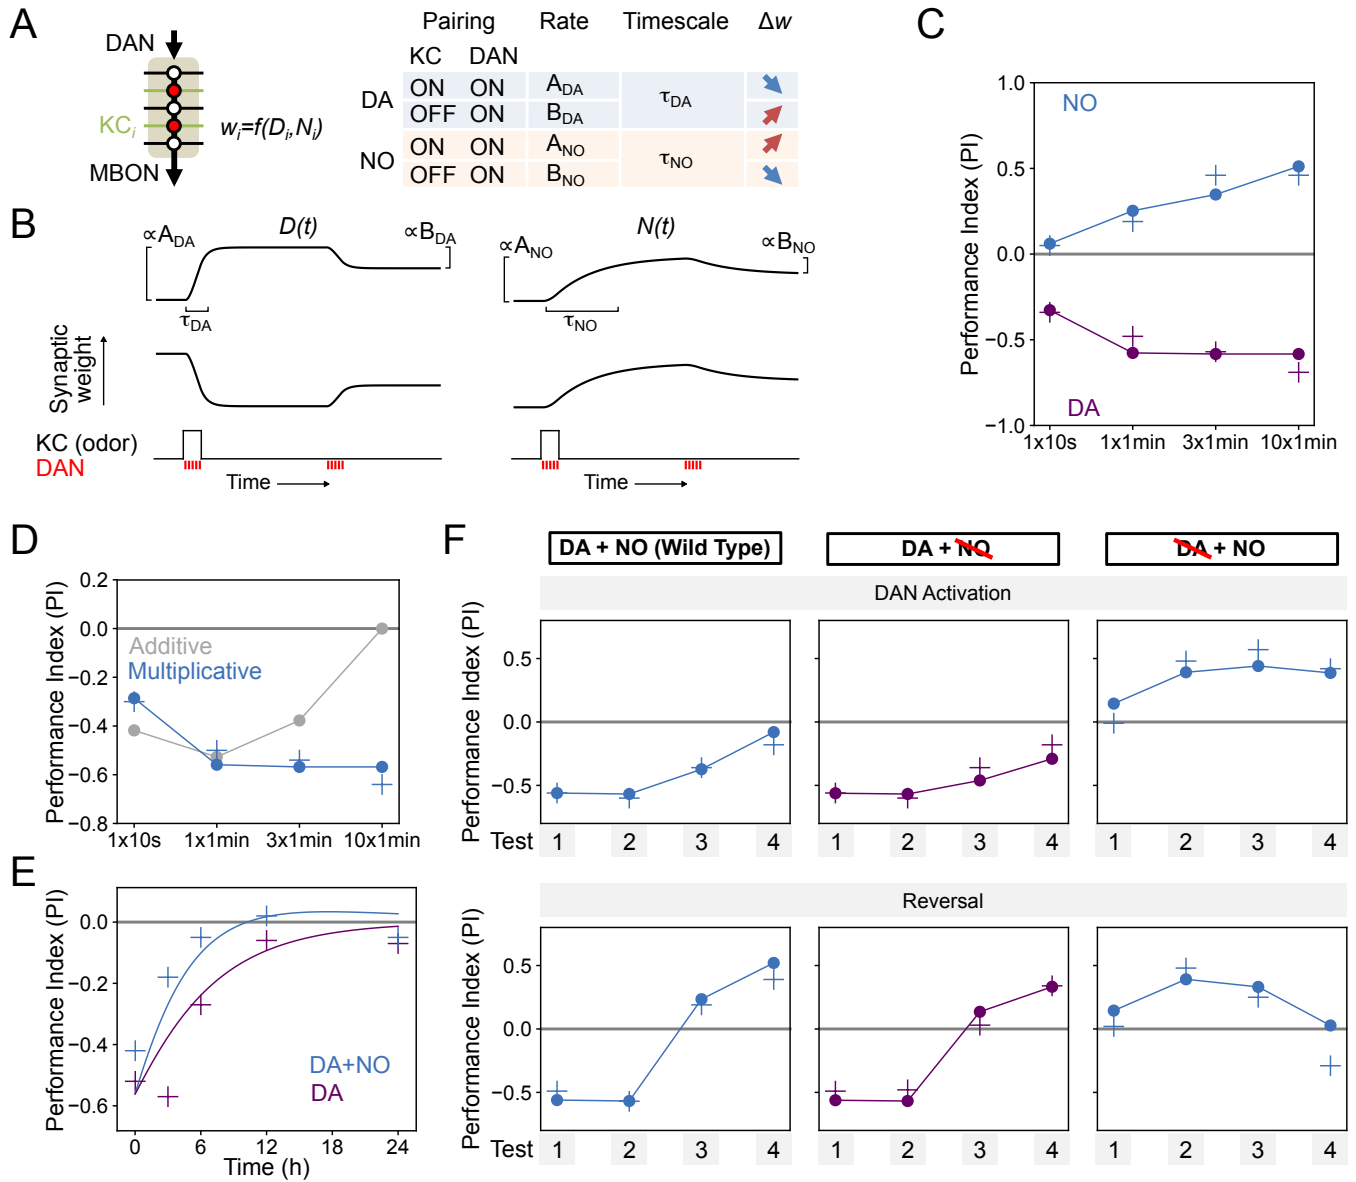

Source: https://www.biorxiv.org/content/10.1101/682815v1.full.pdf
